# Supplementary material for: Excess burden of non-communicable disease years of life lost from heat in rural Burkina Faso: a time series analysis of the years 2000–2010
Source: PubMed Central journal article supplement — BMJ Open. 2017 Nov 4;7(11):e018068. doi: 10.1136/bmjopen-2017-018068 (PMC5695355; doi:10.1136/bmjopen-2017-018068), 2017-11-04
Supplement: bmjopen-2017-018068.draft_revisions.pdf [file bmjopen-2017-018068.draft_revisions.pdf]

# BMJ Open

BMJ Open is committed to open peer review. As part of this commitment we make the peer review history of every article we publish publicly available.

When an article is published we post the peer reviewers' comments and the authors' responses online. We also post the versions of the paper that were used during peer review. These are the versions that the peer review comments apply to.

The versions of the paper that follow are the versions that were submitted during the peer review process. They are not the versions of record or the final published versions. They should not be cited or distributed as the published version of this manuscript.

BMJ Open is an open access journal and the full, final, typeset and author-corrected version of record of the manuscript is available on our site with no access controls, subscription charges or pay-per-view fees (<http://bmjopen.bmj.com>).

If you have any questions on BMJ Open's open peer review process please email [editorial.bmjopen@bmj.com](mailto:editorial.bmjopen@bmj.com)

# BMJ Open

## Excess burden of non-communicable disease years of life lost from heat in rural Burkina Faso: a time-series analysis of the years 2000-2010

|                                 |                                                                                                                                                                                                                                                                                                                           |
|---------------------------------|---------------------------------------------------------------------------------------------------------------------------------------------------------------------------------------------------------------------------------------------------------------------------------------------------------------------------|
| Journal:                        | <i>BMJ Open</i>                                                                                                                                                                                                                                                                                                           |
| Manuscript ID                   | bmjopen-2017-018068                                                                                                                                                                                                                                                                                                       |
| Article Type:                   | Research                                                                                                                                                                                                                                                                                                                  |
| Date Submitted by the Author:   | 05-Jun-2017                                                                                                                                                                                                                                                                                                               |
| Complete List of Authors:       | Bunker, A.; Heidelberg University, Network Aging Research<br>Sewe, Maquins ; Umeå University<br>Sie, Ali; Centre de Recherche en Sante de Nouna<br>Rocklov, Joachim; Umea Universitet Nationalekonomi,<br>Sauerborn, Rainer; Institute of Public Health, University of Heidelberg,<br>Tropical Medecine and Public Health |
| <b>Primary Subject Heading</b>: | Epidemiology                                                                                                                                                                                                                                                                                                              |
| Secondary Subject Heading:      | Global health, Public health                                                                                                                                                                                                                                                                                              |
| Keywords:                       | Heat, Year of life lost, Non-communicable disease, Sub-Saharan Africa, Time-series                                                                                                                                                                                                                                        |
|                                 |                                                                                                                                                                                                                                                                                                                           |

SCHOLARONE™  
Manuscripts

1  
2  
3 **Excess burden of non-communicable disease years of life lost from heat in rural**  
4 **Burkina Faso: a time-series analysis of the years 2000-2010**  
5  
6

7  
8 Aditi Bunker<sup>1,2</sup>, Maquins Odhiambo Sewe<sup>3</sup>, Ali Sie<sup>4</sup>, Joacim Rocklöv<sup>3</sup>, Rainer  
9 Sauerborn<sup>2</sup>  
10

11  
12 <sup>1</sup>*Network Aging Research, University of Heidelberg, Bergheimer Strasse 20, D-69115*  
13 *Heidelberg, Germany*  
14

15  
16 <sup>2</sup>*Institute of Public Health, University of Heidelberg, Im Neuenheimer Feld 324,*  
17 *69120 Heidelberg, Germany*  
18

19  
20 <sup>3</sup>*Department of Public Health and Clinical Medicine, Epidemiology and Global*  
21 *Health, Umeå University, 901 87, Umeå, Sweden*  
22

23  
24 <sup>4</sup>*Centre de Recherche en Santé de Nouna, Burkina Faso, PO BOX 02 Nouna, Burkina*  
25 *Faso*  
26  
27  
28  
29  
30  
31

32 **Corresponding author**

33 Aditi Bunker  
34 Network Aging Research  
35 University of Heidelberg  
36 Bergheimer Strasse 20  
37 D-69115 Heidelberg  
38 Germany  
39 E-mail: bunker@nar.uni-heidelberg.de  
40 Phone: +41-762800186  
41  
42  
43  
44  
45  
46  
47  
48  
49  
50  
51  
52  
53  
54  
55  
56  
57  
58  
59  
60

## Abstract

### Objectives

Investigate the association of heat exposure on years of life lost (YLL) from non-communicable diseases (NCD) in Nouna, Burkina Faso between 2000-2010.

### Design

Daily time-series regression analysis using distributed lag non-linear models, assuming a quasi-Poisson distribution of YLL.

### Setting

Nouna Health and Demographic Surveillance System, Kossi Province, Rural Burkina Faso.

### Participants

18,367 NCD-YLL corresponding to 790 NCD deaths recorded in the Nouna HDSS register over 11 years.

### Main outcome measure

Excess mean daily NCD-YLL were generated from the relative risk of maximum daily temperature on NCD-YLL, including effects delayed up to 14 days.

### Results

Daily average NCD-YLL were 4.6, 2.4 and 2.1 person-years for all-ages, males and females, respectively. Moderate 4-day cumulative rise in maximum temperature from 36.4°C (50<sup>th</sup> percentile) to 41.4°C (90<sup>th</sup> percentile) resulted in 4.44 (95% CI 0.24 to 12.28) excess daily NCD-YLL for all-ages, rising to 7.39 (0.32 to 24.62) at extreme temperature (42.8°C; 99<sup>th</sup> percentile). The strongest health effects manifested on the day of heat exposure (lag 0), where 0.81 (0.13 to 1.59) excess mean NCD-YLL occurred daily at 41.7°C compared to 36.4°C, diminishing in statistical significance after 4 days. At lag 0, daily excess mean NCD-YLL were higher for males 0.58 (0.11 to 1.15) compared to females 0.15 (-0.25 to 0.63) at 41.7°C versus 36.4°C.

### Conclusion

Premature death from NCD was elevated significantly with moderate and extreme heat exposure. These findings have important implications for developing adaptation and mitigation strategies to reduce ambient heat exposure and preventive measures for limiting NCD in Africa.

**Key words:** temperature, heat, years of life lost, non-communicable disease, Africa, time-series.

### Strengths and limitations of this study

- This study investigated the relationship between two defining public health issues affecting Sub-Saharan Africa; increasing ambient heat from climate change and the rising prevalence of non-communicable disease
- Eleven years of high-quality health and demographic data from rural Africa was exploited for analysis
- Only premature death was quantified as the outcome because long-term morbidity data were unavailable
- Temperature data from a weather station located 53 km from the study location was used as a proxy for individual level temperature exposure.

## Introduction

As the global average temperature rises, epidemiological evidence on the temperature-health association in neglected African populations is needed to develop appropriate interventions. Surface temperature over West Africa and the Sahel increased by 0.5-0.8°C between 1970 and 2010, and at a faster pace in the most recent 20 years [1]. Analysis of longitudinal data from 12 Health and Demographic Surveillance Sites (HDSS), which includes the Nouna HDSS in Burkina Faso, forecasts that the mean temperature in Africa will exceed the 1900-2000 decadal average by 2100 under all climate change scenarios [2]. In a study applying six climate model-future scenarios across six HDSS sites, the most conservative combination, rapid economic growth and balanced energy sources resulted in a 0.5-1°C temperature increase by 2100, whereas most combinations projected a 2-3°C temperature rise in the same period [2]. Prolonged exposure to high ambient temperature in the subsistence farming community of Nouna, and low adaptive capacity makes this community particularly vulnerable to the effects of temperature increase.

Non-communicable disease (NCD) cause substantial economic drain to society by adversely affecting four pillars of economic growth; labour supply, productivity, investments and education. Projections from 2006 indicated that if no action was taken to reduce the risk of NCD in 23 low-and-middle income countries, US\$83 billion would be lost over the subsequent decade to the impact of heart disease, stroke and diabetes [3]. As life expectancy increases in Burkina Faso, people will have more time to develop chronic and degenerative disorders; NCD will therefore contribute increasingly to population mortality. In 2014, NCD accounted for 32% of all deaths in Burkina Faso. The main contributors were cardiovascular disease, cancer, chronic respiratory disease and diabetes [4]. In 2011, Friel *et al.* presented a review exposing the link between climate change and a wide range of NCD, and argued that more frequent and intense heat extremes could exacerbate cardiovascular and respiratory health outcomes [5].

Previous studies have explored the impact of extreme events such as heatwaves or cold waves [6,7] on health, which are anticipated to increase in frequency and magnitude with climate change [8]. A recent multicity study, however, found that

1  
2  
3 milder non-optimal temperature rather than extreme temperature was responsible for  
4 most of the temperature-related mortality burden (defined as below the 2.5<sup>th</sup> and  
5 above the 97.5<sup>th</sup> percentile) [9]. Unfortunately, no African studies were included by  
6 Gasparrini et al. [9]. Heat (and cold) waves are defined by magnitude and duration;  
7 for example, two or more consecutive days exceeding the 98-99<sup>th</sup> (or 1-2<sup>nd</sup>) percentile  
8 of the temperature range. Excess risks are a comparison of heatwave periods with  
9 non-heatwaves periods in previous years. Our study investigates the health risks of  
10 moderate to extreme heat, where extreme temperature is defined as below the 5<sup>th</sup> and  
11 above the 95<sup>th</sup> percentiles of maximum temperature.  
12  
13  
14  
15  
16  
17  
18  
19

20 Epidemiological studies on the temperature-health association in African populations  
21 have primarily measured daily deaths as the outcome [10,11]. Rather than the number  
22 of deaths, we used years of life lost (YLL), a global burden of disease (GBD)  
23 outcome metric for ascertaining premature death. YLL is an aggregate of life  
24 expectancy and death counts that gives the absolute value of years of life lost from a  
25 certain exposure, rather than a relative risk. In the only previous study set in Africa  
26 investigating the temperature-YLL association, Egondi et al. found no heat effects on  
27 *all-cause* YLL in the East African highlands of Nairobi, Kenya. A reduction in  
28 temperature (21°C compared with 26°C), however, resulted in 27.4 excess all-cause  
29 YLL per day (95% CI 2.7 to 52.0) [12]. Africa faces the dual challenge of coping with  
30 rising temperatures from climate change and increasing prevalence of NCD. The  
31 paucity of population-based studies set in African focused on the impact of  
32 temperature on NCD health outcomes suggests further studies are required. Our study  
33 addresses this research gap by investigating the impact of 11 years of heat exposure  
34 on YLL from NCD in the Nouna HDSS.  
35  
36  
37  
38  
39  
40  
41  
42  
43  
44  
45

## 46 **Methods**

### 47 ***Data collection***

48 Health outcome data were obtained from the HDSS, Centre de Recherche en Santé de  
49 Nouna, Burkina Faso [13]. All registered deaths between 1 January 2000 to 31  
50 December 2010 were included. Vital statistics for each resident included a unique  
51 identifying number (ID), date of birth, date of immigration into the HDSS, date of  
52 death, date of emigration from the HDSS and gender. Raw mortality data comprised a  
53 unique ID number for each death event, date of birth, date of death, sex, cause of  
54  
55  
56  
57  
58  
59  
60

1  
2  
3 death coded as an International Classification of Disease (ICD10) code, and an  
4 accompanying cause of death in French. Cause of death was established by verbal  
5 autopsy [14]. Age of death was calculated as the difference between the date of death  
6 and birth. We applied the GBD cause-specific categories and ICD10 codes to define  
7  
8 NCD as an aggregate of: malignant neoplasms (C00-C97), other neoplasms (D00-  
9 D48), □diabetes mellitus (E10-E14), endocrine disorders (D55-D64; minus-D64.9,  
10 D65-D89, E03-E07, E15-16, E20-E34, E65-E88), neuropsychiatric conditions (F01-  
11 F99, G06-G98), sense organ diseases (H00-H61, H68-H93), cardiovascular diseases  
12 (I00-I99), respiratory diseases (J30-J98), digestive diseases (K00-K92), genitourinary  
13 diseases (N00-N64, N75-N98), skin diseases (L00-L98), musculoskeletal diseases  
14 (M00-M99) and congenital anomalies (Q00-Q99) [15].  
15  
16  
17  
18  
19  
20  
21  
22

### 23 *Computation of daily years of life lost*

24 Different resolutions of life tables can be used to calculate YLL i.e. global, country-  
25 level or local life expectancy depending on the purpose of the study. The GBD  
26 approach calculates YLL relative to the life expectancy of Japanese men and women,  
27 the highest for any societal group [16]. Weights for age and time preference can  
28 additionally be applied to reduce the contribution of death before adulthood [17]. This  
29 study used local rather than global life tables, as done in similar studies [18-20] to  
30 present realistic potential losses or gains in life years for the Nouna population  
31 grounded in real data (rather than modelled data), which is more meaningful for local  
32 decision makers. The cause of death and demographic data from the Nouna HDSS  
33 were used to build life tables for the Nouna population. The use of global life  
34 expectancy would likely produce very large YLL for populations with low life  
35 expectancy such as in Burkina Faso. Furthermore, global life expectancy is likely to  
36 be more useful when comparing YLL between two countries, which was not the aim  
37 of this study.  
38  
39  
40  
41  
42  
43  
44  
45  
46  
47  
48

49 We used the Nouna HDSS vital statistics from 2000-2010 to produce age-specific  
50 death rates. We generated gender-specific life tables to account for varying life  
51 expectancies between men and women (details in **Supplementary File**). Mean  
52 additional survival time, averaged between 2000-2010 was calculated for each age  
53 band to account for the changing population profile over this time. Abridged life  
54 tables were created in five-year increments, producing stable life expectancy  
55  
56  
57  
58  
59  
60



estimates for a relatively small population (approximately 90,000 inhabitants in 2012 [10]). The 0-1, and 1-5 age groups were, however, separated. Combining these ages would mask the lower remaining life expectancy for the 0-1 age relative to the 1-5 age group, a consequence of high infant mortality. For each NCD death, YLL were calculated by matching age and sex with the relevant life table. Daily YLL were an aggregate of individual YLL on the respective day calculated as:

a) individual YLL at time of death:

$$YLL_{individual (i)} = LE_{remaining} - Age_{death} \quad [1]$$

b) total daily YLL:

$$YLL_{daily} = \sum_{i=1}^n YLL_i \quad [2]$$

where:

$i$  is the  $i$ th individual

$LE_{remaining}$  is the conditional life expectancy

$Age_{death}$  is the age at death

$n$  is the number of deaths occurring on a given day.

We stratified NCD-YLL by sex to assess if gender differences existed.

### ***Temperature data***

We obtained hourly mean (t-mean), maximum (t-max) and minimum (t-min) temperature data from the National Climatic Data Centre for the Dédougou weather station (12.4° N, 3.4° W) from 1 January 2000 to 31 December 2010 (4071 days). The Dédougou weather station located 53 km away has a comparable temperature profile to Nouna. Hourly data were averaged to give a daily temperature. The raw time-series consisted of 25% missing t-mean, 14% t-max and 17% t-min. We created an imputation algorithm by averaging 15 consecutive days of temperature either side of a missing temperature value to create a 30-day moving average. The Time Indexes and Time Indexed Series (tis) package v.1.30 was applied in R software to impute missing temperature values.

### Statistical modelling

We applied time-series quasi-Poisson regression analysis, using a distributed lag non-linear model (DLNM) to investigate the non-linear association between maximum daily temperature and the relative risk (RR) of NCD-YLL.

A natural cubic spline with eight degrees of freedom per year was applied to control for season and long-term time-trends. A heaping effect was found in the raw data (Supplementary Table 5 and Supplementary Figure 1-2), where deaths of an unknown date were assigned to the 9<sup>th</sup> day of the corresponding month. An indicator variable was added to mark and control for heaping of deaths and day of the week. The DLNM captured the immediate and delayed effects of temperature (lags) on health, known as the lag-response association as single lag days, or as it cumulates over time. The exposure-response curve was modelled with a natural cubic spline with knots placed at the 10<sup>th</sup>, 50<sup>th</sup> and 90<sup>th</sup> percentiles. The lag-response was modelled with a natural cubic spline of two degrees of freedom, resulting in default knot placement equally along a logarithmic scale. The model equation was:

$$E(Y_t) = \beta_o + s(T, timedf) + f(X_{tmax}, lagdf, vardf) + DOW + HP$$

$$E(Y_t) \sim \text{quasi - Poisson} \quad [3]$$

where:

$E(Y_t)$  is the daily YLL

$\beta_o$  is the y intercept

$s(T, timedf)$  is the smooth function of time with specified df  $timedf$

$f(X_{tmax}, lagdf, vardf)$  is the cross-basis function of t-max and the associated lag dimension with  $vardf$  and  $lagdf$  degrees of freedom respectively. DOW accounts for day of week and HP for the heaping effect.

From the RR, absolute values of excess mean daily NCD-YLL were calculated as:

$$(\text{Average daily NCD - YLL} \times RR) - \text{Average daily NCD - YLL} \quad [4]$$

1  
2  
3 All effect estimates were presented against the median t-max of 36.4°C either as  
4 overall 4-day and 14-day cumulative RRs (and corresponding excess mean daily  
5 NCD-YLL), or single-day lags extending to 14 days.  
6  
7

8  
9  
10 Several sensitivity analyses were conducted to test the robustness of altering model  
11 choices including; specifying alternative knot positions for exposure-response at the  
12 10<sup>th</sup>, 75<sup>th</sup> and 90<sup>th</sup>, and 10<sup>th</sup>, 25<sup>th</sup>, 75<sup>th</sup> and 90<sup>th</sup> percentiles, extending degrees of  
13 freedom (df) for the lag-response between 2 to 6df, manipulating control for season  
14 and time-trend ranging between 5-10df, logarithm transformation of YLL and  
15 applying a Gaussian distribution, and extending the lag period to 28 days to assess if  
16 temperature exposure triggered NCD deaths on a longer time scale. Quasi-Akaike  
17 information criteria (QAIC) values were calculated to guide model selection. All  
18 statistical analyses were conducted using *R* software v.3.2.2. Distributed lag non-  
19 linear models were fitted using the DLNM package v.2.2.3.  
20  
21  
22  
23  
24  
25  
26  
27

## 28 Results

29 The 790 NCD deaths correspond to 18,367 YLL over the study period.  
30 Cardiovascular diseases were the largest contributor to NCD-YLL, accounting for  
31 9095 or 50% of all NCD-YLL. Digestive disorders, malignant neoplasms,  
32 genitourinary and neuropsychiatric conditions also contributed substantially towards  
33 NCD-YLL. Interestingly, endocrine disorders (including diabetes mellitus) formed a  
34 very small proportion (1%) of all NCD-YLL (**Table 1**). **Table 2** shows that maximum  
35 mortality peaked at five deaths per day, corresponding to 154 daily NCD-YLL. Daily  
36 mean NCD-YLL were 4.6, 2.4 and 2.1 person-years for all-ages, males and females,  
37 respectively. Maximum daily temperature was 36.4°C at the 50<sup>th</sup> percentile, peaking  
38 at 43.9°C in the study period.  
39  
40  
41  
42  
43  
44  
45  
46  
47

48 **Figure 1** shows 3D graphs of the RR of NCD-YLL at a range of maximum  
49 temperature and lag values, centred at the reference temperature of 36.4°C (all RRs  
50 and excess mean daily NCD-YLL in the results are given as a comparison to this  
51 reference temperature). All-age (panel A) and male (panel B) plots showed a strong  
52 surge in the RR with high temperature close to the time of heat exposure. Males  
53 presented no noticeable effect with colder temperature. In contrast, women (panel C)  
54  
55  
56  
57  
58  
59  
60

1  
2  
3 and the all-age group showed more prominent health effects with cooler temperatures,  
4 which increased at longer lags.  
5  
6

7  
8 The main results were the 4- and 14-day cumulative (**Figure 2**) and single-day lagged  
9 RR of NCD-YLL (**Figure 3**), from which daily excess mean NCD-YLL was  
10 calculated. Heat effects on NCD-YLL were felt strongly in Nouna above the 50<sup>th</sup>  
11 percentile. Over four cumulative days, exposure to moderate temperature (90<sup>th</sup>  
12 percentile at 41.3°C) was associated with a statistically significant increase of excess  
13 mean daily NCD-YLL by 4.44 (0.24 to 12.28) for all-ages, 3.73 (0.33 to 11.39) for  
14 males, but remained statistically insignificant for females 0.43 (-1.08 to 4.16). In  
15 comparison to the 90<sup>th</sup> percentile, excess mean daily NCD-YLL increased slightly at  
16 95<sup>th</sup> percentile (41.7°C) for all ages and males, but not females (**Table 3b**). Extreme  
17 heat exposure (99<sup>th</sup> percentile) over four days increased excess daily mean NCD-YLL  
18 for all-ages to 7.39 (0.32 to 24.62) and 8.65 (1.07 to 32.73) for males in contrast to the  
19 minimal increase for females; 0.12 (-1.48 to 5.86). Extending the cumulative effect to  
20 14 days also resulted in elevated excess daily mean NCD-YLL, but wider 95%  
21 confidence bounds rendered the effect estimates for all three groups statistically  
22 insignificant.  
23  
24

25  
26 Across 14 individual lag days (**Figure 3**), the largest heat effects were felt  
27 immediately (at lag 0); excess daily mean NCD-YLL were 0.81 (0.13 to 1.59) for all-  
28 ages, 0.58 (0.11 to 1.15) for males, and 0.15 (-0.25 to 0.63) for females at 41.7°C  
29 (**Table 4b**). Heat effects tapered after lag 0, but remained statistically significant to  
30 lag 4 at 41.7°C for all-ages and males. For the 95<sup>th</sup> percentile, a gradual reduction in  
31 excess daily mean NCD-YLL (statistically insignificant) was observed up to 8-10 lag  
32 days for all-ages, males and females with no subsequent increase.  
33  
34

35  
36 A reduction in temperature to 30°C (**Figure 3**), resulted in a slightly protective effect  
37 at shorter lags (0-5), but after 14 days the excess daily NCD-YLL were slightly  
38 elevated for all subgroup; 0.13 (-0.21 to 0.49) for all-ages; 0.06 (-0.17 to 0.32) for  
39 males; and 0.11 (-0.11 to 0.34) for females (**Table 4b**). Females were the only group  
40 to present a statistically significant increase in mean daily NCD-YLL with extreme  
41 cold (1<sup>st</sup> percentile) at lag 13 and 14 (**Supplementary Table 8b**).  
42  
43  
44  
45  
46  
47  
48  
49  
50  
51  
52  
53  
54  
55  
56  
57  
58  
59  
60

1  
2  
3 Excess mean daily NCD-YLL were elevated with heat exposure for the 65+ age  
4 group, however, the low sample size produced very large confidence bounds (i.e. 0.14  
5 (-0.89 to 86.35) at 38.9°C versus 36.4°C.  
6  
7

8  
9  
10 Several sensitivity analyses were conducted to validate model selection, including  
11 generating QAIC, where lower QAIC indicate better model fit (**Supplementary**  
12 **Tables 9 and 10**). Because increasing the df produces lower QAIC values, we used  
13 prior examples to achieve a balance in controlling for season and long-term trend to 8  
14 df per year [9]. Applying 7 df per year, as used in other studies did not greatly affect  
15 the risk estimates [20,21]. The natural cubic spline produced lower QAIC in  
16 comparison to the more flexible cubic B-spline. Varying knot position and numbers  
17 for the exposure-response relationship also did not vary effect estimates. Using 3 df  
18 for the lag-response relationship produced the classic reversed J curve expected for  
19 heat effects, however, 2 df generated lower QAICs indicating better model fit. There  
20 was no evidence of autocorrelation (**Supplementary Figures 6-7**).  
21  
22  
23  
24  
25  
26  
27  
28

### 29 **Discussion**

30  
31 A central finding of this study was that excess premature deaths from NCD increased  
32 with moderate and extreme heat in rural Sub Saharan Africa. The magnitude of health  
33 effects worsened with heat intensity. The largest increase in excess premature  
34 mortality from NCD occurred rapidly, on the day of heat exposure (lag 0), and  
35 diminished in statistical significance after 4 days. The effects of heat on NCD-YLL  
36 were greater in males in comparison to females.  
37  
38  
39  
40  
41  
42

43 In Nairobi, Kenya, increase in temperature over 14 days from 26°C to 30°C resulted  
44 in 3.3 (95% CI -19.7 to 26.4) YLL per day, but from *all causes* [12]. Similarly, a  
45 change in temperature from the 50<sup>th</sup> to 75<sup>th</sup> percentile (36.4 to 38.9°C) in Nouna  
46 resulted in 3.01 (-0.84 to 10.82) excess daily *NCD-YLL* over 14 days. Unlike Nouna,  
47 the temperature in Nairobi does not typically exceed 40°C. As the only existing  
48 African study presenting outcomes as YLL, the comparison presented here indicated  
49 ~3 daily YLL in Nouna and Nairobi with a similar temperature increase.  
50 Unfortunately, a direct contrast of results between these two African studies is limited  
51 because YLL in Nouna were from NCD only, but from all causes of death in Nairobi.  
52  
53  
54  
55  
56  
57  
58  
59  
60

1  
2  
3 In Australia and China heat exposure increased the YLL from cardiovascular disease.  
4 A total of 45 years were lost daily from cardiovascular disease (95% CI 22 to 67  
5 years) in Brisbane, Australia, at a mean temperature of 32°C versus 24°C [18]. In  
6 Guangzhou, China (lag 0-14), a change in mean temperature from the 75<sup>th</sup> (28°C) to  
7 99<sup>th</sup> percentile (32°C) resulted in 4.81 (-2.25 to 11.88) daily YLL from cardiovascular  
8 disease [20]. Cardiovascular disease contributed to 50% of YLL in Nouna. Although  
9 subgroup analysis of NCD was limited by sample size in Nouna, the magnitude of  
10 effects was closer to Guangzhou than Brisbane; 4.07 (-2.73 to 35.66) and 7.39 (0.32  
11 to 24.62) mean daily YLLs were found from *all NCD* at lag 0-14 and lag 0-4  
12 respectively at the 50<sup>th</sup> versus 99<sup>th</sup> percentile. Heat can exacerbate cardiovascular  
13 strain, through increased cardiac output, blood viscosity and coagulation, attenuated  
14 vasoconstriction, and cerebral perfusion pressure [22]. Our findings agree with those  
15 from Guangzhou and Brisbane [18,20], where heat effects occurred rapidly at lag 0,  
16 lasting a maximum of 4 days. In contrast to Brisbane, Nouna and Guangzhou  
17 exhibited fewer YLL for a similar age and temperature shift. All sites used regional or  
18 local life tables to calculate YLL rather than global life tables, so the elevated YLL in  
19 Brisbane are unlikely to be attributable to lower life expectancy in Nouna compared  
20 to Brisbane. Unlike Brisbane, the predominant cause of death in Nouna is still  
21 infectious disease; most days in the Nouna time series exhibited no YLL from NCD.  
22 Temperature-related premature death from NCD could increase in Nouna as the  
23 epidemiological transition progresses, increasing the proportion of deaths attributable  
24 to NCD in the future.

25  
26  
27  
28  
29  
30  
31  
32  
33  
34  
35  
36  
37  
38  
39  
40  
41 Daily respiratory YLL increased by 2.81 (-1.54 to 7.16) in Guangzhou at 28°C versus  
42 32°C [20] where infectious and chronic respiratory deaths were grouped together as  
43 ICD-10 J00-99. In this analysis, however, chronic respiratory YLL (ICD-10 J30-98)  
44 only contributed to 2% of total NCD-YLL in Nouna. The separation of chronic and  
45 acute respiratory outcomes maybe relevant for comparing findings from different  
46 studies and understanding the causal mechanisms. Digestive, renal and  
47 neuropsychiatric causes contributed substantially to overall NCD-YLL in Nouna.  
48 Heat is known to trigger renal [23] and mental health-related deaths [24], however,  
49 the link to chronic digestive causes requires further investigation.  
50  
51  
52  
53  
54  
55  
56  
57  
58  
59  
60

1  
2  
3 Although excess NCD-YLL for women was elevated with heat exposure, male NCD-  
4 YLL were affected by a greater magnitude at lag 0-2. One explanation is that men  
5 working outdoors might have higher exposed to ambient heat. Occupational stress has  
6 been associated with excess risk of NCD morbidity including psychological  
7 distress[25] and kidney disease [26]. These results are somewhat unexpected  
8 considering that women in Nouna are exposed to extra heat from cooking and  
9 carrying wood/water for 2-3 hours daily. Women might die prematurely from other  
10 causes such as childbirth, leaving men to be more affected by diseases associated with  
11 longevity such as cardiovascular disease, however, further investigation of gender  
12 differences is warranted.  
13  
14  
15  
16  
17  
18  
19  
20

21 Contrary to findings across 14 European cities [27], we found no evidence of  
22 harvesting effects with heat; gradual reduction in YLL across lag days ensuing the  
23 initial surge were not associated with significant subsequent negative associations or a  
24 rise again in risk estimates for any subgroups [28]. The public health relevance of our  
25 findings is therefore enhanced, as premature NCD mortality is not merely the  
26 advancement of death in frail individuals with pre-existing chronic conditions.  
27  
28  
29  
30  
31  
32

33 This study has several strengths. An 11-year time series of reliable, high-quality data  
34 from a rural African setting was used to quantify the burden of temperature on NCD-  
35 YLL. Variables such as the date, age and cause of death were subject to quality  
36 checks and continuous improvements at International Network for the Demographic  
37 Evaluation of Populations and Their Health (INDEPTH) sites including Nouna. These  
38 processes enabled one of the best quality and most extensive longitudinal health  
39 datasets in Africa and Asia to be used for this study. The DLNM accounted for non-  
40 linearity and lagged effects. In place of relative risks which would have been obtained  
41 had only death counts been used, combining life expectancy and death counts gave an  
42 absolute value for YLL from NCD, which is relevant for policy making [29]. Despite  
43 the low number of NCD deaths, significant effects of heat on premature mortality  
44 were detected, indicating that the effects were strong. The results in the final model  
45 were robust and withstood variations of model parameters. Rather than focusing only  
46 on anomalous weather events such as heatwaves, one of the longest time series  
47 available in rural Africa was exploited to highlight that excess premature deaths from  
48 NCD does not only occur during extreme heat, but with moderate heat.  
49  
50  
51  
52  
53  
54  
55  
56  
57  
58  
59  
60



1  
2  
3  
4  
5  
6  
7  
8  
9  
10  
11  
12  
13  
14  
15  
16  
17  
18  
19  
20  
21  
22  
23  
24  
25  
26  
27  
28  
29  
30  
31  
32  
33  
34  
35  
36  
37  
38  
39  
40  
41  
42  
43  
44  
45  
46  
47  
48  
49  
50

Some limitations are also noted. Caution should be exercised in generalising these findings to all rural African settings. Temperature data were obtained from the nearest location with a similar temperature profile to Nouna. The lower resolution and distribution of weather data in Burkina Faso compared to Organisation for Economic Co-operation and Development (OECD) countries can make it challenging to obtain suitable weather data in Burkina Faso. Public health scientists ought to address this challenge by extending research beyond where the data are best, to where problems are the greatest and research/solutions most needed. It is likely that cancer or mental disorders were under-reported as sophisticated questionnaires and tests are needed to establish these causes. In 2004, the World Health Organization (WHO) estimated that NCD accounted for 20% of the burden of disease in Burkina Faso as a percentage of total DALYs (disability adjusted life years), which captures both premature death and life lived with disease [30]. We found only 7% of the burden from premature deaths or YLL in Nouna were from NCD. Although the YLL component of DALYs in the WHO estimate were obtained by multiplying the number of deaths at each age by the global standard life expectancy for each age (rather than the regional life expectancy for each age), the sole use of premature death is likely to have missed substantial burden from life lived with disease. Causal studies on the temperature-NCD association would benefit from using DALYs or quality adjusted life years (QALY) as the outcome measure, considering a large proportion of the burden of NCD comes from life lived with disease. The YLL lifetable approach does not differentiate health and sociodemographic risk profiles for each individual. Unfortunately, the sample size was insufficient to further stratify NCD by age (i.e. elderly) or subgroups such as cardiovascular causes. The use of longer time series in the future with larger sample sizes is likely to enable such breakdowns by cause or age, reducing the uncertainty from wide confidence bounds, and supporting better quantification of heat impacts on NCD-YLL.

## 51 **Conclusion**

52  
53  
54  
55  
56  
57  
58  
59  
60

In rural Sub Saharan Africa, where NCD are not the main cause of premature death, we found that moderate and extreme heat exposure significantly increases excess daily premature mortality from NCD. As NCD prevalence increases in Africa due to demographic, dietary and lifestyle changes, climate change will increasingly



1  
2  
3 contribute as a risk factor towards the burden of deaths from NCD. Subsistence  
4 farming communities in Africa, such as Nouna, would therefore benefit from the  
5 development of early preventive measures to curb heat-associated NCD deaths.  
6  
7  
8

### 9 10 **Competing interests**

11 The authors declare they have no actual or potential competing financial interests  
12  
13

### 14 15 **Acknowledgments**

16 We thank Dr David Hondula for help obtaining temperature data from the National  
17 Climatic Data Centre, USA, and Drs Adrian Barnett and Cunrui Huang for statistical  
18 modelling advice.  
19  
20  
21

### 22 23 **Funding**

24 AB was funded by the Klaus-Tschira Stiftung gGmbH (00.128.2008). Funders had no  
25 direct role in study design, data collection, data analysis, interpretation or writing of  
26 the report.  
27  
28  
29

### 30 31 **Data sharing**

32 No additional data are available.  
33  
34  
35

### 36 37 **Author contributions**

38 AB and RS developed the research idea with input from JR. Data were provided by  
39 AS. AB, MOS, JR and RS developed the modelling strategy. AB conducted the  
40 analysis, which was verified by MOS and RJ. AB wrote the manuscript. All authors  
41 contributed to revision of the manuscript.  
42  
43  
44  
45  
46  
47  
48  
49  
50  
51  
52  
53  
54  
55  
56  
57  
58  
59  
60

## References

- 1 Niang I, Ruppel OC, Abdrabo MA, *et al.* Africa. In: Climate Change 2014: Impacts, Adaptation, and Vulnerability. Part B: Regional Aspects. Contribution of Working Group II to the Fifth Assessment Report of the Intergovernmental Panel on Climate Change. Cambridge University Press, Cambridge, United Kingdom and New York, NY, USA: 2014.
- 2 Hondula DM, Rocklöv J, Sankoh OA. Past, present, and future climate at select INDEPTH member Health and Demographic Surveillance Systems in Africa and Asia. *Glob Health Action* 2012;**5**:617–86.
- 3 Abegunde DO, Mathers CD, Adam T, *et al.* The burden and costs of chronic diseases in low-income and middle-income countries. *Lancet* 2007;**370**:1929–38.
- 4 World Health Organization. Burkina Faso. Non-communicable Diseases (NCD) Country Profiles: 2014. [http://www.who.int/nmh/countries/bfa\\_en.pdf](http://www.who.int/nmh/countries/bfa_en.pdf) (accessed 12 May 2016).
- 5 Friel S, Bowen K, Campbell-Lendrum D, *et al.* Climate Change, Noncommunicable Diseases, and Development: The Relationships and Common Policy Opportunities. *Annual review of public health* 2011;**32**:133–47.
- 6 D'Ippoliti D, Michelozzi P, Marino C, *et al.* The impact of heat waves on mortality in 9 European cities: results from the EuroHEAT project. *Environ Health* 2010;**9**:37.
- 7 Fouillet A, Rey G, Laurent F, *et al.* Excess mortality related to the August 2003 heat wave in France. *Int Arch Occup Environ Health* 2006;**80**:16–24.
- 8 IPCC. Summary for Policymakers. In: *Climate Change 2013: The Physical Science Basis. Contribution of Working Group I to the Fifth Assessment Report of the Intergovernmental Panel on Climate Change*. Cambridge University Press, Cambridge, United Kingdom and New York, NY, USA: 2013
- 9 Gasparrini A, Guo Y, Hashizume M, *et al.* Mortality risk attributable to high and low ambient temperature: a multicountry observational study. *Lancet* 2015;**386**:369–75.
- 10 Diboulo E, Sié A, Rocklöv J, *et al.* Weather and mortality: a 10 year retrospective analysis of the Nouna Health and Demographic Surveillance System, Burkina Faso. *Glob Health Action* 2012;**5**:1–8.
- 11 Egondi T, Kyobutungi C, Kovats S, *et al.* Time-series analysis of weather and mortality patterns in Nairobi's informal settlements. *Glob Health Action* 2012;**5**:1–10.
- 12 Egondi T, Kyobutungi C, Rocklöv J. Temperature variation and heat wave and cold spell impacts on years of life lost among the urban poor population of Nairobi, Kenya. *Int J Environ Res Public Health* 2015;**12**:2735–48.

- 1
- 2
- 3 13 Sié A, Louis VR, Gbangou A, *et al.* The Health and Demographic Surveillance
- 4 System (HDSS) in Nouna, Burkina Faso, 1993-2007. *Glob Health Action*
- 5 2010;**3**.
- 6
- 7 14 Ramroth H, Lorenz E, Rankin JC, *et al.* Cause of death distribution with InterVA
- 8 and physician coding in a rural area of Burkina Faso. *Trop Med Int Health*
- 9 2012;**17**:904–13.
- 10
- 11 15 World Health Organization. The Global Burden of Disease. 2004 Update.
- 12 Geneva: World Health Organization: 2008.
- 13
- 14 16 Murray CJ, Lopez AD, editors. The Global Burden of Disease. A comprehensive
- 15 assessment of mortality and disability from diseases, injuries, and risk factors in
- 16 1990 and projected to 2020: 1996.
- 17
- 18 17 Pruss-Ustun A, Mathers C, Corvolan C, *et al.*, editors. Introduction and methods:
- 19 assessing the environmental burden of disease at national and local levels.
- 20 Geneva: 2003.
- 21
- 22 18 Huang C, Barnett AG, Wang X, *et al.* Effects of extreme temperatures on years
- 23 of life lost for cardiovascular deaths: a time series study in Brisbane, Australia.
- 24 *Circ Cardiovasc Qual Outcomes* 2012;**5**:609–14.
- 25
- 26 19 Huang C, Barnett AG, Wang X, *et al.* The impact of temperature on years of life
- 27 lost in Brisbane, Australia. *Nature Climate change* 2012;**2**:265–70.
- 28
- 29 20 Yang J, Ou CQ, Guo Y, *et al.* The burden of ambient temperature on years of life
- 30 lost in Guangzhou, China. *Sci Rep* 2015;**5**:12250.
- 31
- 32 21 Bhaskaran K, Gasparrini A, Hajat S, *et al.* Time series regression studies in
- 33 environmental epidemiology. *Int J Epidemiol* 2013;**42**:1187–95.
- 34
- 35 22 Keatinge WR, Coleshaw SR, Easton JC, *et al.* Increased platelet and red cell
- 36 counts, blood viscosity, and plasma cholesterol levels during heat stress, and
- 37 mortality from coronary and cerebral thrombosis. *Am J Med* 1986;**81**:795–800.
- 38
- 39 23 Semenza JC, McCullough JE, Flanders WD, *et al.* Excess hospital admissions
- 40 during the July 1995 heat wave in Chicago. *Am J Prev Med* 1999;**16**:269–77.
- 41
- 42 24 Basu R, Samet JM. The potential impacts of climate variability and change on
- 43 temperature-related morbidity and mortality in the United States. *Environ Health*
- 44 *Perspect* 2002;**110**:1219–24.
- 45
- 46 25 Tawatsupa B, Lim LL-Y, Kjellstrom T, *et al.* The association between overall
- 47 health, psychological distress, and occupational heat stress among a large
- 48 national cohort of 40,913 Thai workers. *Glob Health Action* 2010;**3**.
- 49
- 50 26 Tawatsupa B, Lim LL-Y, Kjellstrom T, *et al.* Association between occupational
- 51 heat stress and kidney disease among 37,816 workers in the Thai Cohort Study
- 52 (TCS). *J Epidemiol* 2012;**22**:251–60.
- 53
- 54 27 Baccini M, Kosatsky T, Biggeri A. Impact of summer heat on urban population
- 55
- 56
- 57
- 58
- 59
- 60

1  
2  
3 mortality in Europe during the 1990s: an evaluation of years of life lost adjusted  
4 for harvesting. *PLoS ONE* 2013;**8**:e69638.  
5

- 6 28 Basu R, Malig B. High ambient temperature and mortality in California:  
7 exploring the roles of age, disease, and mortality displacement. *Environmental*  
8 *Research* 2011;**111**:1286–92.  
9  
10 29 Murray CJL, Lopez AD. Measuring the Global Burden of Disease. *N Engl J Med*  
11 2013;**369**:448–57.  
12  
13 30 World Health Organization Regional Office for Africa. Health Situation  
14 Analysis in the African Region. Brazzaville: 2011.  
15  
16  
17  
18  
19  
20  
21  
22  
23  
24  
25  
26  
27  
28  
29  
30  
31  
32  
33  
34  
35  
36  
37  
38  
39  
40  
41  
42  
43  
44  
45  
46  
47  
48  
49  
50  
51  
52  
53  
54  
55  
56  
57  
58  
59  
60

| Disease                     | Death count | Death (%)  | YLL count    | YLL (%)    |
|-----------------------------|-------------|------------|--------------|------------|
| Cardiovascular diseases     | 461         | 58         | 9095         | 50         |
| Digestive diseases          | 137         | 17         | 3614         | 20         |
| Malignant neoplasms         | 81          | 10         | 1720         | 9          |
| Genitourinary diseases      | 38          | 5          | 1602         | 9          |
| Neuropsychiatric conditions | 37          | 5          | 1289         | 7          |
| Congenital anomalies        | 8           | 1          | 481          | 3          |
| Respiratory diseases        | 15          | 2          | 321          | 2          |
| Diabetes mellitus           | 11          | 1          | 167          | 1          |
| Other endocrine disorders   | 1           | 0          | 22           | 0          |
| Musculoskeletal diseases    | 1           | 0          | 57           | 0          |
| <b>Total</b>                | <b>790</b>  | <b>100</b> | <b>18367</b> | <b>100</b> |

**Table 1:** Cause specific NCD outcomes with corresponding deaths and years of life lost. NCD accounted for 12% of total deaths, and 7% of total YLL in Nouna between 2000-2010.

| Daily NCD and temperature descriptive statistics 2000-2010 |         |      |      |      |      |         |
|------------------------------------------------------------|---------|------|------|------|------|---------|
|                                                            | Minimum | 25%  | 50%  | Mean | 75%  | Maximum |
| <b>Daily number of NCD deaths</b>                          |         |      |      |      |      |         |
| <b>Total</b>                                               | 0       | 0    | 0    | 0.2  | 0    | 5       |
| <b>Male</b>                                                | 0       | 0    | 0    | 0.1  | 0    | 4       |
| <b>Female</b>                                              | 0       | 0    | 0    | 0.1  | 0    | 3       |
| <b>&gt;65 years</b>                                        | 0       | 0    | 0    | 0.1  | 0    | 3       |
| <b>Daily NCD years of life lost</b>                        |         |      |      |      |      |         |
| <b>Total</b>                                               | 0       | 0    | 0    | 4.6  | 0    | 154     |
| <b>Male</b>                                                | 0       | 0    | 0    | 2.4  | 0    | 118.9   |
| <b>Female</b>                                              | 0       | 0    | 0    | 2.1  | 0    | 127.5   |
| <b>&gt;65 years</b>                                        | 0       | 0    | 0    | 0.9  | 0    | 39.2    |
| <b>Temperature (°C)</b>                                    |         |      |      |      |      |         |
| <b>Daily minimum</b>                                       | 3.3     | 21.1 | 22.8 | 23.1 | 25   | 32.8    |
| <b>Daily average</b>                                       | 17.2    | 27.5 | 29.2 | 29.6 | 31.7 | 37.8    |
| <b>Daily maximum</b>                                       | 22.8    | 33.3 | 36.4 | 36.1 | 38.9 | 43.9    |

**Table 2:** Summary statistics of daily NCD deaths, NCD years of life lost and temperature in Nouna, Burkina Faso between 2000-2010.

|                           | 27.8°C<br>(1st percentile) | 30°C<br>(5th percentile) | 31.1°C<br>(10th percentile) | 33.3°C<br>(25th percentile) | 38.9°C<br>(75th percentile) | 41.4°C<br>(90th percentile) | 41.7°C<br>(95th percentile) | 42.8°C<br>(99th percentile) |
|---------------------------|----------------------------|--------------------------|-----------------------------|-----------------------------|-----------------------------|-----------------------------|-----------------------------|-----------------------------|
|                           | 34 days below 27.8°C       | 174 days below 30°C      | 325 days below 31.3°C       | 912 days below 33.3°C       | 883 days above 38.9°C       | 300 days above 41.4°C       | 189 days above 41.7°C       | 28 days above 42.8°C        |
|                           | RR (95% CI)                | RR (95% CI)              | RR (95% CI)                 | RR (95% CI)                 | RR (95% CI)                 | RR (95% CI)                 | RR (95% CI)                 | RR (95% CI)                 |
| <b>Lag structure 0-4</b>  |                            |                          |                             |                             |                             |                             |                             |                             |
| All age                   | 0.54 (0.22 to 1.36)        | 0.82 (0.56 to 1.21)      | 0.93 (0.72 to 1.21)         | 1.00 (0.99 to 1.01)         | 1.29 (0.81 to 2.04)         | 1.96 (1.05 to 3.67)         | 2.08 (1.08 to 4.01)         | 2.61 (1.07 to 6.35)         |
| Male                      | 0.53 (0.15 to 1.86)        | 0.77 (0.46 to 1.3)       | 0.88 (0.62 to 1.25)         | 1.00 (0.99 to 1.01)         | 1.36 (0.74 to 2.49)         | 2.56 (1.14 to 5.75)         | 2.86 (1.23 to 6.69)         | 4.60 (1.45 to 14.64)        |
| Female                    | 0.38 (0.10 to 1.41)        | 0.81 (0.47 to 1.4)       | 0.99 (0.68 to 1.43)         | 1.00 (0.99 to 1.01)         | 1.05 (0.54 to 2.04)         | 1.20 (0.49 to 2.98)         | 1.19 (0.46 to 3.05)         | 1.06 (0.30 to 3.79)         |
| <b>Lag structure 0-14</b> |                            |                          |                             |                             |                             |                             |                             |                             |
| All age                   | 0.89 (0.22 to 3.67)        | 0.94 (0.53 to 1.65)      | 0.96 (0.64 to 1.42)         | 1.00 (0.99 to 1.01)         | 1.65 (0.82 to 3.35)         | 1.98 (0.71 to 5.54)         | 1.98 (0.66 to 5.91)         | 1.88 (0.41 to 8.75)         |
| Male                      | 0.71 (0.11 to 4.63)        | 0.91 (0.43 to 1.94)      | 0.97 (0.57 to 1.66)         | 1.00 (0.99 to 1.01)         | 1.57 (0.62 to 3.97)         | 2.11 (0.57 to 7.85)         | 2.14 (0.53 to 8.70)         | 2.16 (0.29 to 16.35)        |
| Female                    | 1.24 (0.16 to 9.27)        | 1.09 (0.49 to 2.46)      | 1.05 (0.59 to 1.84)         | 1.00 (0.98 to 1.02)         | 1.42 (0.50 to 3.99)         | 1.28 (0.28 to 5.97)         | 1.21 (0.24 to 6.17)         | 0.92 (0.10 to 8.30)         |

**Table 3a:** Cumulative relative risk (and 95% confidence bounds) of maximum temperature on non-communicable disease years of life lost in Nouna stratified across lag 0-4 and lag 0-14 days and gender between 2000-2010. Relative risks are presented for; heat effects as 38.9°C, 41.1°C and 41.7°C with reference to 36.4°C; cold effects as 30°C, 31.1°C and 33.3°C with reference to 36.4°C. Results controlled for long-term trends, season, day of the week, and heaping effect.

|                           | 27.8°C<br>(1st percentile) | 30°C<br>(5th percentile) | 31.1°C<br>(10th percentile) | 33.3°C<br>(25th percentile) | 38.9°C<br>(75th percentile) | 41.4°C<br>(90th percentile) | 41.7°C<br>(95th percentile) | 42.8°C<br>(99th percentile) |
|---------------------------|----------------------------|--------------------------|-----------------------------|-----------------------------|-----------------------------|-----------------------------|-----------------------------|-----------------------------|
|                           | 34 days below 27.8°C       | 174 days below 30°C      | 325 days below 31.3°C       | 912 days below 33.3°C       | 883 days above 38.9°C       | 300 days above 41.4°C       | 189 days above 41.7°C       | 28 days above 42.8°C        |
|                           | YLL (95% CI)               | YLL (95% CI)             | YLL (95% CI)                | YLL (95% CI)                | YLL (95% CI)                | YLL (95% CI)                | YLL (95% CI)                | YLL (95% CI)                |
| <b>Lag structure 0-4</b>  |                            |                          |                             |                             |                             |                             |                             |                             |
| All age                   | -2.11 (-3.61 to 1.64)      | -0.81 (-2.02 to 0.97)    | -0.31 (-1.30 to 0.97)       | 0.00 (-0.03 to 0.03)        | 1.33 (-0.86 to 4.80)        | 4.44 (0.24 to 12.28)        | 4.98 (0.38 to 13.83)        | 7.39 (0.32 to 24.62)        |
| Male                      | -1.13 (-2.04 to 2.06)      | -0.55 (-1.30 to 0.72)    | -0.29 (-0.92 to 0.59)       | 0.00 (-0.03 to 0.02)        | 0.86 (-0.62 to 3.57)        | 3.73 (0.33 to 11.39)        | 4.48 (0.54 to 13.65)        | 8.65 (1.07 to 32.73)        |
| Female                    | -1.30 (-1.88 to 0.86)      | -0.39 (-1.11 to 0.85)    | -0.03 (-0.66 to 0.90)       | 0.01 (-0.01 to 0.03)        | 0.10 (-0.97 to 2.19)        | 0.43 (-1.08 to 4.16)        | 0.39 (-1.13 to 4.32)        | 0.12 (-1.48 to 5.86)        |
| <b>Lag structure 0-14</b> |                            |                          |                             |                             |                             |                             |                             |                             |
| All age                   | -0.48 (-3.6 to 12.27)      | -0.28 (-2.15 to 3.01)    | -0.20 (-1.64 to 1.95)       | -0.01 (-0.06 to 0.04)       | 3.01 (-0.84 to 10.82)       | 4.53 (-1.33 to 20.89)       | 4.5 (-1.55 to 22.57)        | 4.07 (-2.73 to 35.66)       |
| Male                      | -0.70 (-2.14 to 8.71)      | -0.21 (-1.37 to 2.25)    | -0.06 (-1.03 to 1.58)       | 0.00 (-0.04 to 0.04)        | 1.38 (-0.90 to 7.12)        | 2.67 (-1.03 to 16.44)       | 2.74 (-1.14 to 18.48)       | 2.78 (-1.72 to 36.83)       |
| Female                    | 0.50 (-1.75 to 17.37)      | 0.20 (-1.08 to 3.07)     | 0.09 (-0.86 to 1.77)        | 0.00 (-0.03 to 0.03)        | 0.87 (-1.05 to 6.28)        | 0.59 (-1.52 to 10.44)       | 0.44 (-1.60 to 10.86)       | -0.18 (-1.89 to 15.32)      |

**Table 3b:** Cumulative excess average daily NCD-YLL (and 95% confidence bounds) stratified across lag 0-4 and lag 0-14 days and gender between 2000-2010. Relative risks were used to calculate excess average daily NCD-YLL as follows: (Average daily NCD-YLL of all-age, male or female \* relative risk) – Average daily NCD-YLL. NCD-YLL are presented for; heat effects as 42.8°C, 38.9°C, 41.1°C and 41.7°C with reference to 36.4°C; cold effects as 30°C, 31.1°C, 33.3°C and 27.8°C with reference to 36.4°C. Results controlled for long-term trends, season, day of the week, and heaping effect.



|       | All age               |                          | Male                  |                          | Female                |                          |
|-------|-----------------------|--------------------------|-----------------------|--------------------------|-----------------------|--------------------------|
|       | 30°C (5th percentile) | 41.7°C (95th percentile) | 30°C (5th percentile) | 41.7°C (95th percentile) | 30°C (5th percentile) | 41.7°C (95th percentile) |
|       | RR (95% CI)           |                          | RR (95% CI)           |                          | RR (95% CI)           |                          |
| lag0  | 0.96 (0.89 to 1.04)   | 1.18 (1.03 to 1.35)      | 0.96 (0.87 to 1.07)   | 1.24 (1.04 to 1.48)      | 0.96 (0.86 to 1.08)   | 1.07 (0.88 to 1.30)      |
| lag1  | 0.97 (0.90 to 1.04)   | 1.16 (1.03 to 1.31)      | 0.97 (0.88 to 1.06)   | 1.21 (1.04 to 1.42)      | 0.97 (0.88 to 1.07)   | 1.06 (0.89 to 1.27)      |
| lag2  | 0.97 (0.91 to 1.04)   | 1.14 (1.02 to 1.27)      | 0.97 (0.9 to 1.05)    | 1.19 (1.03 to 1.36)      | 0.98 (0.89 to 1.07)   | 1.05 (0.90 to 1.24)      |
| lag3  | 0.98 (0.92 to 1.03)   | 1.12 (1.01 to 1.23)      | 0.98 (0.91 to 1.05)   | 1.16 (1.02 to 1.31)      | 0.98 (0.91 to 1.06)   | 1.05 (0.91 to 1.21)      |
| lag4  | 0.98 (0.94 to 1.03)   | 1.10 (1.01 to 1.20)      | 0.98 (0.92 to 1.05)   | 1.13 (1.01 to 1.27)      | 0.99 (0.92 to 1.06)   | 1.04 (0.91 to 1.18)      |
| lag5  | 0.99 (0.94 to 1.03)   | 1.08 (1.00 to 1.17)      | 0.99 (0.93 to 1.04)   | 1.10 (1.00 to 1.22)      | 0.99 (0.93 to 1.06)   | 1.03 (0.91 to 1.16)      |
| lag6  | 0.99 (0.95 to 1.03)   | 1.06 (0.99 to 1.15)      | 0.99 (0.94 to 1.04)   | 1.08 (0.98 to 1.19)      | 1.00 (0.94 to 1.06)   | 1.02 (0.91 to 1.14)      |
| lag7  | 1.00 (0.96 to 1.03)   | 1.05 (0.97 to 1.13)      | 0.99 (0.95 to 1.05)   | 1.05 (0.96 to 1.16)      | 1.01 (0.95 to 1.06)   | 1.01 (0.91 to 1.13)      |
| lag8  | 1.00 (0.96 to 1.04)   | 1.03 (0.96 to 1.11)      | 1.00 (0.95 to 1.05)   | 1.03 (0.93 to 1.13)      | 1.01 (0.96 to 1.07)   | 1.00 (0.90 to 1.12)      |
| lag9  | 1.00 (0.96 to 1.05)   | 1.01 (0.94 to 1.10)      | 1.00 (0.95 to 1.06)   | 1.00 (0.91 to 1.11)      | 1.02 (0.96 to 1.08)   | 1.00 (0.89 to 1.12)      |
| lag10 | 1.01 (0.96 to 1.06)   | 1.00 (0.91 to 1.09)      | 1.01 (0.95 to 1.07)   | 0.98 (0.88 to 1.09)      | 1.02 (0.96 to 1.09)   | 0.99 (0.87 to 1.12)      |
| lag11 | 1.01 (0.96 to 1.07)   | 0.98 (0.89 to 1.08)      | 1.01 (0.94 to 1.08)   | 0.96 (0.85 to 1.08)      | 1.03 (0.96 to 1.11)   | 0.98 (0.85 to 1.13)      |
| lag12 | 1.02 (0.96 to 1.08)   | 0.96 (0.86 to 1.07)      | 1.02 (0.94 to 1.10)   | 0.93 (0.81 to 1.07)      | 1.04 (0.96 to 1.12)   | 0.97 (0.83 to 1.14)      |
| lag13 | 1.02 (0.96 to 1.09)   | 0.95 (0.84 to 1.07)      | 1.02 (0.93 to 1.12)   | 0.91 (0.78 to 1.06)      | 1.04 (0.95 to 1.14)   | 0.97 (0.81 to 1.15)      |
| lag14 | 1.03 (0.96 to 1.11)   | 0.93 (0.82 to 1.06)      | 1.03 (0.93 to 1.13)   | 0.89 (0.75 to 1.06)      | 1.05 (0.95 to 1.16)   | 0.96 (0.79 to 1.16)      |

**Table 4a:** Relative risk (and 95% confidence bounds) of maximum temperature on non-communicable disease years of life lost in Nouna stratified by individual lag days for all age, males and females between 2000-2010. Relative risks are presented for heat effects as 41.7°C (95<sup>th</sup> percentile) with reference to 36.4°C, cold effects as 30°C (5<sup>th</sup> percentile) with reference to 36.4°C. Results controlled for long-term trends, season, day of the week, and heaping effect.

|              | All age               |                          | Male                  |                          | Female                |                          |
|--------------|-----------------------|--------------------------|-----------------------|--------------------------|-----------------------|--------------------------|
|              | 30°C (5th percentile) | 41.7°C (95th percentile) | 30°C (5th percentile) | 41.7°C (95th percentile) | 30°C (5th percentile) | 41.7°C (95th percentile) |
|              | 174 days below 30°C   | 189 days above 41.7°C    | 174 days below 30°C   | 189 days above 41.7°C    | 174 days below 30°C   | 189 days above 41.7°C    |
|              | YLL (95% CI)          |                          | YLL (95% CI)          |                          | YLL (95% CI)          |                          |
| <b>lag0</b>  | -0.16 (-0.50 to 0.20) | 0.81 (0.13 to 1.59)      | -0.09 (-0.31 to 0.16) | 0.58 (0.11 to 1.15)      | -0.08 (-0.29 to 0.16) | 0.15 (-0.25 to 0.63)     |
| <b>lag1</b>  | -0.14 (-0.45 to 0.19) | 0.72 (0.12 to 1.41)      | -0.08 (-0.28 to 0.15) | 0.51 (0.09 to 1.01)      | -0.06 (-0.26 to 0.15) | 0.13 (-0.23 to 0.56)     |
| <b>lag2</b>  | -0.12 (-0.40 to 0.17) | 0.63 (0.09 to 1.24)      | -0.07 (-0.25 to 0.13) | 0.44 (0.07 to 0.87)      | -0.05 (-0.23 to 0.14) | 0.11 (-0.21 to 0.50)     |
| <b>lag3</b>  | -0.10 (-0.35 to 0.16) | 0.55 (0.07 to 1.08)      | -0.06 (-0.22 to 0.12) | 0.38 (0.05 to 0.75)      | -0.04 (-0.20 to 0.13) | 0.10 (-0.20 to 0.43)     |
| <b>lag4</b>  | -0.08 (-0.30 to 0.15) | 0.46 (0.04 to 0.93)      | -0.05 (-0.19 to 0.11) | 0.31 (0.02 to 0.64)      | -0.03 (-0.17 to 0.13) | 0.08 (-0.19 to 0.38)     |
| <b>lag5</b>  | -0.06 (-0.25 to 0.14) | 0.38 (0.00 to 0.79)      | -0.04 (-0.17 to 0.10) | 0.25 (-0.01 to 0.54)     | -0.01 (-0.14 to 0.12) | 0.06 (-0.18 to 0.33)     |
| <b>lag6</b>  | -0.04 (-0.22 to 0.14) | 0.30 (-0.06 to 0.68)     | -0.03 (-0.15 to 0.10) | 0.19 (-0.05 to 0.45)     | 0.00 (-0.12 to 0.12)  | 0.04 (-0.18 to 0.30)     |
| <b>lag7</b>  | -0.02 (-0.19 to 0.16) | 0.21 (-0.12 to 0.58)     | -0.01 (-0.13 to 0.11) | 0.12 (-0.10 to 0.37)     | 0.01 (-0.10 to 0.13)  | 0.03 (-0.19 to 0.27)     |
| <b>lag8</b>  | 0.00 (-0.17 to 0.18)  | 0.13 (-0.20 to 0.50)     | 0.00 (-0.12 to 0.12)  | 0.07 (-0.16 to 0.31)     | 0.03 (-0.09 to 0.14)  | 0.01 (-0.21 to 0.26)     |
| <b>lag9</b>  | 0.02 (-0.16 to 0.21)  | 0.06 (-0.30 to 0.44)     | 0.01 (-0.12 to 0.14)  | 0.01 (-0.22 to 0.26)     | 0.04 (-0.08 to 0.17)  | -0.01 (-0.24 to 0.25)    |
| <b>lag10</b> | 0.04 (-0.16 to 0.26)  | -0.02 (-0.40 to 0.39)    | 0.02 (-0.13 to 0.17)  | -0.05 (-0.30 to 0.23)    | 0.05 (-0.08 to 0.19)  | -0.02 (-0.27 to 0.26)    |
| <b>lag11</b> | 0.06 (-0.17 to 0.31)  | -0.10 (-0.51 to 0.36)    | 0.03 (-0.14 to 0.20)  | -0.10 (-0.37 to 0.2)     | 0.07 (-0.08 to 0.22)  | -0.04 (-0.31 to 0.27)    |
| <b>lag12</b> | 0.08 (-0.18 to 0.36)  | -0.17 (-0.62 to 0.33)    | 0.04 (-0.15 to 0.24)  | -0.16 (-0.45 to 0.17)    | 0.08 (-0.09 to 0.26)  | -0.06 (-0.35 to 0.29)    |
| <b>lag13</b> | 0.11 (-0.19 to 0.42)  | -0.25 (-0.74 to 0.31)    | 0.05 (-0.16 to 0.28)  | -0.21 (-0.52 to 0.15)    | 0.09 (-0.10 to 0.30)  | -0.07 (-0.40 to 0.31)    |
| <b>lag14</b> | 0.13 (-0.21 to 0.49)  | -0.32 (-0.85 to 0.29)    | 0.06 (-0.17 to 0.32)  | -0.26 (-0.60 to 0.13)    | 0.11 (-0.11 to 0.34)  | -0.09 (-0.44 to 0.34)    |

**Table 4b:** Excess average daily NCD-YLL (and 95% confidence bounds) in Nouna stratified by individual lag days for all age, males and females between 2000-2010. Relative risks were used to calculate excess average daily NCD-YLL as follows: (Average daily NCD-YLL of all-age, male or female \* relative risk) – Average daily NCD-YLL. NCD-YLL are presented for heat effects as 41.7°C (95<sup>th</sup> percentile) with reference to 36.4°C, cold effects as 30°C (5<sup>th</sup> percentile) with reference to 36.4°C. Results controlled for long-term trends, season, day of the week, and heaping effect.

A Temperature effect on all age NCD YLL

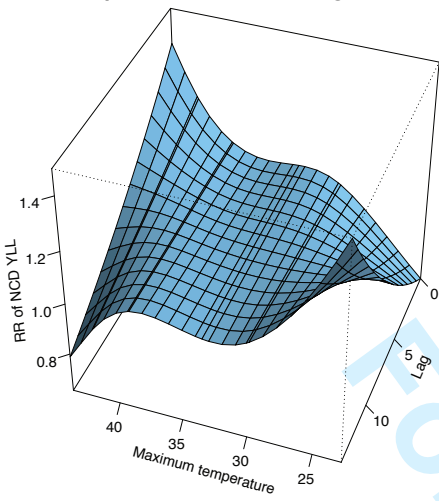

B Temperature effect on NCD male YLL

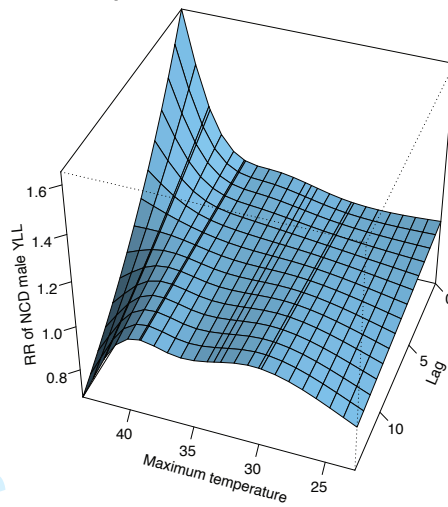

C Temperature effect on NCD female YLL

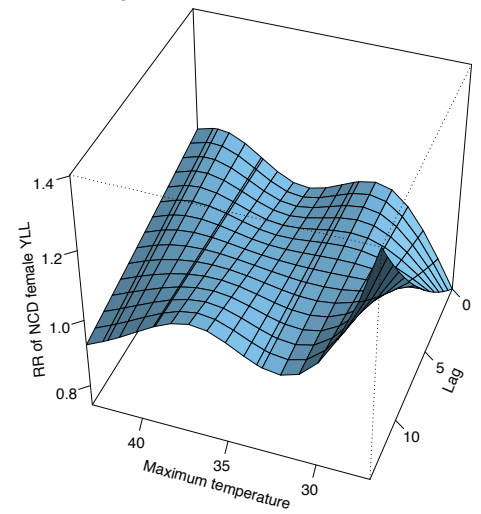

**Figure 1:** Association of RR of NCD-YLL to maximum temperature and lag days, with reference to 36.4°C for all ages, males and females.

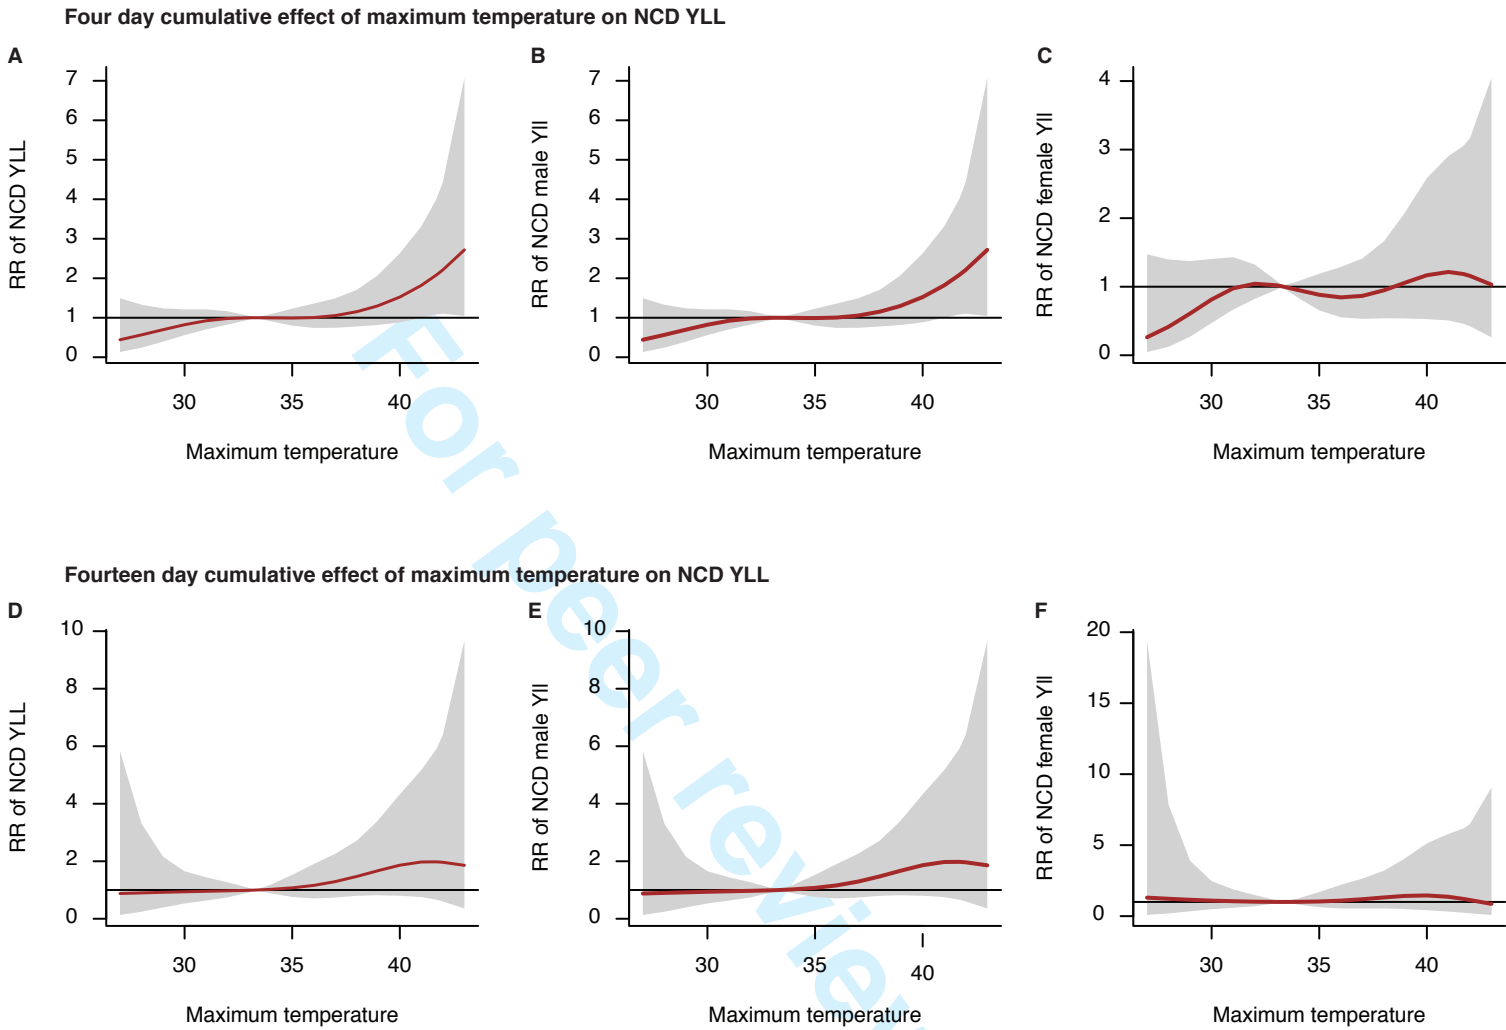

**Figure 2:** Plots of 4-day (panel A-all age, B-male, and C-female), and 14-day (panel D-all age, E-male, and F-female) cumulative RR of NCD-YLL against maximum temperature (solid line) with 95% confidence bounds (grey area) for all ages, males and females in Nouna, Burkina Faso between 2000 and 2010. The reference temperature is 36.4°C. Note: to improve readability of the curves, the scales on the y-axis differ.

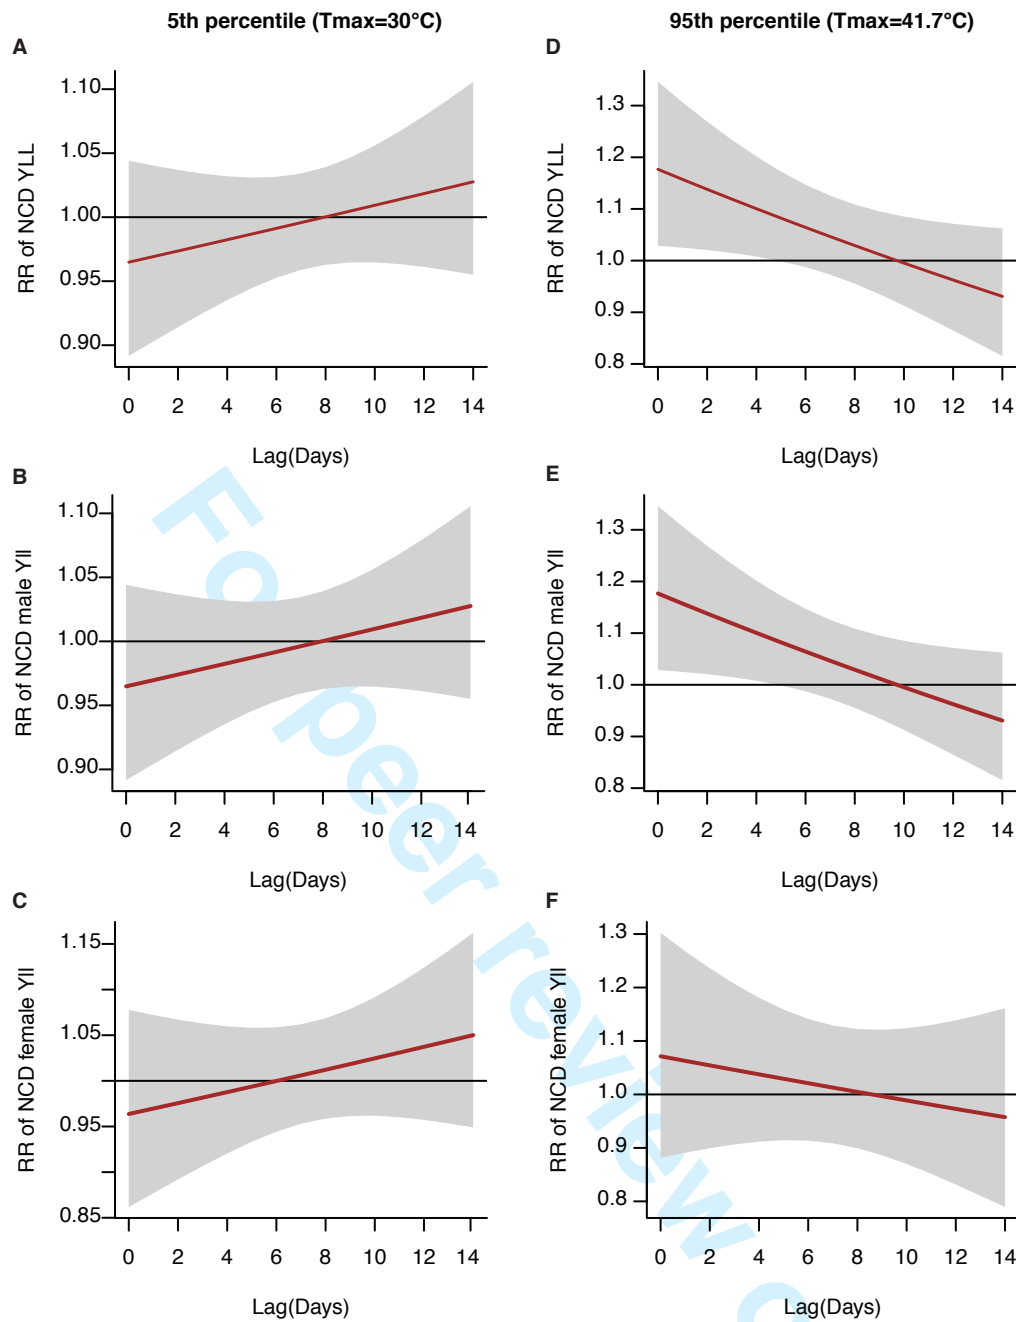

1  
2  
3  
4  
5  
6  
7  
8  
9  
10  
11  
12  
13  
14  
15  
16  
17  
18  
19  
20  
21  
22  
23  
24  
25  
26  
27  
28  
29  
30  
31  
32  
33  
34  
35  
36  
37  
38  
39  
40  
41  
42  
43  
44  
45  
46  
47  
48  
49  
50  
51  
52  
53  
54  
55  
56  
57  
58  
59  
60

**Figure 3:** Delayed effects of maximum temperature on the RR of NCD-YLL (solid line) and 95% confidence bounds (grey area) for all age, males and females in Nouna, Burkina Faso, by lag 0-14 days. Plots A-all age, B-male, and C-female represent cold effects at 30°C (5th percentile), and plots D-all age, E-male, and F-female represent heat effects at 41.7°C (95th percentile) of maximum temperature. The reference temperature is 36.4°C. Note: to improve readability of the curves, the scales on the y-axis differ.

## Supplementary File

**Excess burden of non-communicable disease years of life lost from heat in rural  
Burkina Faso: a time-series analysis of the years 2000-2010**

Aditi Bunker, Maquins Odhiambo Sewe, Ali Sie, Joacim Rocklöv, Rainer Sauerborn

**Nouna life table development with R software**

Vital statistics including the unique identifying number (ID), date of birth, date of immigration into the HDSS, date of death, date of emigration from the HDSS and gender were used to calculate age standardized death rates (ASDR) separately for males and females. The gender-specific ASDRs were used to generate mean additional survival time for each respective age band.

**Supplementary Table 1:** Male life table for the Nouna population.

| Age group | Male ASDR | Conditional probabilities of death in age interval (Initial) | Number of people having Xth birthday | Total number of deaths in age interval | Total number of person years spent in age interval | Total number of persons lived by those aged x and over | Male mean additional survival time at age X | max--- Initial | Interval |
|-----------|-----------|--------------------------------------------------------------|--------------------------------------|----------------------------------------|----------------------------------------------------|--------------------------------------------------------|---------------------------------------------|----------------|----------|
| [0-1]     | 0.05174   | 0.0493                                                       | 100000                               | 4934                                   | 95362                                              | 5801098                                                | 58.0                                        | 0.06           | 1        |
| [1-5]     | 0.02025   | 0.0773                                                       | 95066                                | 7349                                   | 362877                                             | 5705736                                                | 60.0                                        | 1.634          | 4        |
| [5-9]     | 0.00271   | 0.0135                                                       | 87717                                | 1181                                   | 435636                                             | 5342858                                                | 60.9                                        | 2.500          | 5        |
| [10-14]   | 0.00169   | 0.0084                                                       | 86537                                | 728                                    | 430865                                             | 4907223                                                | 56.7                                        | 2.500          | 5        |
| [15-19]   | 0.00213   | 0.0106                                                       | 85809                                | 908                                    | 427128                                             | 4476357                                                | 52.2                                        | 2.888          | 5        |
| [20-24]   | 0.00197   | 0.0098                                                       | 84901                                | 834                                    | 422516                                             | 4049229                                                | 47.7                                        | 2.614          | 5        |
| [25-29]   | 0.00268   | 0.0133                                                       | 84067                                | 1121                                   | 417549                                             | 3626714                                                | 43.1                                        | 2.513          | 5        |
| [30-34]   | 0.00375   | 0.0186                                                       | 82947                                | 1540                                   | 410920                                             | 3209164                                                | 38.7                                        | 2.525          | 5        |
| [35-39]   | 0.00670   | 0.0329                                                       | 81406                                | 2682                                   | 400487                                             | 2798244                                                | 34.4                                        | 2.560          | 5        |
| [40-44]   | 0.00718   | 0.0353                                                       | 78724                                | 2779                                   | 386943                                             | 2397757                                                | 30.5                                        | 2.597          | 5        |
| [45-49]   | 0.01037   | 0.0506                                                       | 75945                                | 3844                                   | 370750                                             | 2010814                                                | 26.5                                        | 2.665          | 5        |
| [50-54]   | 0.01373   | 0.0666                                                       | 72101                                | 4799                                   | 349454                                             | 1640064                                                | 22.7                                        | 2.697          | 5        |
| [55-59]   | 0.01989   | 0.0951                                                       | 67302                                | 6401                                   | 321795                                             | 1290611                                                | 19.2                                        | 2.701          | 5        |
| [60-64]   | 0.02682   | 0.1263                                                       | 60901                                | 7694                                   | 286842                                             | 968815                                                 | 15.9                                        | 2.704          | 5        |
| [65-69]   | 0.03897   | 0.1787                                                       | 53208                                | 9508                                   | 244007                                             | 681974                                                 | 12.8                                        | 2.683          | 5        |
| [70-74]   | 0.06415   | 0.2786                                                       | 43699                                | 12175                                  | 189788                                             | 437966                                                 | 10.0                                        | 2.642          | 5        |
| [75-79]   | 0.09484   | 0.3858                                                       | 31524                                | 12163                                  | 128247                                             | 248179                                                 | 7.9                                         | 2.585          | 5        |
| [80-84]   | 0.13669   | 0.5099                                                       | 19361                                | 9873                                   | 72223                                              | 119932                                                 | 6.2                                         | 2.510          | 5        |
| 85+       | 0.19889   | 1.0000                                                       | 9489                                 | 9489                                   | 47709                                              | 47709                                                  | 5.0                                         | 2.351          | 5        |

Supplementary Table 2: Female life table for the Nouna population.

| Age group | Female ASDR | Conditional probabilities of death in age interval (Initial) | Number of people having Xth birthday | Total number of deaths in age interval | Total number of person years spent in age interval | Total number of persons years lived by those aged x and over | Female mean additional survival time at age X | nax--- Initial | Interval |
|-----------|-------------|--------------------------------------------------------------|--------------------------------------|----------------------------------------|----------------------------------------------------|--------------------------------------------------------------|-----------------------------------------------|----------------|----------|
| [0-1]     | 0.04829     | 0.0462                                                       | 100000                               | 4619                                   | 95658                                              | 6151128                                                      | 61.5                                          | 0.06           | 1        |
| [1-5]     | 0.01761     | 0.0676                                                       | 95381                                | 6449                                   | 366267                                             | 6055469                                                      | 63.5                                          | 1.634          | 4        |
| [5-9]     | 0.00253     | 0.0125                                                       | 88932                                | 1116                                   | 441872                                             | 5689203                                                      | 64.0                                          | 2.500          | 5        |
| [10-14]   | 0.00154     | 0.0077                                                       | 87817                                | 672                                    | 437402                                             | 5247331                                                      | 59.8                                          | 2.500          | 5        |
| [15-19]   | 0.00231     | 0.0115                                                       | 87144                                | 1002                                   | 433606                                             | 4809928                                                      | 55.2                                          | 2.888          | 5        |
| [20-24]   | 0.00221     | 0.0110                                                       | 86143                                | 948                                    | 428451                                             | 4376323                                                      | 50.8                                          | 2.614          | 5        |
| [25-29]   | 0.00407     | 0.0201                                                       | 85194                                | 1715                                   | 421707                                             | 3947872                                                      | 46.3                                          | 2.513          | 5        |
| [30-34]   | 0.00449     | 0.0222                                                       | 83479                                | 1854                                   | 412808                                             | 3526165                                                      | 42.2                                          | 2.525          | 5        |
| [35-39]   | 0.00463     | 0.0229                                                       | 81625                                | 1868                                   | 403569                                             | 3113358                                                      | 38.1                                          | 2.560          | 5        |
| [40-44]   | 0.00555     | 0.0274                                                       | 79758                                | 2182                                   | 393543                                             | 2709789                                                      | 34.0                                          | 2.597          | 5        |
| [45-49]   | 0.00589     | 0.0291                                                       | 77575                                | 2255                                   | 382609                                             | 2316245                                                      | 29.9                                          | 2.665          | 5        |
| [50-54]   | 0.01040     | 0.0508                                                       | 75320                                | 3823                                   | 367794                                             | 1933636                                                      | 25.7                                          | 2.697          | 5        |
| [55-59]   | 0.01283     | 0.0623                                                       | 71496                                | 4454                                   | 347242                                             | 1565842                                                      | 21.9                                          | 2.701          | 5        |
| [60-64]   | 0.01747     | 0.0840                                                       | 67042                                | 5631                                   | 322284                                             | 1218600                                                      | 18.2                                          | 2.704          | 5        |
| [65-69]   | 0.03271     | 0.1520                                                       | 61412                                | 9337                                   | 285425                                             | 896316                                                       | 14.6                                          | 2.683          | 5        |
| [70-74]   | 0.05247     | 0.2335                                                       | 52075                                | 12157                                  | 231707                                             | 610891                                                       | 11.7                                          | 2.642          | 5        |
| [75-79]   | 0.08025     | 0.3361                                                       | 39918                                | 13417                                  | 167186                                             | 379184                                                       | 9.5                                           | 2.585          | 5        |
| [80-84]   | 0.10647     | 0.4208                                                       | 26500                                | 11151                                  | 104736                                             | 211998                                                       | 8.0                                           | 2.510          | 5        |
| 85+       | 0.14310     | 1.0000                                                       | 15349                                | 15349                                  | 107261                                             | 107261                                                       | 7.0                                           | 2.351          | 5        |

The mean additional survival time from the life table was matched by age and sex to calculated NCD YLL. An excerpt of the R code is given here:

```
## Calculate NCD male YLL
data$yllncd[age<1 & sex=="M" & broadgroup=="NCD"] <-58.0
data$yllncd[age>=1 & age<=5 & sex=="M" & $broadgroup=="NCD"] <-60.0
data$yllncd[age>5 & age<=10 & sex=="M" & $broadgroup=="NCD"] <-60.9
data$yllncd[age>10 & age<=15 & sex=="M" & $broadgroup=="NCD"] <-56.7
data$yllncd[age>15 & age<=20 & sex=="M" & $broadgroup=="NCD"] <-52.2
data$yllncd[age>20 & age<=25 & sex=="M" & $broadgroup=="NCD"] <-47.7
data$yllncd[age>25 & age<=30 & sex=="M" & $broadgroup=="NCD"] <-43.1
data$yllncd[age>30 & age<=35 & sex=="M" & $broadgroup=="NCD"] <-38.7
data$yllncd[age>35 & age<=40 & sex=="M" & broadgroup=="NCD"] <-34.4
data$yllncd[age>40 & age<=45 & sex=="M" & broadgroup=="NCD"] <-30.5
data$yllncd[age>45 & age<=50 & sex=="M" & broadgroup=="NCD"] <-26.5
data$yllncd[age>50 & age<=55 & sex=="M" & broadgroup=="NCD"] <-22.7
data$yllncd[age>55 & age<=60 & sex=="M" & broadgroup=="NCD"] <-19.2
data$yllncd[age>60 & age<=65 & sex=="M" & broadgroup=="NCD"] <-15.9
data$yllncd[age>65 & age<=70 & sex=="M" & broadgroup=="NCD"] <-12.8
data$yllncd[age>70 & age<=75 & sex=="M" & broadgroup=="NCD"] <-10.0
data$yllncd[age>75 & age<=80 & sex=="M" & broadgroup=="NCD"] <- 7.9
data$yllncd[age>80 & age<=85 & sex=="M" & broadgroup=="NCD"] <- 6.2
data$yllncd[age>85 & sex=="M" & broadgroup=="NCD"] <- 5.0

## Calculate NCD female YLL
data$yllncd[age< 1 & sex=="F" & broadgroup=="NCD"] <-61.5
data$yllncd[age>=1 & age<= 5 & sex=="F" & broadgroup=="NCD"] <-63.5
data$yllncd[age>=5 & age<=10 & sex=="F" & broadgroup=="NCD"] <-64.0
data$yllncd[age> 10 & age<=15 & sex=="F" & broadgroup=="NCD"] <-59.8
data$yllncd[age>15 & age<=20 & sex=="F" & broadgroup=="NCD"] <-55.2
data$yllncd[age>20 & age<=25 & sex=="F" & broadgroup=="NCD"] <-50.8
data$yllncd[age>25 & age<=30 & sex=="F" & broadgroup=="NCD"] <-46.3
data$yllncd[age>30 & age<=35 & sex=="F" & broadgroup=="NCD"] <-42.2
data$yllncd[age>35 & age<=40 & sex=="F" & broadgroup=="NCD"] <-38.1
data$yllncd[age>40 & age<=45 & sex=="F" & broadgroup=="NCD"] <-34.0
data$yllncd[age>45 & age<=50 & sex=="F" & broadgroup=="NCD"] <-29.9
data$yllncd[age>50 & age<=55 & sex=="F" & broadgroup=="NCD"] <-25.7
data$yllncd[age>55 & age<=60 & sex=="F" & broadgroup=="NCD"] <-21.9
data$yllncd[age>60 & age<=65 & sex=="F" & broadgroup=="NCD"] <-18.2
```

```

data$yllnncd[age>65 & age<=70 & sex=="F" & broadgroup=="NCD"] <-14.6
data$yllnncd[age>70 & age<=75 & sex=="F" & broadgroup=="NCD"] <-11.7
data$yllnncd[age>75 & age<=80 & sex=="F" & broadgroup=="NCD"] <- 9.5
data$yllnncd[age>80 & age<=85 & sex=="F" & broadgroup=="NCD"] <- 8.0
data$yllnncd[age>85 & sex=="F" & broadgroup=="NCD"] <- 7.0

```

### Exploratory analysis

Exploratory analysis of NCD deaths and YLL stratified by year indicates that 2010, 2008 and 2001 recorded the highest number of NCD deaths and YLL.

**Supplementary Table 3:** Breakdown of NCD deaths and YLL by year.

| Year         | All-age    |                | Male       |               | Female     |               | 65+ Years  |               |
|--------------|------------|----------------|------------|---------------|------------|---------------|------------|---------------|
|              | NCD deaths | NCD YLL        | NCD deaths | NCD YLL       | NCD deaths | NCD YLL       | NCD deaths | NCD YLL       |
| 2000         | 45         | 1180.2         | 29         | 688.9         | 16         | 491.3         | 19         | 192           |
| 2001         | 86         | 2130.1         | 49         | 1253.1        | 37         | 877           | 38         | 405.3         |
| 2002         | 51         | 1229.9         | 24         | 565.7         | 27         | 664.2         | 23         | 236.1         |
| 2003         | 67         | 1697.6         | 34         | 864.1         | 33         | 833.5         | 28         | 278.9         |
| 2004         | 57         | 1141.8         | 32         | 640.1         | 25         | 501.7         | 31         | 313.9         |
| 2005         | 71         | 1618.7         | 34         | 598.9         | 37         | 1019.8        | 29         | 280.6         |
| 2006         | 77         | 1758.6         | 41         | 897.8         | 36         | 860.8         | 40         | 413.5         |
| 2007         | 71         | 1807.6         | 42         | 1076.5        | 29         | 731.1         | 29         | 288.5         |
| 2008         | 86         | 1894.2         | 52         | 1222.9        | 34         | 671.3         | 43         | 440.3         |
| 2009         | 75         | 1632.6         | 45         | 987.7         | 30         | 644.9         | 28         | 307.2         |
| 2010         | 104        | 2275.2         | 52         | 1036.5        | 52         | 1238.7        | 48         | 455.2         |
| <b>Total</b> | <b>790</b> | <b>18366.5</b> | <b>434</b> | <b>9832.2</b> | <b>356</b> | <b>8534.3</b> | <b>356</b> | <b>3611.5</b> |

Further stratification of NCD deaths and YLL by month shows that NCD-YLL are the greatest between November and April.

**Supplementary Table 4:** Breakdown of NCD deaths and YLL by month.

| Month        | Total      |                | Male       |               | Female     |               | 65+ Years  |               |
|--------------|------------|----------------|------------|---------------|------------|---------------|------------|---------------|
|              | NCD deaths | NCD YLL        | NCD deaths | NCD YLL       | NCD deaths | NCD YLL       | NCD deaths | NCD YLL       |
| Jan          | 71         | 1606.3         | 32         | 683.1         | 39         | 923.2         | 36         | 387           |
| Feb          | 75         | 1492.5         | 42         | 855           | 33         | 637.5         | 38         | 414.5         |
| Mar          | 62         | 1157.2         | 32         | 536.9         | 30         | 620.3         | 32         | 298.4         |
| Apr          | 73         | 1420.1         | 39         | 726.1         | 34         | 694           | 42         | 408.1         |
| May          | 66         | 1619.4         | 44         | 1010.1        | 22         | 609.3         | 26         | 232.3         |
| Jun          | 69         | 1913.9         | 37         | 964.6         | 32         | 949.3         | 25         | 243.8         |
| Jul          | 58         | 1456.2         | 30         | 710.4         | 28         | 745.8         | 26         | 275.9         |
| Aug          | 59         | 1536.6         | 31         | 842.3         | 28         | 694.3         | 21         | 229.8         |
| Sep          | 65         | 1641.6         | 34         | 796.6         | 31         | 845           | 23         | 241.2         |
| Oct          | 52         | 1252.3         | 31         | 790.4         | 21         | 461.9         | 24         | 242           |
| Nov          | 59         | 1414.1         | 37         | 886           | 22         | 528.1         | 29         | 315.2         |
| Dec          | 81         | 1856.3         | 45         | 1030.7        | 36         | 825.6         | 34         | 323.3         |
| <b>Total</b> | <b>790</b> | <b>18366.5</b> | <b>434</b> | <b>9832.2</b> | <b>356</b> | <b>8534.3</b> | <b>356</b> | <b>3611.5</b> |

A heaping effect can be found on the 9<sup>th</sup> day of every month.



Supplementary Table 5: Breakdown of NCD deaths and YLL by day.

| Day          | Total      |                | Male       |               | Female     |               | 65+ Years  |               |
|--------------|------------|----------------|------------|---------------|------------|---------------|------------|---------------|
|              | NCD deaths | NCD YLL        | NCD deaths | NCD YLL       | NCD deaths | NCD YLL       | NCD deaths | NCD YLL       |
| 1            | 34         | 677.6          | 19         | 326.5         | 15         | 351.1         | 15         | 165.1         |
| 2            | 26         | 602.7          | 8          | 183.4         | 18         | 419.3         | 13         | 143.2         |
| 3            | 16         | 337            | 10         | 199.5         | 6          | 137.5         | 7          | 59.8          |
| 4            | 25         | 591.7          | 10         | 230.2         | 15         | 361.5         | 10         | 100.5         |
| 5            | 18         | 408.7          | 13         | 220.5         | 5          | 188.2         | 8          | 78.8          |
| 6            | 21         | 430.2          | 11         | 257.9         | 10         | 172.3         | 12         | 115           |
| 7            | 18         | 409.1          | 9          | 196           | 9          | 213.1         | 8          | 79.7          |
| 8            | 24         | 442.9          | 16         | 333.2         | 8          | 109.7         | 13         | 114.9         |
| 9            | 179        | 4559           | 96         | 2325.4        | 83         | 2233.6        | 77         | 763.2         |
| 10           | 26         | 471.6          | 15         | 274.2         | 11         | 197.4         | 14         | 140.7         |
| 11           | 21         | 560.2          | 7          | 120.8         | 14         | 439.4         | 10         | 99.2          |
| 12           | 19         | 408.3          | 14         | 271.9         | 5          | 136.4         | 10         | 117.2         |
| 13           | 20         | 374            | 12         | 209.2         | 8          | 164.8         | 12         | 106.9         |
| 14           | 22         | 607.5          | 12         | 387.5         | 10         | 220           | 9          | 112.4         |
| 15           | 37         | 1033.6         | 25         | 733.1         | 12         | 300.5         | 6          | 47.8          |
| 16           | 27         | 646            | 16         | 385.4         | 11         | 260.6         | 7          | 71.4          |
| 17           | 17         | 569.4          | 10         | 361.5         | 7          | 207.9         | 4          | 36            |
| 18           | 21         | 533.7          | 13         | 302.1         | 8          | 231.6         | 9          | 107.4         |
| 19           | 16         | 364.6          | 6          | 203.3         | 10         | 161.3         | 7          | 79            |
| 20           | 24         | 543.5          | 10         | 224.6         | 14         | 318.9         | 13         | 159.9         |
| 21           | 18         | 402.8          | 11         | 244.5         | 7          | 158.3         | 11         | 108.5         |
| 22           | 15         | 280.6          | 10         | 221.4         | 5          | 59.2          | 11         | 113.4         |
| 23           | 11         | 181.8          | 8          | 107.8         | 3          | 74            | 7          | 68.1          |
| 24           | 19         | 414.2          | 11         | 179.9         | 8          | 234.3         | 9          | 79            |
| 25           | 21         | 448.2          | 10         | 214.1         | 11         | 234.1         | 11         | 100.7         |
| 26           | 22         | 486.1          | 13         | 306           | 9          | 180.1         | 6          | 63.9          |
| 27           | 24         | 458.7          | 14         | 293.1         | 10         | 165.6         | 12         | 116.5         |
| 28           | 13         | 243.2          | 6          | 95.6          | 7          | 147.6         | 9          | 101.4         |
| 29           | 17         | 423.7          | 7          | 130.9         | 10         | 292.8         | 6          | 57.5          |
| 30           | 14         | 386.8          | 10         | 282.7         | 4          | 104.1         | 6          | 65.2          |
| 31           | 5          | 69.1           | 2          | 10            | 3          | 59.1          | 4          | 39.2          |
| <b>Total</b> | <b>790</b> | <b>18366.5</b> | <b>434</b> | <b>9832.2</b> | <b>356</b> | <b>8534.3</b> | <b>356</b> | <b>3611.5</b> |

The histogram of number of NCD deaths and corresponding NCD-YLL stratified by day of the month reveals a heaping effect on 9<sup>th</sup> of every month. We control for this effect in the statistical modeling.

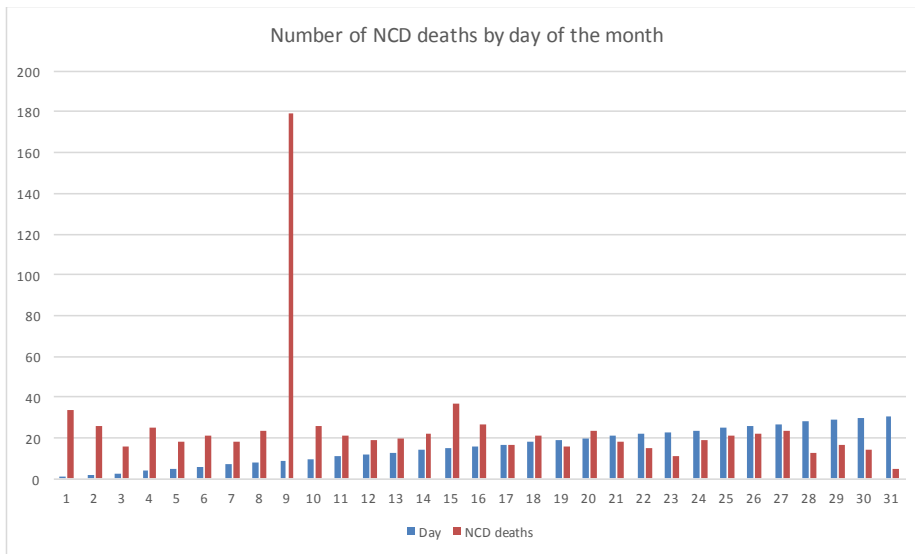

Supplementary Figure 1: Count of NCD deaths by day.

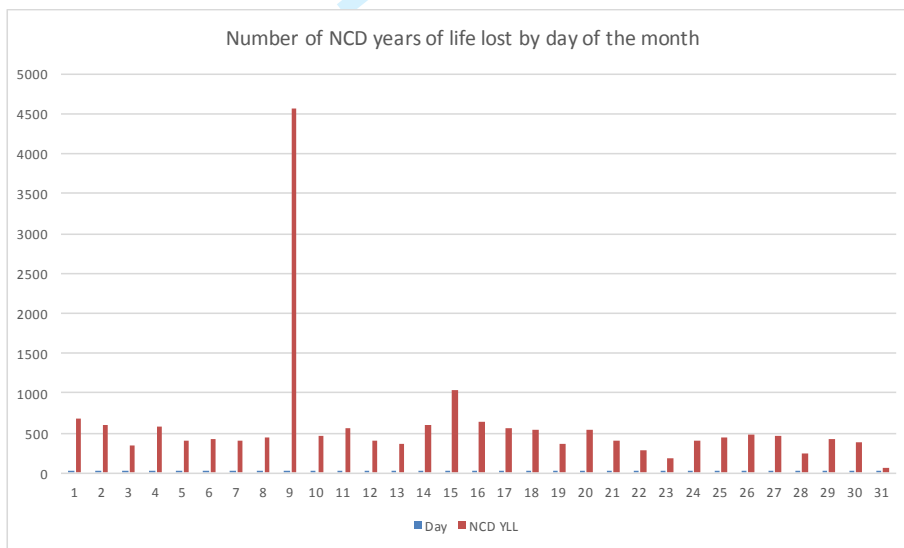

Supplementary Figure 2: Count of NCD-YLL by day.

1  
2  
3  
4  
5  
6  
7  
8  
9  
10  
11  
12  
13  
14  
15  
16  
17  
18  
19  
20  
21  
22  
23  
24  
25  
26  
27  
28  
29  
30  
31  
32  
33  
34  
35  
36  
37  
38  
39  
40  
41  
42  
43  
44  
45  
46  
47  
48  
49  
50  
51  
52  
53  
54  
55  
56  
57  
58  
59  
60

**Statistical modeling**

The histogram reveals that for most days (represented by 'Frequency' on the y axis) there were no NCD-YLL.

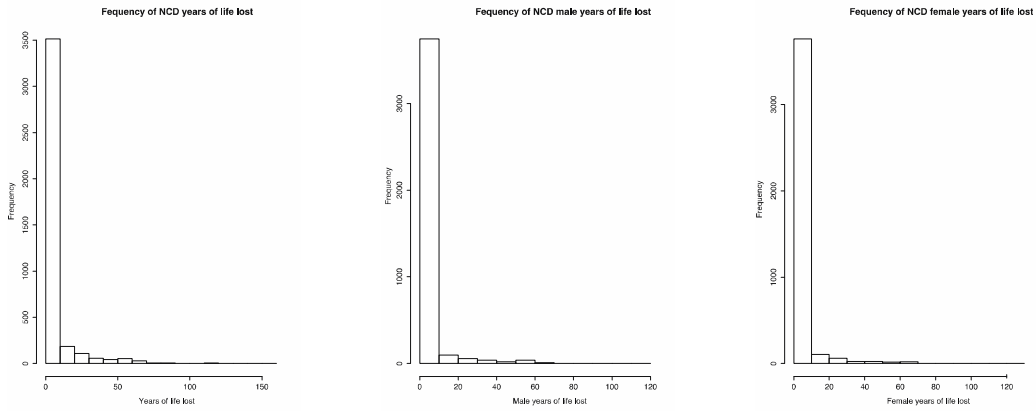

**Supplementary Figure 3:** Frequency of NCD-YLL for all-age, males and females.

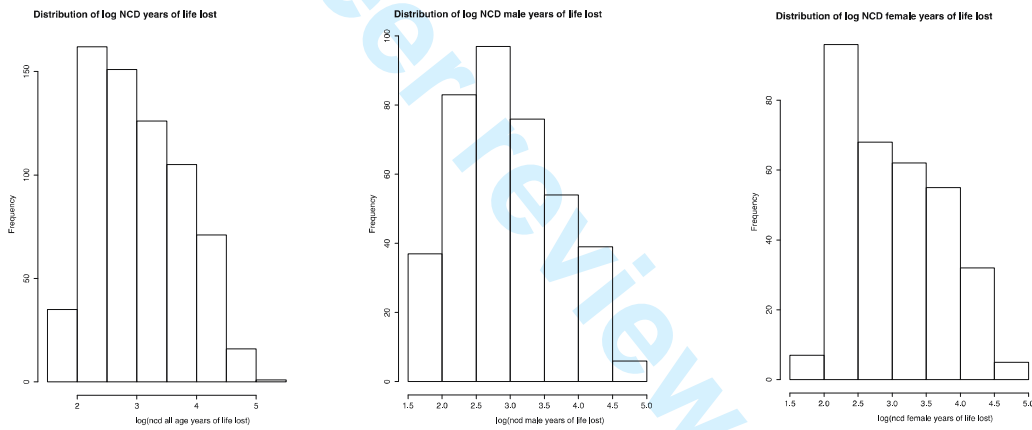

**Supplementary Figure 4:** Distribution of log NCD-YLL for all-age, males and females.

The plot of monthly maximum temperature and NCD YLL (2000-2010) shows that the peak in maximum temperature is associated with a trough in NCD YLL.

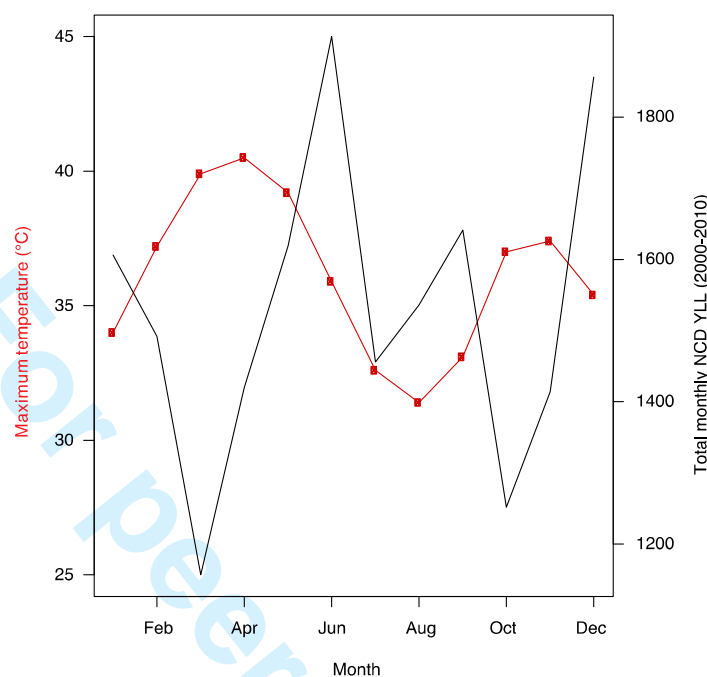

**Supplementary Figure 5:** Correlation between monthly maximum temperature and NCD mortality (2000-2010).

#### Model validation

The cumulative periodogram test assessed whether the residuals were independent over time. The black diagonal line did not cross the confidence bounds (represented by the blue dotted lines) indicating that the residuals were independent (Supplementary Figure 6). Autocorrelation is that observations close in time are more likely to be alike than those separated by time. Because the short-term (day-to-day) association of temperature and NCD-YLL are of interest, it is important to control for season and long-term trends, which can make the short-term associations difficult to detect<sup>1</sup>. The presence of vertical spikes within the confines of the confidence bounds (blue dotted lines) also indicate that autocorrelation was removed in the autocorrelation function plot (Supplementary Figure 7). There was no evidence of autocorrelation after controlling for seasonality and long-term trends in the analysis.

<sup>1</sup> Bhaskaran K, Gasparini A, Hajat S, Smeeth L, Armstrong B (2013) Time series regression studies in environmental epidemiology. *Int J Epidemiol* 42:1187–1195.

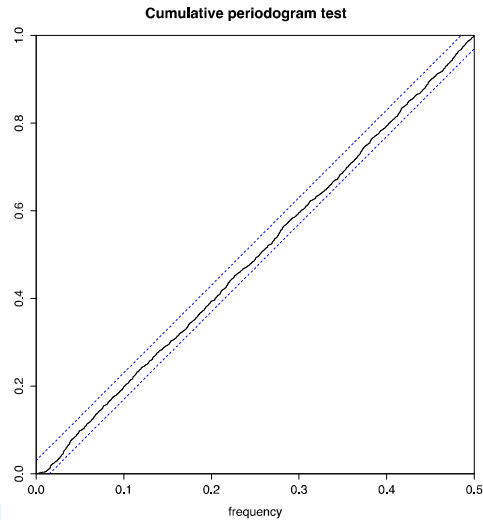

21 **Supplementary Figure 6:** Cumulative periodogram test determines the independence of residuals over  
22 time. The blue dotted lines are the confidence intervals.

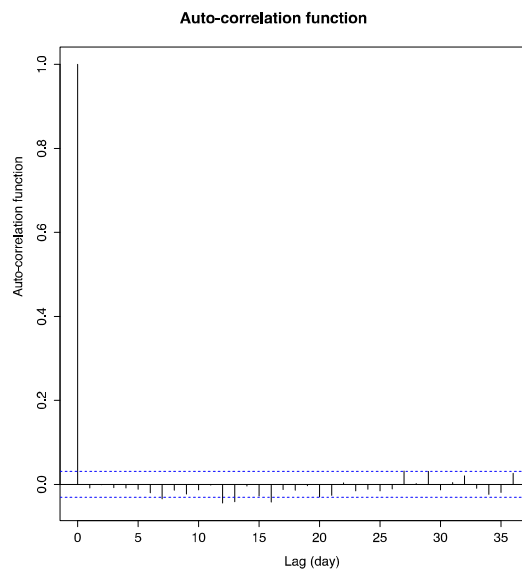

44 **Supplementary Figure 7:** Autocorrelation function of the base model. Vertical lines or 'spikes'  
45 are placed along individual lag days (x-axis). The height of the spike is relative to the magnitude of the  
46 autocorrelation function (y-axis). Autocorrelation at lag one is always one. Blue dotted lines are the  
47 confidence intervals.

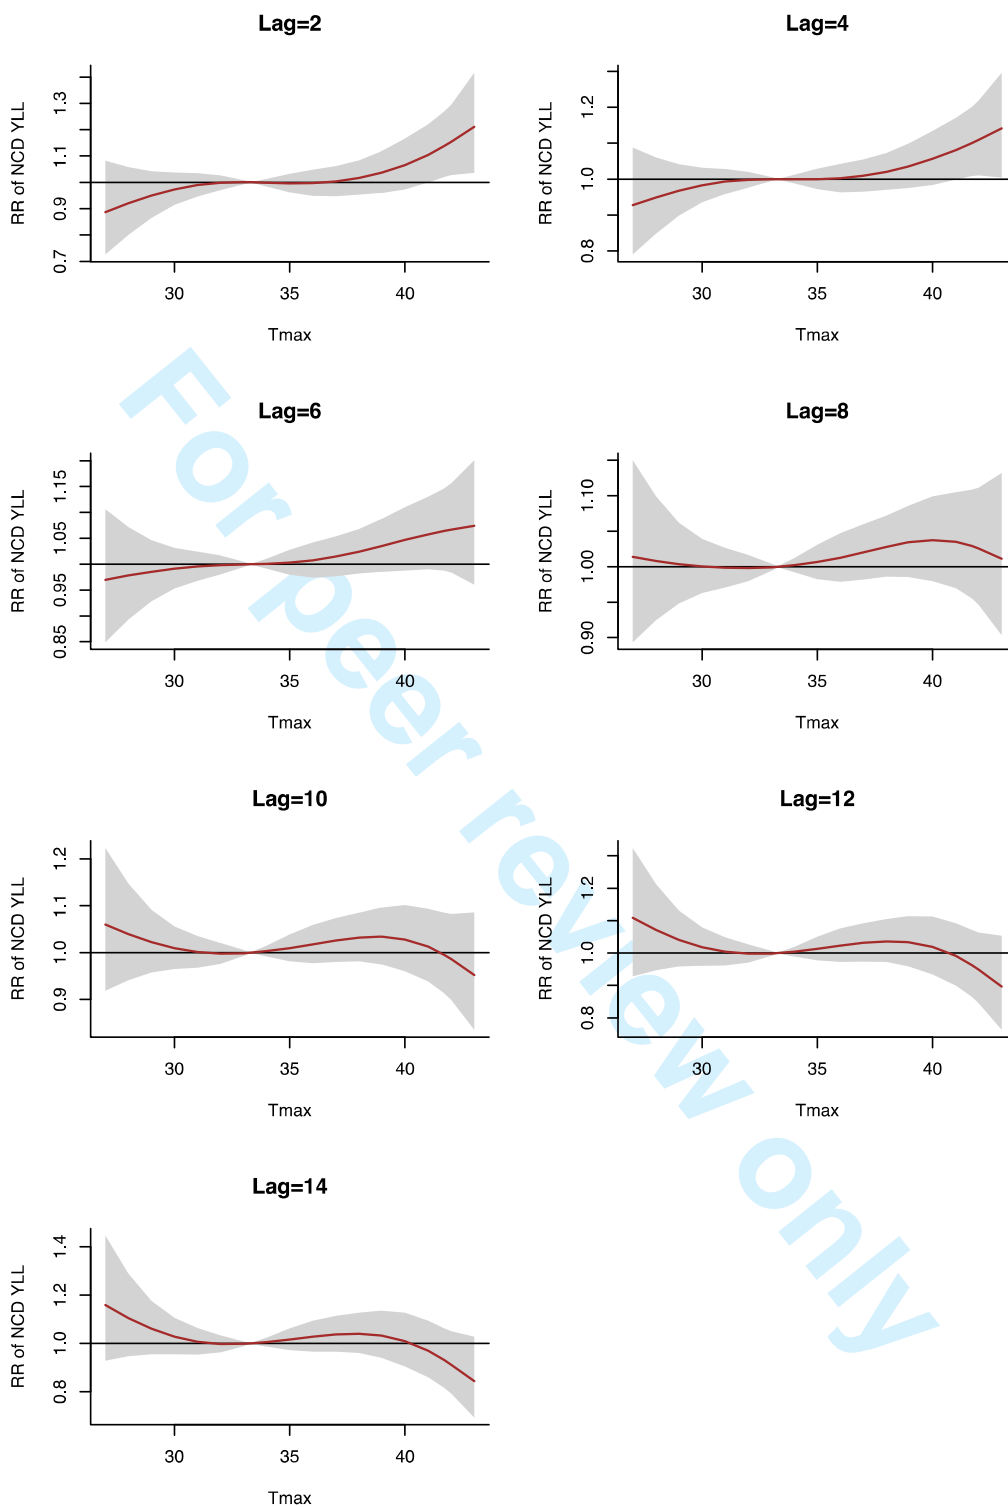

**Supplementary Figure 8:** Plots of the 4-day cumulative relative risk of non-communicable disease years of life lost for all ages stratified by lag days 2-14 (in two day increments).

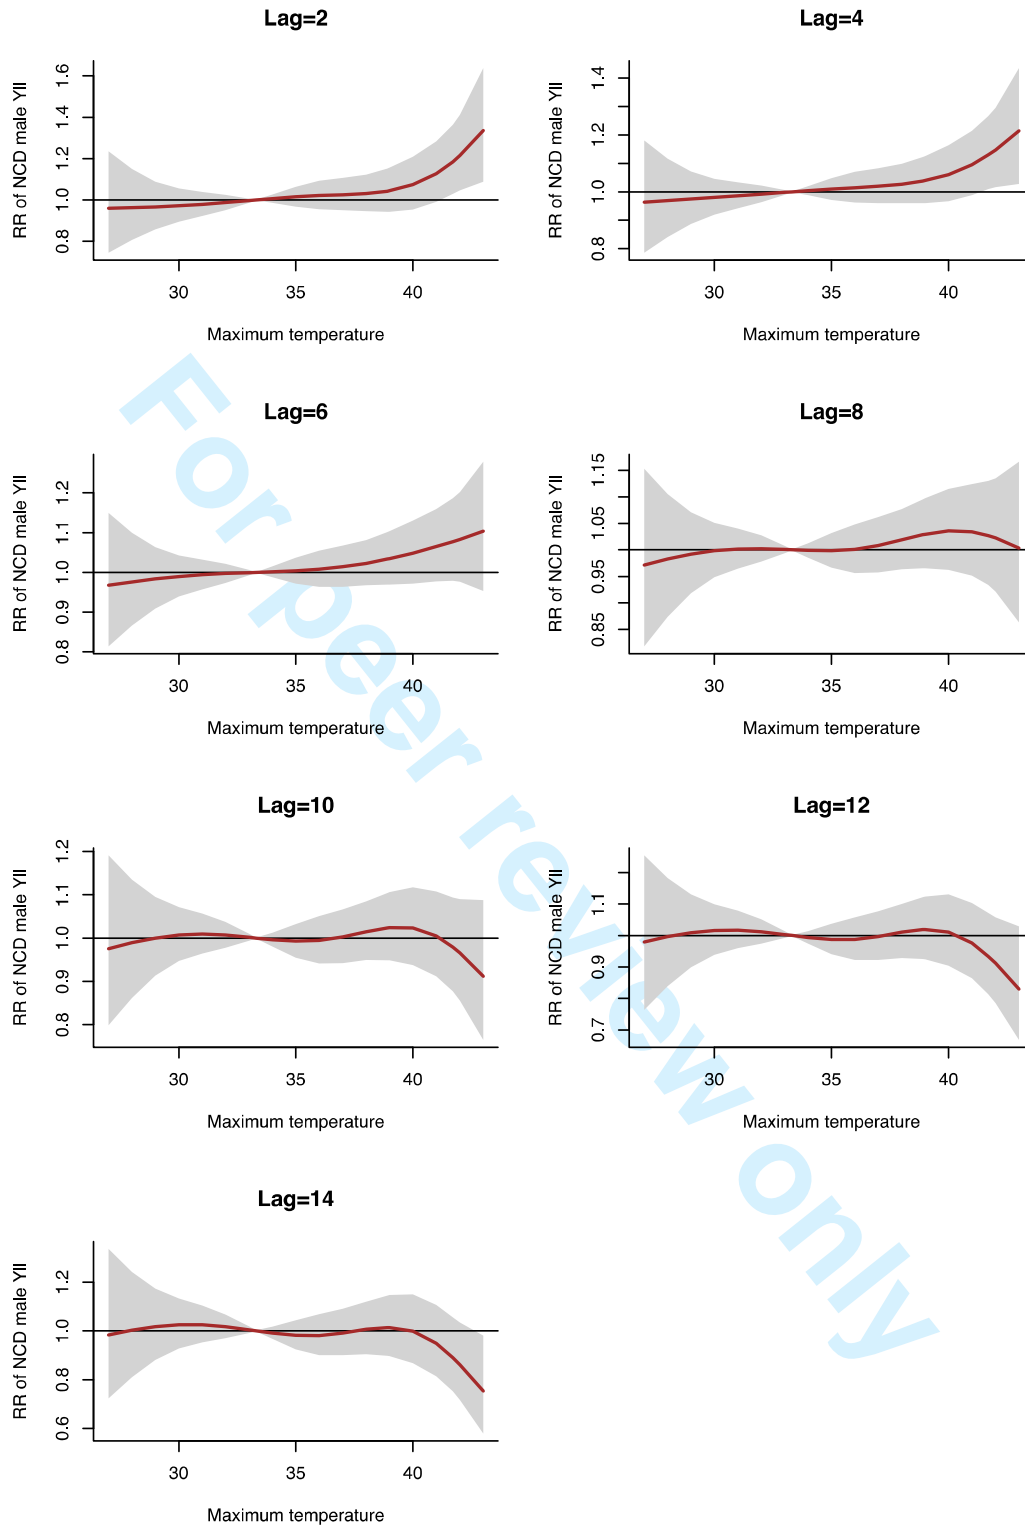

**Supplementary Figure 9:** Plots of the 4-day cumulative relative risk of non-communicable disease years of life lost for males stratified by lag days 2-14 (in two day increments).

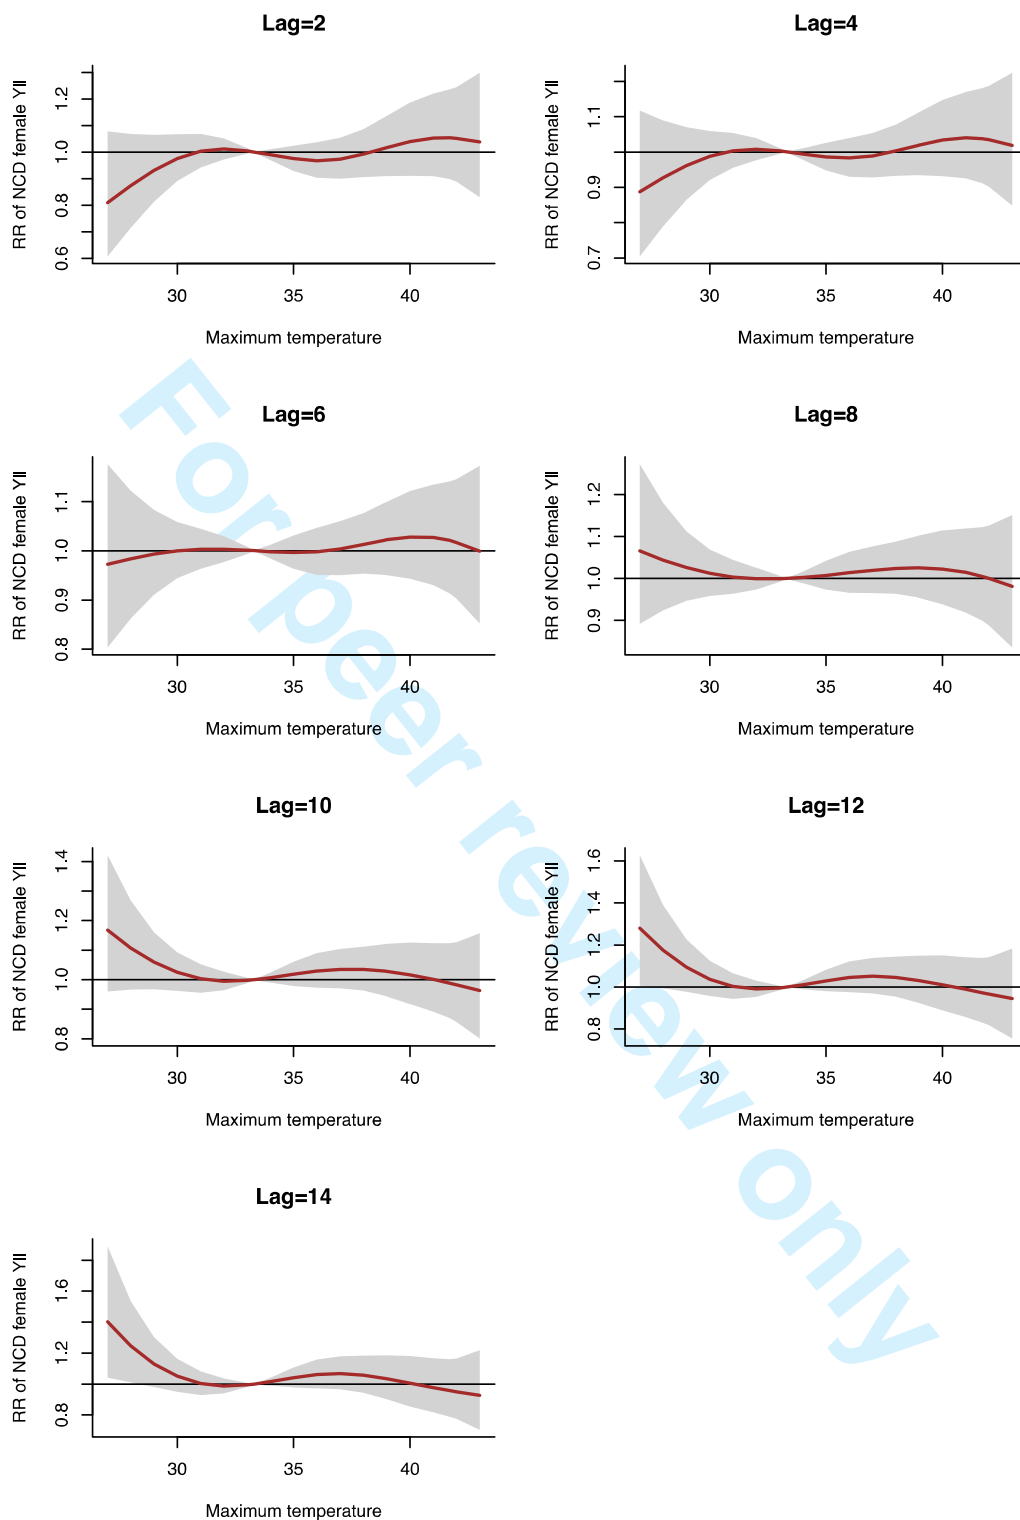

**Supplementary Figure 10:** Plots of the 4-day cumulative relative risk of non-communicable disease years of life lost for females stratified by lag days 2-14 (in two day increments).



1  
2  
3  
4  
5  
6  
7  
8  
9  
10  
11  
12  
13  
14  
15  
16  
17  
18  
19  
20  
21  
22  
23  
24  
25  
26  
27  
28  
29  
30  
31  
32  
33  
34  
35  
36  
37  
38  
39  
40  
41  
42  
43  
44  
45  
46  
47  
48  
49

**Supplementary Table 6a:** Relative risk (and 95% confidence bounds) of maximum temperature on non-communicable disease all-age years of life lost in Nouna stratified by individual lag days between 2000-2010. Relative risks are presented for; heat effects as 38.9°C, 41.1°C, 41.7°C and 42.8°C with reference to 36.4°C; cold effects as 27.8°C 30°C, 31.1°C and 33.3°C with reference to 36.4°C. Results controlled for long-term trends, season, day of the week, and heaping effect.

|              | 27.8°C<br>(1st percentile) | 30°C<br>(5th percentile) | 31.1°C<br>(10th percentile) | 33.3°C<br>(25th percentile) | 38.9°C<br>(75th percentile) | 41.4°C<br>(90th percentile) | 41.7°C<br>(95th percentile) | 42.8°C<br>(99th percentile) |
|--------------|----------------------------|--------------------------|-----------------------------|-----------------------------|-----------------------------|-----------------------------|-----------------------------|-----------------------------|
|              | 34 days below 27.8°C       | 174 days below 30°C      | 325 days below 31.3°C       | 912 days below 33.3°C       | 883 days above 38.9°C       | 300 days above 41.4°C       | 189 days above 41.7°C       | 28 days above 42.8°C        |
|              | RR (95% CI)                | RR (95% CI)              | RR (95% CI)                 | RR (95% CI)                 | RR (95% CI)                 | RR (95% CI)                 | RR (95% CI)                 | RR (95% CI)                 |
| <b>lag0</b>  | 0.88 (0.73 to 1.06)        | 0.96 (0.89 to 1.04)      | 0.99 (0.94 to 1.04)         | 1.00 (1.00 to 1.00)         | 1.03 (0.94 to 1.14)         | 1.16 (1.02 to 1.31)         | 1.18 (1.03 to 1.35)         | 1.27 (1.06 to 1.52)         |
| <b>lag1</b>  | 0.90 (0.76 to 1.06)        | 0.97 (0.90 to 1.04)      | 0.99 (0.94 to 1.04)         | 1.00 (1.00 to 1.00)         | 1.03 (0.95 to 1.13)         | 1.14 (1.01 to 1.28)         | 1.16 (1.03 to 1.31)         | 1.23 (1.05 to 1.45)         |
| <b>lag2</b>  | 0.91 (0.79 to 1.06)        | 0.97 (0.91 to 1.04)      | 0.99 (0.95 to 1.03)         | 1.00 (1.00 to 1.00)         | 1.03 (0.96 to 1.12)         | 1.12 (1.01 to 1.25)         | 1.14 (1.02 to 1.27)         | 1.20 (1.04 to 1.39)         |
| <b>lag3</b>  | 0.93 (0.81 to 1.06)        | 0.98 (0.92 to 1.03)      | 0.99 (0.96 to 1.03)         | 1.00 (1.00 to 1.00)         | 1.03 (0.97 to 1.11)         | 1.11 (1.01 to 1.22)         | 1.12 (1.01 to 1.23)         | 1.17 (1.02 to 1.33)         |
| <b>lag4</b>  | 0.94 (0.84 to 1.07)        | 0.98 (0.94 to 1.03)      | 0.99 (0.96 to 1.03)         | 1.00 (1.00 to 1.00)         | 1.03 (0.97 to 1.10)         | 1.09 (1.00 to 1.19)         | 1.10 (1.01 to 1.20)         | 1.13 (1.01 to 1.28)         |
| <b>lag5</b>  | 0.96 (0.86 to 1.07)        | 0.99 (0.94 to 1.03)      | 0.99 (0.97 to 1.03)         | 1.00 (1.00 to 1.00)         | 1.03 (0.98 to 1.09)         | 1.08 (1.00 to 1.16)         | 1.08 (1.00 to 1.17)         | 1.10 (0.99 to 1.23)         |
| <b>lag6</b>  | 0.98 (0.88 to 1.08)        | 0.99 (0.95 to 1.03)      | 1.00 (0.97 to 1.02)         | 1.00 (1.00 to 1.00)         | 1.03 (0.99 to 1.09)         | 1.06 (0.99 to 1.14)         | 1.06 (0.99 to 1.15)         | 1.07 (0.97 to 1.19)         |
| <b>lag7</b>  | 0.99 (0.90 to 1.09)        | 1.00 (0.96 to 1.03)      | 1.00 (0.97 to 1.02)         | 1.00 (1.00 to 1.00)         | 1.03 (0.99 to 1.08)         | 1.05 (0.98 to 1.12)         | 1.05 (0.97 to 1.13)         | 1.04 (0.94 to 1.16)         |
| <b>lag8</b>  | 1.01 (0.92 to 1.11)        | 1.00 (0.96 to 1.04)      | 1.00 (0.97 to 1.03)         | 1.00 (1.00 to 1.00)         | 1.03 (0.99 to 1.09)         | 1.03 (0.96 to 1.11)         | 1.03 (0.96 to 1.11)         | 1.01 (0.91 to 1.13)         |
| <b>lag9</b>  | 1.03 (0.93 to 1.13)        | 1.00 (0.96 to 1.05)      | 1.00 (0.97 to 1.03)         | 1.00 (1.00 to 1.00)         | 1.03 (0.98 to 1.09)         | 1.02 (0.94 to 1.10)         | 1.01 (0.94 to 1.10)         | 0.99 (0.88 to 1.10)         |
| <b>lag10</b> | 1.04 (0.94 to 1.16)        | 1.01 (0.96 to 1.06)      | 1.00 (0.97 to 1.03)         | 1.00 (1.00 to 1.00)         | 1.03 (0.98 to 1.10)         | 1.00 (0.92 to 1.09)         | 1.00 (0.91 to 1.09)         | 0.96 (0.85 to 1.08)         |
| <b>lag11</b> | 1.06 (0.94 to 1.19)        | 1.01 (0.96 to 1.07)      | 1.00 (0.97 to 1.04)         | 1.00 (1.00 to 1.00)         | 1.03 (0.97 to 1.10)         | 0.99 (0.90 to 1.08)         | 0.98 (0.89 to 1.08)         | 0.93 (0.82 to 1.07)         |
| <b>lag12</b> | 1.08 (0.94 to 1.23)        | 1.02 (0.96 to 1.08)      | 1.00 (0.96 to 1.05)         | 1.00 (1.00 to 1.00)         | 1.03 (0.96 to 1.11)         | 0.98 (0.88 to 1.08)         | 0.96 (0.86 to 1.07)         | 0.91 (0.78 to 1.05)         |
| <b>lag13</b> | 1.10 (0.94 to 1.27)        | 1.02 (0.96 to 1.09)      | 1.00 (0.96 to 1.05)         | 1.00 (1.00 to 1.00)         | 1.03 (0.95 to 1.12)         | 0.96 (0.86 to 1.08)         | 0.95 (0.84 to 1.07)         | 0.88 (0.75 to 1.04)         |
| <b>lag14</b> | 1.11 (0.94 to 1.32)        | 1.03 (0.96 to 1.11)      | 1.01 (0.95 to 1.06)         | 1.00 (1.00 to 1.00)         | 1.03 (0.94 to 1.13)         | 0.95 (0.84 to 1.08)         | 0.93 (0.82 to 1.06)         | 0.86 (0.71 to 1.03)         |

**Supplementary Table 6b:** Excess all-age average daily NCD-YLL (and 95% confidence bounds) in Nouna stratified by individual lag days between 2000-2010. Relative risks were used to calculate excess average daily NCD-YLL as follows: (Average daily NCD-YLL of all-age\* relative risk) – Average daily NCD-YLL. NCD-YLL are presented for; heat effects as 38.9°C, 41.1°C, 41.7°C and 42.8°C with reference to 36.4°C; cold effects as 27.8°C 30°C, 31.1°C and 33.3°C with reference to 36.4°C. Results controlled for long-term trends, season, day of the week, and heaping effect.

|       | 27.8°C<br>(1 <sup>st</sup> percentile) | 30°C<br>(5th percentile) | 31.1°C<br>(10th percentile) | 33.3°C<br>(25th percentile) | 38.9°C<br>(75th percentile) | 41.4°C<br>(90th percentile) | 41.7°C<br>(95th percentile) | 42.8°C<br>(99th percentile) |
|-------|----------------------------------------|--------------------------|-----------------------------|-----------------------------|-----------------------------|-----------------------------|-----------------------------|-----------------------------|
|       | 34 days below 27.8°C                   | 174 days below 30°C      | 325 days below 31.3°C       | 912 days below 33.3°C       | 883 days above 38.9°C       | 300 days above 41.4°C       | 189 days above 41.7°C       | 28 days above 42.8°C        |
|       | YLL (95% CI)                           | YLL (95% CI)             | YLL (95% CI)                | YLL (95% CI)                | YLL (95% CI)                | YLL (95% CI)                | YLL (95% CI)                | YLL (95% CI)                |
| lag0  | -0.53 (-1.22 to 0.30)                  | -0.16 (-0.50 to 0.20)    | -0.05 (-0.29 to 0.20)       | 0.00 (-0.01 to 0.01)        | 0.16 (-0.27 to 0.63)        | 0.71 (0.07 to 1.45)         | 0.81 (0.13 to 1.59)         | 1.24 (0.28 to 2.38)         |
| lag1  | -0.47 (-1.10 to 0.29)                  | -0.14 (-0.45 to 0.19)    | -0.05 (-0.26 to 0.18)       | 0.00 (-0.01 to 0.01)        | 0.16 (-0.23 to 0.58)        | 0.64 (0.06 to 1.29)         | 0.72 (0.12 to 1.41)         | 1.07 (0.23 to 2.07)         |
| lag2  | -0.40 (-0.98 to 0.29)                  | -0.12 (-0.40 to 0.17)    | -0.04 (-0.23 to 0.16)       | 0.00 (0.00 to 0.01)         | 0.16 (-0.19 to 0.53)        | 0.57 (0.05 to 1.13)         | 0.63 (0.09 to 1.24)         | 0.92 (0.17 to 1.79)         |
| lag3  | -0.33 (-0.86 to 0.29)                  | -0.10 (-0.35 to 0.16)    | -0.03 (-0.21 to 0.14)       | 0.00 (0.00 to 0.00)         | 0.16 (-0.15 to 0.49)        | 0.49 (0.04 to 0.99)         | 0.55 (0.07 to 1.08)         | 0.77 (0.10 to 1.52)         |
| lag4  | -0.25 (-0.75 to 0.30)                  | -0.08 (-0.30 to 0.15)    | -0.03 (-0.18 to 0.13)       | 0.00 (0.00 to 0.00)         | 0.16 (-0.12 to 0.45)        | 0.42 (0.02 to 0.86)         | 0.46 (0.04 to 0.93)         | 0.62 (0.03 to 1.28)         |
| lag5  | -0.18 (-0.63 to 0.32)                  | -0.06 (-0.25 to 0.14)    | -0.02 (-0.16 to 0.12)       | 0.00 (0.00 to 0.00)         | 0.16 (-0.09 to 0.42)        | 0.35 (-0.01 to 0.74)        | 0.38 (0.00 to 0.79)         | 0.47 (-0.05 to 1.06)        |
| lag6  | -0.11 (-0.53 to 0.36)                  | -0.04 (-0.22 to 0.14)    | -0.02 (-0.14 to 0.11)       | 0.00 (0.00 to 0.00)         | 0.16 (-0.07 to 0.39)        | 0.28 (-0.05 to 0.64)        | 0.30 (-0.06 to 0.68)        | 0.33 (-0.15 to 0.88)        |
| lag7  | -0.03 (-0.44 to 0.42)                  | -0.02 (-0.19 to 0.16)    | -0.01 (-0.13 to 0.11)       | 0.00 (0.00 to 0.00)         | 0.16 (-0.06 to 0.39)        | 0.22 (-0.1 to 0.56)         | 0.21 (-0.12 to 0.58)        | 0.20 (-0.27 to 0.72)        |
| lag8  | 0.04 (-0.37 to 0.50)                   | 0.00 (-0.17 to 0.18)     | -0.01 (-0.13 to 0.12)       | 0.00 (0.00 to 0.00)         | 0.16 (-0.07 to 0.39)        | 0.15 (-0.17 to 0.49)        | 0.13 (-0.2 to 0.50)         | 0.07 (-0.40 to 0.58)        |
| lag9  | 0.12 (-0.32 to 0.61)                   | 0.02 (-0.16 to 0.21)     | 0.00 (-0.14 to 0.13)        | 0.00 (0.00 to 0.00)         | 0.16 (-0.08 to 0.41)        | 0.08 (-0.25 to 0.44)        | 0.06 (-0.30 to 0.44)        | -0.06 (-0.54 to 0.47)       |
| lag10 | 0.20 (-0.29 to 0.74)                   | 0.04 (-0.16 to 0.26)     | 0.00 (-0.15 to 0.16)        | 0.00 (-0.01 to 0.00)        | 0.16 (-0.11 to 0.44)        | 0.02 (-0.35 to 0.41)        | -0.02 (-0.40 to 0.39)       | -0.19 (-0.69 to 0.39)       |
| lag11 | 0.28 (-0.27 to 0.89)                   | 0.06 (-0.17 to 0.31)     | 0.01 (-0.16 to 0.18)        | 0.00 (-0.01 to 0.00)        | 0.16 (-0.15 to 0.48)        | -0.05 (-0.44 to 0.38)       | -0.10 (-0.51 to 0.36)       | -0.31 (-0.85 to 0.31)       |
| lag12 | 0.36 (-0.26 to 1.07)                   | 0.08 (-0.18 to 0.36)     | 0.01 (-0.18 to 0.21)        | 0.00 (-0.01 to 0.00)        | 0.16 (-0.18 to 0.52)        | -0.11 (-0.55 to 0.37)       | -0.17 (-0.62 to 0.33)       | -0.43 (-1.01 to 0.25)       |
| lag13 | 0.44 (-0.26 to 1.25)                   | 0.11 (-0.19 to 0.42)     | 0.02 (-0.20 to 0.24)        | 0.00 (-0.01 to 0.00)        | 0.16 (-0.23 to 0.57)        | -0.17 (-0.65 to 0.36)       | -0.25 (-0.74 to 0.31)       | -0.54 (-1.16 to 0.19)       |
| lag14 | 0.53 (-0.26 to 1.45)                   | 0.13 (-0.21 to 0.49)     | 0.02 (-0.21 to 0.28)        | 0.00 (-0.01 to 0.01)        | 0.15 (-0.27 to 0.62)        | -0.24 (-0.75 to 0.35)       | -0.32 (-0.85 to 0.29)       | -0.65 (-1.31 to 0.14)       |

1  
2  
3  
4  
5  
6  
7  
8  
9  
10  
11  
12  
13  
14  
15  
16  
17  
18  
19  
20  
21  
22  
23  
24  
25  
26  
27  
28  
29  
30  
31  
32  
33  
34  
35  
36  
37  
38  
39  
40  
41  
42  
43  
44  
45  
46  
47  
48  
49

**Supplementary Table 7a:** Relative risk (and 95% confidence bounds) of maximum temperature on non-communicable disease male years of life lost in Nouna stratified by individual lag days between 2000-2010. Relative risks are presented for; heat effects as 38.9°C, 41.1°C, 41.7°C and 42.8°C with reference to 36.4°C; cold effects as 27.8°C, 30°C, 31.1°C and 33.3°C with reference to 36.4°C. Results controlled for long-term trends, season, day of the week, and heaping effect.

|       | 27.8 °C<br>(1st percentile) | 30 °C<br>(5th percentile) | 31.1 °C<br>(10th percentile) | 33.3 °C<br>(25th percentile) | 38.9 °C<br>(75th percentile) | 41.4 °C<br>(90th percentile) | 41.7 °C<br>(95th percentile) | 42.8 °C<br>(99th percentile) |
|-------|-----------------------------|---------------------------|------------------------------|------------------------------|------------------------------|------------------------------|------------------------------|------------------------------|
|       | 34 days below 27.8°C        | 174 days below 30°C       | 325 days below 31.3°C        | 912 days below 33.3°C        | 883 days above 38.9°C        | 300 days above 41.4°C        | 189 days above 41.7°C        | 28 days above 42.8°C         |
|       | RR (95% CI)                 | RR (95% CI)               | RR (95% CI)                  | RR (95% CI)                  | RR (95% CI)                  | RR (95% CI)                  | RR (95% CI)                  | RR (95% CI)                  |
| lag0  | 0.96 (0.75 to 1.21)         | 0.96 (0.87 to 1.07)       | 0.97 (0.90 to 1.04)          | 1.00 (1.00 to 1.00)          | 1.05 (0.92 to 1.19)          | 1.2 (1.02 to 1.42)           | 1.24 (1.04 to 1.48)          | 1.43 (1.13 to 1.80)          |
| lag1  | 0.96 (0.77 to 1.19)         | 0.97 (0.88 to 1.06)       | 0.98 (0.92 to 1.04)          | 1.00 (1.00 to 1.00)          | 1.04 (0.93 to 1.17)          | 1.18 (1.02 to 1.37)          | 1.21 (1.04 to 1.42)          | 1.37 (1.11 to 1.69)          |
| lag2  | 0.96 (0.79 to 1.16)         | 0.97 (0.90 to 1.05)       | 0.98 (0.93 to 1.04)          | 1.00 (1.00 to 1.00)          | 1.04 (0.94 to 1.15)          | 1.16 (1.01 to 1.33)          | 1.19 (1.03 to 1.36)          | 1.31 (1.08 to 1.58)          |
| lag3  | 0.96 (0.81 to 1.14)         | 0.98 (0.91 to 1.05)       | 0.98 (0.93 to 1.03)          | 1.00 (1.00 to 1.00)          | 1.04 (0.95 to 1.14)          | 1.14 (1.01 to 1.28)          | 1.16 (1.02 to 1.31)          | 1.25 (1.06 to 1.49)          |
| lag4  | 0.97 (0.83 to 1.13)         | 0.98 (0.92 to 1.05)       | 0.99 (0.94 to 1.03)          | 1.00 (1.00 to 1.00)          | 1.04 (0.96 to 1.12)          | 1.11 (1.00 to 1.24)          | 1.13 (1.01 to 1.27)          | 1.20 (1.03 to 1.40)          |
| lag5  | 0.97 (0.85 to 1.12)         | 0.99 (0.93 to 1.04)       | 0.99 (0.95 to 1.03)          | 1.00 (1.00 to 1.00)          | 1.04 (0.97 to 1.11)          | 1.09 (0.99 to 1.20)          | 1.10 (1.00 to 1.22)          | 1.15 (0.99 to 1.33)          |
| lag6  | 0.97 (0.86 to 1.11)         | 0.99 (0.94 to 1.04)       | 0.99 (0.96 to 1.03)          | 1.00 (1.00 to 1.00)          | 1.03 (0.97 to 1.10)          | 1.07 (0.98 to 1.17)          | 1.08 (0.98 to 1.19)          | 1.10 (0.96 to 1.26)          |
| lag7  | 0.98 (0.86 to 1.11)         | 0.99 (0.95 to 1.05)       | 1.00 (0.96 to 1.03)          | 1.00 (1.00 to 1.00)          | 1.03 (0.97 to 1.10)          | 1.05 (0.96 to 1.15)          | 1.05 (0.96 to 1.16)          | 1.05 (0.92 to 1.20)          |
| lag8  | 0.98 (0.86 to 1.11)         | 1.00 (0.95 to 1.05)       | 1.00 (0.97 to 1.04)          | 1.00 (1.00 to 1.00)          | 1.03 (0.97 to 1.10)          | 1.03 (0.94 to 1.13)          | 1.03 (0.93 to 1.13)          | 1.01 (0.88 to 1.16)          |
| lag9  | 0.98 (0.86 to 1.13)         | 1.00 (0.95 to 1.06)       | 1.01 (0.97 to 1.05)          | 1.00 (1.00 to 1.00)          | 1.03 (0.96 to 1.10)          | 1.01 (0.92 to 1.11)          | 1.00 (0.91 to 1.11)          | 0.96 (0.83 to 1.12)          |
| lag10 | 0.99 (0.85 to 1.15)         | 1.01 (0.95 to 1.07)       | 1.01 (0.97 to 1.06)          | 1.00 (1.00 to 1.00)          | 1.02 (0.95 to 1.10)          | 0.99 (0.89 to 1.10)          | 0.98 (0.88 to 1.09)          | 0.92 (0.78 to 1.09)          |
| lag11 | 0.99 (0.84 to 1.17)         | 1.01 (0.94 to 1.08)       | 1.01 (0.96 to 1.07)          | 1.00 (1.00 to 1.00)          | 1.02 (0.94 to 1.11)          | 0.97 (0.87 to 1.09)          | 0.96 (0.85 to 1.08)          | 0.88 (0.74 to 1.06)          |
| lag12 | 0.99 (0.82 to 1.20)         | 1.02 (0.94 to 1.10)       | 1.02 (0.96 to 1.08)          | 1.00 (1.00 to 1.00)          | 1.02 (0.93 to 1.12)          | 0.95 (0.84 to 1.09)          | 0.93 (0.81 to 1.07)          | 0.85 (0.69 to 1.03)          |
| lag13 | 1.00 (0.81 to 1.23)         | 1.02 (0.93 to 1.12)       | 1.02 (0.96 to 1.09)          | 1.00 (1.00 to 1.00)          | 1.02 (0.91 to 1.13)          | 0.94 (0.81 to 1.08)          | 0.91 (0.78 to 1.06)          | 0.81 (0.65 to 1.01)          |
| lag14 | 1.00 (0.79 to 1.26)         | 1.03 (0.93 to 1.13)       | 1.02 (0.95 to 1.10)          | 1.00 (1.00 to 1.00)          | 1.01 (0.90 to 1.15)          | 0.92 (0.78 to 1.08)          | 0.89 (0.75 to 1.06)          | 0.78 (0.61 to 0.99)          |

**Supplementary Table 7b:** Excess male average daily NCD-YLL (and 95% confidence bounds) in Nouna stratified by individual lag days between 2000-2010. Relative risks were used to calculate excess average daily NCD-YLL as follows: (Average daily NCD-YLL of male \* relative risk) – Average daily NCD-YLL. NCD-YLL are presented for; heat effects as 38.9°C, 41.1°C, 41.7°C and 42.8°C with reference to 36.4°C; cold effects as 27.8°C 30°C, 31.1°C and 33.3°C with reference to 36.4°C. Results controlled for long-term trends, season, day of the week, and heaping effect.

|       | 27.8 °C<br>(1st percentile) | 30 °C<br>(5th percentile) | 31.1°C<br>(10th percentile) | 33.3°C<br>(25th percentile) | 38.9°C<br>(75th percentile) | 41.4°C<br>(90 <sup>th</sup> percentile) | 41.7°C<br>(95th percentile) | 42.8°C<br>(99th percentile) |
|-------|-----------------------------|---------------------------|-----------------------------|-----------------------------|-----------------------------|-----------------------------------------|-----------------------------|-----------------------------|
|       | 34 days below 27.8°C        | 174 days below 30°C       | 325 days below 31.3°C       | 912 days below 33.3°C       | 883 days above 38.9°C       | 300 days above 41.4°C                   | 189 days above 41.7°C       | 28 days above 42.8°C        |
|       | YLL (95% CI)                | YLL (95% CI)              | YLL (95% CI)                | YLL (95% CI)                | YLL (95% CI)                | YLL (95% CI)                            | YLL (95% CI)                | YLL (95% CI)                |
| lag0  | -0.11 (-0.59 to 0.51)       | -0.09 (-0.31 to 0.16)     | -0.07 (-0.23 to 0.11)       | 0.00 (-0.01 to 0.00)        | 0.11 (-0.18 to 0.45)        | 0.49 (0.05 to 1.01)                     | 0.58 (0.11 to 1.15)         | 1.03 (0.32 to 1.93)         |
| lag1  | -0.10 (-0.54 to 0.45)       | -0.08 (-0.28 to 0.15)     | -0.06 (-0.20 to 0.10)       | 0.00 (-0.01 to 0.00)        | 0.11 (-0.16 to 0.41)        | 0.43 (0.04 to 0.89)                     | 0.51 (0.09 to 1.01)         | 0.88 (0.26 to 1.65)         |
| lag2  | -0.09 (-0.49 to 0.39)       | -0.07 (-0.25 to 0.13)     | -0.05 (-0.18 to 0.09)       | 0.00 (0.00 to 0.00)         | 0.10 (-0.14 to 0.36)        | 0.38 (0.03 to 0.78)                     | 0.44 (0.07 to 0.87)         | 0.74 (0.20 to 1.40)         |
| lag3  | -0.08 (-0.45 to 0.35)       | -0.06 (-0.22 to 0.12)     | -0.04 (-0.16 to 0.08)       | 0.00 (0.00 to 0.00)         | 0.10 (-0.11 to 0.33)        | 0.33 (0.02 to 0.68)                     | 0.38 (0.05 to 0.75)         | 0.61 (0.13 to 1.17)         |
| lag4  | -0.08 (-0.41 to 0.31)       | -0.05 (-0.19 to 0.11)     | -0.03 (-0.13 to 0.08)       | 0.00 (0.00 to 0.00)         | 0.09 (-0.10 to 0.29)        | 0.27 (0.00 to 0.58)                     | 0.31 (0.02 to 0.64)         | 0.48 (0.06 to 0.96)         |
| lag5  | -0.07 (-0.37 to 0.28)       | -0.04 (-0.17 to 0.10)     | -0.02 (-0.12 to 0.07)       | 0.00 (0.00 to 0.00)         | 0.08 (-0.08 to 0.26)        | 0.22 (-0.02 to 0.49)                    | 0.25 (-0.01 to 0.54)        | 0.36 (-0.01 to 0.78)        |
| lag6  | -0.06 (-0.34 to 0.26)       | -0.03 (-0.15 to 0.10)     | -0.01 (-0.10 to 0.08)       | 0.00 (0.00 to 0.00)         | 0.08 (-0.07 to 0.24)        | 0.17 (-0.05 to 0.42)                    | 0.19 (-0.05 to 0.45)        | 0.24 (-0.10 to 0.63)        |
| lag7  | -0.05 (-0.33 to 0.26)       | -0.01 (-0.13 to 0.11)     | 0.00 (-0.09 to 0.08)        | 0.00 (0.00 to 0.00)         | 0.07 (-0.07 to 0.23)        | 0.12 (-0.09 to 0.35)                    | 0.12 (-0.1 to 0.37)         | 0.13 (-0.19 to 0.49)        |
| lag8  | -0.05 (-0.33 to 0.27)       | 0.00 (-0.12 to 0.12)      | 0.00 (-0.08 to 0.09)        | 0.00 (0.00 to 0.00)         | 0.07 (-0.08 to 0.23)        | 0.07 (-0.14 to 0.30)                    | 0.07 (-0.16 to 0.31)        | 0.02 (-0.30 to 0.38)        |
| lag9  | -0.04 (-0.34 to 0.3)        | 0.01 (-0.12 to 0.14)      | 0.01 (-0.08 to 0.11)        | 0.00 (0.00 to 0.00)         | 0.06 (-0.10 to 0.24)        | 0.03 (-0.19 to 0.27)                    | 0.01 (-0.22 to 0.26)        | -0.08 (-0.40 to 0.29)       |
| lag10 | -0.03 (-0.36 to 0.35)       | 0.02 (-0.13 to 0.17)      | 0.02 (-0.08 to 0.13)        | 0.00 (0.00 to 0.00)         | 0.06 (-0.12 to 0.25)        | -0.02 (-0.25 to 0.24)                   | -0.05 (-0.30 to 0.23)       | -0.18 (-0.52 to 0.21)       |
| lag11 | -0.02 (-0.39 to 0.41)       | 0.03 (-0.14 to 0.20)      | 0.03 (-0.09 to 0.16)        | 0.00 (0.00 to 0.00)         | 0.05 (-0.15 to 0.27)        | -0.07 (-0.32 to 0.22)                   | -0.10 (-0.37 to 0.2)        | -0.28 (-0.63 to 0.14)       |
| lag12 | -0.02 (-0.42 to 0.47)       | 0.04 (-0.15 to 0.24)      | 0.04 (-0.09 to 0.18)        | 0.00 (0.00 to 0.00)         | 0.05 (-0.18 to 0.29)        | -0.11 (-0.39 to 0.21)                   | -0.16 (-0.45 to 0.17)       | -0.37 (-0.74 to 0.08)       |
| lag13 | -0.01 (-0.46 to 0.54)       | 0.05 (-0.16 to 0.28)      | 0.05 (-0.10 to 0.21)        | 0.00 (0.00 to 0.01)         | 0.04 (-0.21 to 0.32)        | -0.15 (-0.46 to 0.19)                   | -0.21 (-0.52 to 0.15)       | -0.46 (-0.84 to 0.03)       |
| lag14 | 0.00 (-0.50 to 0.62)        | 0.06 (-0.17 to 0.32)      | 0.06 (-0.11 to 0.24)        | 0.00 (0.00 to 0.01)         | 0.03 (-0.24 to 0.35)        | -0.20 (-0.52 to 0.19)                   | -0.26 (-0.60 to 0.13)       | -0.54 (-0.94 to -0.02)      |

1  
2  
3  
4  
5  
6  
7  
8  
9  
10  
11  
12  
13  
14  
15  
16  
17  
18  
19  
20  
21  
22  
23  
24  
25  
26  
27  
28  
29  
30  
31  
32  
33  
34  
35  
36  
37  
38  
39  
40  
41  
42  
43  
44  
45  
46  
47  
48  
49

**Supplementary Table 8a:** Relative risk (and 95% confidence bounds) of maximum temperature on non-communicable disease female years of life lost in Nouna stratified by individual lag days between 2000-2010. Relative risks are presented for; heat effects as 38.9°C, 41.1°C, 41.7°C and 42.8°C with reference to 36.4°C; cold effects as 27.8°C 30°C, 31.1°C and 33.3°C with reference to 36.4°C. Results controlled for long-term trends, season, day of the week, and heaping effect.

|              | 27.8 °C<br>(1st percentile) | 30 °C<br>(5 <sup>th</sup> percentile) | 31.1°C<br>(10th percentile) | 33.3°C<br>(25th percentile) | 38.9°C<br>(75th percentile) | 41.4°C<br>(90th percentile) | 41.7°C<br>(95th percentile) | 42.8°C<br>(99th percentile) |
|--------------|-----------------------------|---------------------------------------|-----------------------------|-----------------------------|-----------------------------|-----------------------------|-----------------------------|-----------------------------|
|              | 34 days below 27.8 °C       | 174 days below 30 °C                  | 325 days below 31.3°C       | 912 days below 33.3°C       | 883 days above 38.9°C       | 300 days above 41.4°C       | 189 days above 41.7°C       | 28 days above 42.8°C        |
|              | RR (95% CI)                 | RR (95% CI)                           | RR (95% CI)                 | RR (95% CI)                 | RR (95% CI)                 | RR (95% CI)                 | RR (95% CI)                 | RR (95% CI)                 |
| <b>lag0</b>  | 0.81 (0.62 to 1.05)         | 0.96 (0.86 to 1.08)                   | 1.01 (0.93 to 1.09)         | 1.00 (1.00 to 1.00)         | 1.01 (0.88 to 1.16)         | 1.07 (0.89 to 1.29)         | 1.07 (0.88 to 1.30)         | 1.06 (0.82 to 1.37)         |
| <b>lag1</b>  | 0.83 (0.66 to 1.06)         | 0.97 (0.88 to 1.07)                   | 1.01 (0.94 to 1.08)         | 1.00 (1.00 to 1.00)         | 1.01 (0.90 to 1.14)         | 1.06 (0.90 to 1.26)         | 1.06 (0.89 to 1.27)         | 1.05 (0.83 to 1.33)         |
| <b>lag2</b>  | 0.86 (0.69 to 1.07)         | 0.98 (0.89 to 1.07)                   | 1.01 (0.95 to 1.07)         | 1.00 (1.00 to 1.00)         | 1.01 (0.91 to 1.13)         | 1.06 (0.91 to 1.23)         | 1.05 (0.90 to 1.24)         | 1.04 (0.84 to 1.28)         |
| <b>lag3</b>  | 0.89 (0.73 to 1.08)         | 0.98 (0.91 to 1.06)                   | 1.00 (0.95 to 1.06)         | 1.00 (1.00 to 1.00)         | 1.02 (0.92 to 1.12)         | 1.05 (0.91 to 1.20)         | 1.05 (0.91 to 1.21)         | 1.03 (0.85 to 1.25)         |
| <b>lag4</b>  | 0.92 (0.77 to 1.09)         | 0.99 (0.92 to 1.06)                   | 1.00 (0.96 to 1.05)         | 1.00 (1.00 to 1.00)         | 1.02 (0.93 to 1.11)         | 1.04 (0.92 to 1.18)         | 1.04 (0.91 to 1.18)         | 1.02 (0.86 to 1.21)         |
| <b>lag5</b>  | 0.95 (0.81 to 1.11)         | 0.99 (0.93 to 1.06)                   | 1.00 (0.96 to 1.05)         | 1.00 (1.00 to 1.00)         | 1.02 (0.94 to 1.10)         | 1.03 (0.92 to 1.15)         | 1.03 (0.91 to 1.16)         | 1.01 (0.86 to 1.19)         |
| <b>lag6</b>  | 0.98 (0.85 to 1.13)         | 1.00 (0.94 to 1.06)                   | 1.00 (0.96 to 1.04)         | 1.00 (1.00 to 1.00)         | 1.02 (0.95 to 1.10)         | 1.02 (0.92 to 1.14)         | 1.02 (0.91 to 1.14)         | 1.00 (0.86 to 1.17)         |
| <b>lag7</b>  | 1.01 (0.89 to 1.16)         | 1.01 (0.95 to 1.06)                   | 1.00 (0.97 to 1.04)         | 1.00 (1.00 to 1.00)         | 1.02 (0.96 to 1.10)         | 1.02 (0.92 to 1.13)         | 1.01 (0.91 to 1.13)         | 0.99 (0.86 to 1.15)         |
| <b>lag8</b>  | 1.05 (0.92 to 1.20)         | 1.01 (0.96 to 1.07)                   | 1.00 (0.96 to 1.04)         | 1.00 (1.00 to 1.00)         | 1.03 (0.96 to 1.10)         | 1.01 (0.91 to 1.12)         | 1.00 (0.90 to 1.12)         | 0.98 (0.85 to 1.14)         |
| <b>lag9</b>  | 1.08 (0.94 to 1.24)         | 1.02 (0.96 to 1.08)                   | 1.00 (0.96 to 1.04)         | 1.00 (1.00 to 1.00)         | 1.03 (0.95 to 1.11)         | 1.00 (0.90 to 1.12)         | 1.00 (0.89 to 1.12)         | 0.98 (0.83 to 1.14)         |
| <b>lag10</b> | 1.12 (0.97 to 1.30)         | 1.02 (0.96 to 1.09)                   | 1.00 (0.96 to 1.05)         | 1.00 (1.00 to 1.00)         | 1.03 (0.95 to 1.12)         | 0.99 (0.88 to 1.12)         | 0.99 (0.87 to 1.12)         | 0.97 (0.81 to 1.15)         |
| <b>lag11</b> | 1.16 (0.98 to 1.36)         | 1.03 (0.96 to 1.11)                   | 1.00 (0.95 to 1.05)         | 1.00 (1.00 to 1.00)         | 1.03 (0.94 to 1.13)         | 0.99 (0.86 to 1.13)         | 0.98 (0.85 to 1.13)         | 0.96 (0.79 to 1.16)         |
| <b>lag12</b> | 1.19 (1.00 to 1.43)         | 1.04 (0.96 to 1.12)                   | 1.00 (0.94 to 1.06)         | 1.00 (1.00 to 1.00)         | 1.03 (0.93 to 1.15)         | 0.98 (0.84 to 1.14)         | 0.97 (0.83 to 1.14)         | 0.95 (0.77 to 1.17)         |
| <b>lag13</b> | 1.23 (1.01 to 1.51)         | 1.04 (0.95 to 1.14)                   | 1.00 (0.94 to 1.07)         | 1.00 (1.00 to 1.00)         | 1.03 (0.92 to 1.17)         | 0.97 (0.82 to 1.15)         | 0.97 (0.81 to 1.15)         | 0.94 (0.75 to 1.19)         |
| <b>lag14</b> | 1.27 (1.02 to 1.60)         | 1.05 (0.95 to 1.16)                   | 1.00 (0.93 to 1.08)         | 1.00 (1.00 to 1.00)         | 1.04 (0.91 to 1.19)         | 0.97 (0.80 to 1.16)         | 0.96 (0.79 to 1.16)         | 0.93 (0.72 to 1.20)         |

**Supplementary Table 8b:** Excess female average daily NCD-YLL (and 95% confidence bounds) in Nouna stratified by individual lag days between 2000-2010. Relative risks were used to calculate excess average daily NCD-YLL as follows: (Average daily NCD-YLL of female \* relative risk) – Average daily NCD-YLL. NCD-YLL are presented for; heat effects as 38.9°C, 41.1°C, 41.7°C and 42.8°C with reference to 36.4°C; cold effects as 27.8°C 30°C, 31.1°C and 33.3°C with reference to 36.4°C. Results controlled for long-term trends, season, day of the week, and heaping effect.

|       | 27.8 °C<br>(1st percentile) | 30 °C<br>(5th percentile) | 31.1°C<br>(10th percentile) | 33.3°C<br>(25 <sup>th</sup> percentile) | 38.9°C<br>(75th percentile) | 41.4°C (<br>90 <sup>th</sup> percentile) | 41.7°C<br>(95th percentile) | 42.8°C<br>(99th percentile) |
|-------|-----------------------------|---------------------------|-----------------------------|-----------------------------------------|-----------------------------|------------------------------------------|-----------------------------|-----------------------------|
|       | 34 days below 27.8°C        | 174 days below 30°C       | 325 days below 31.3°C       | 912 days below 33.3°C                   | 883 days above 38.9°C       | 300 days above 41.4°C                    | 189 days above 41.7°C       | 28 days above 42.8°C        |
|       | YLL (95% CI)                | YLL (95% CI)              | YLL (95% CI)                | YLL (95% CI)                            | YLL (95% CI)                | YLL (95% CI)                             | YLL (95% CI)                | YLL (95% CI)                |
| lag0  | -0.41 (-0.80 to 0.11)       | -0.08 (-0.29 to 0.16)     | 0.01 (-0.14 to 0.18)        | 0.00 (0.00 to 0.01)                     | 0.02 (-0.25 to 0.33)        | 0.15 (-0.24 to 0.61)                     | 0.15 (-0.25 to 0.63)        | 0.13 (-0.37 to 0.78)        |
| lag1  | -0.35 (-0.72 to 0.13)       | -0.06 (-0.26 to 0.15)     | 0.01 (-0.13 to 0.16)        | 0.00 (0.00 to 0.01)                     | 0.03 (-0.22 to 0.30)        | 0.13 (-0.22 to 0.55)                     | 0.13 (-0.23 to 0.56)        | 0.11 (-0.35 to 0.68)        |
| lag2  | -0.29 (-0.64 to 0.15)       | -0.05 (-0.23 to 0.14)     | 0.01 (-0.11 to 0.14)        | 0.00 (0.00 to 0.00)                     | 0.03 (-0.19 to 0.28)        | 0.12 (-0.2 to 0.48)                      | 0.11 (-0.21 to 0.50)        | 0.09 (-0.33 to 0.60)        |
| lag3  | -0.23 (-0.56 to 0.17)       | -0.04 (-0.20 to 0.13)     | 0.01 (-0.10 to 0.13)        | 0.00 (0.00 to 0.00)                     | 0.03 (-0.16 to 0.25)        | 0.10 (-0.18 to 0.42)                     | 0.10 (-0.20 to 0.43)        | 0.07 (-0.31 to 0.52)        |
| lag4  | -0.17 (-0.48 to 0.20)       | -0.03 (-0.17 to 0.13)     | 0.01 (-0.09 to 0.11)        | 0.00 (0.00 to 0.00)                     | 0.04 (-0.14 to 0.23)        | 0.08 (-0.17 to 0.37)                     | 0.08 (-0.19 to 0.38)        | 0.05 (-0.29 to 0.45)        |
| lag5  | -0.10 (-0.39 to 0.23)       | -0.01 (-0.14 to 0.12)     | 0.01 (-0.08 to 0.10)        | 0.00 (0.00 to 0.00)                     | 0.04 (-0.12 to 0.21)        | 0.07 (-0.16 to 0.33)                     | 0.06 (-0.18 to 0.33)        | 0.03 (-0.28 to 0.39)        |
| lag6  | -0.04 (-0.31 to 0.28)       | 0.00 (-0.12 to 0.12)      | 0.01 (-0.07 to 0.09)        | 0.00 (0.00 to 0.00)                     | 0.05 (-0.10 to 0.20)        | 0.05 (-0.16 to 0.29)                     | 0.04 (-0.18 to 0.30)        | 0.01 (-0.29 to 0.35)        |
| lag7  | 0.03 (-0.24 to 0.34)        | 0.01 (-0.10 to 0.13)      | 0.01 (-0.07 to 0.09)        | 0.00 (0.00 to 0.00)                     | 0.05 (-0.09 to 0.20)        | 0.04 (-0.17 to 0.27)                     | 0.03 (-0.19 to 0.27)        | -0.01 (-0.30 to 0.32)       |
| lag8  | 0.10 (-0.17 to 0.41)        | 0.03 (-0.09 to 0.14)      | 0.01 (-0.07 to 0.09)        | 0.00 (0.00 to 0.00)                     | 0.05 (-0.09 to 0.21)        | 0.02 (-0.19 to 0.25)                     | 0.01 (-0.21 to 0.26)        | -0.03 (-0.32 to 0.30)       |
| lag9  | 0.17 (-0.12 to 0.51)        | 0.04 (-0.08 to 0.17)      | 0.00 (-0.08 to 0.09)        | 0.00 (0.00 to 0.00)                     | 0.06 (-0.10 to 0.23)        | 0.00 (-0.22 to 0.25)                     | -0.01 (-0.24 to 0.25)       | -0.05 (-0.35 to 0.30)       |
| lag10 | 0.25 (-0.07 to 0.62)        | 0.05 (-0.08 to 0.19)      | 0.00 (-0.09 to 0.10)        | 0.00 (0.00 to 0.00)                     | 0.06 (-0.11 to 0.25)        | -0.01 (-0.25 to 0.26)                    | -0.02 (-0.27 to 0.26)       | -0.07 (-0.39 to 0.31)       |
| lag11 | 0.33 (-0.04 to 0.75)        | 0.07 (-0.08 to 0.22)      | 0.00 (-0.10 to 0.11)        | 0.00 (0.00 to 0.00)                     | 0.06 (-0.13 to 0.28)        | -0.03 (-0.29 to 0.27)                    | -0.04 (-0.31 to 0.27)       | -0.09 (-0.44 to 0.33)       |
| lag12 | 0.41 (-0.01 to 0.90)        | 0.08 (-0.09 to 0.26)      | 0.00 (-0.12 to 0.13)        | 0.00 (0.00 to 0.00)                     | 0.07 (-0.15 to 0.31)        | -0.04 (-0.33 to 0.29)                    | -0.06 (-0.35 to 0.29)       | -0.11 (-0.48 to 0.36)       |
| lag13 | 0.49 (0.02 to 1.07)         | 0.09 (-0.10 to 0.30)      | 0.00 (-0.13 to 0.14)        | 0.00 (-0.01 to 0.00)                    | 0.07 (-0.17 to 0.35)        | -0.06 (-0.37 to 0.31)                    | -0.07 (-0.40 to 0.31)       | -0.13 (-0.54 to 0.39)       |
| lag14 | 0.58 (0.04 to 1.25)         | 0.11 (-0.11 to 0.34)      | 0.00 (-0.15 to 0.16)        | 0.00 (-0.01 to 0.00)                    | 0.08 (-0.20 to 0.39)        | -0.07 (-0.42 to 0.34)                    | -0.09 (-0.44 to 0.34)       | -0.14 (-0.59 to 0.43)       |

Effect estimates withstood changes to model parameters.

**Supplementary Table 9:** Cumulative relative risk (and 95% confidence bounds) of maximum temperature on NCD years of life lost in Nouna between 2000-2010 at 41.7°C with reference to 36.4°C stratified by variations in model parameters. Results controlled for long-term trends, season, day of the week, and heating effect. df=degrees of freedom.

|                                                                       | Lag structure     | RR (95% CI)         |
|-----------------------------------------------------------------------|-------------------|---------------------|
| <b>Knots for exposure-response: 10th, 50th, and 90th (Base model)</b> | 4 day cumulative  | 2.08 (1.08 to 4.01) |
| <b>Knots for exposure-response: 10th, 75th, and 90th</b>              | 4 day cumulative  | 2.10 (1.07 to 4.13) |
| <b>Knots for exposure-response: 10th, 25th, 75th and 90th</b>         | 4 day cumulative  | 2.11 (1.07 to 4.15) |
| <b>Cubic B-spline for exposure-response</b>                           | 4 day cumulative  | 2.11 (0.96 to 4.66) |
| <b>Df for exposure-response:3df, and lag-response: 3df</b>            | 4 day cumulative  | 2.14 (1.10 to 4.15) |
| <b>Df for lag-response: 5</b>                                         | 4 day cumulative  | 1.98 (1.02 to 3.87) |
| <b>Df/year for seasonal control: 5</b>                                | 4 day cumulative  | 1.47 (0.82 to 2.64) |
| <b>Df/year for seasonal control: 6</b>                                | 4 day cumulative  | 1.61 (0.87 to 3.01) |
| <b>Df/year for seasonal control: 7</b>                                | 4 day cumulative  | 2.00 (1.06 to 3.80) |
| <b>Df/year for seasonal control: 10</b>                               | 4 day cumulative  | 2.14 (1.09 to 4.22) |
| <b>Log YLL with gaussian family</b>                                   | 4 day cumulative  | 1.82 (0.96 to 3.45) |
| <b>Extending lag period: 14 days lag</b>                              | 14 day cumulative | 1.98 (0.66 to 5.91) |
| <b>Extending lag period: 28 days lag</b>                              | 28 day cumulative | 0.67 (0.11 to 4.24) |

The model applying a natural cubic spline with knots placed at the 10<sup>th</sup>, 50<sup>th</sup> and 90<sup>th</sup> percentile for the exposure-response relationship, and 2 degrees of freedom with equal knot placement for the lag-response relationship along a logarithmic scale presented the lowest Quasi Akaike Information Criterion (QAIC). This was therefore selected as the final model.

**Supplementary Table 10:** Quasi Akaike Information Criterion (QAIC) values used for selecting the optimal model. NS=natural cubic spline, BS=cubic B-spline, tmax=maximum temperature, df=degrees of freedom.

| Model                                                                                       | QAIC    |
|---------------------------------------------------------------------------------------------|---------|
| NS knots placed at 10, 50, 90th percentile for tmax, 2df lag                                | 4320.82 |
| NS knots placed at 10, 50, 90th percentile for tmax, 3df lag                                | 4324.96 |
| NS knots placed at 10, 50, 90th percentile for tmax, 5df lag                                | 4333.91 |
| NS knots placed at 10, 25, 75, 90th percentile for tmax, 2df lag                            | 4323.75 |
| NS knots placed at 10, 75, 90th percentile for tmax, 2df lag                                | 4320.91 |
| NS equal knots for exposure-response, 2df tmax, 2df lag                                     | 4326.68 |
| NS equal knots for exposure-response, 4df tmax, 2df lag                                     | 4331.27 |
| NS equal knots for exposure-response, 3df tmax, 2df lag                                     | 4328.83 |
| NS equal knots for exposure-response, 3df tmax, 3df lag                                     | 4332.39 |
| BS knots placed at 10, 50, 90th percentile for tmax, 4df for lag (2df for lag were too few) | 4340.54 |

STROBE Statement—Checklist of items that should be included in reports of *cohort studies*

|                              | Item No | Recommendation                                                                                                                                                                                                                                                                                                                                                   |
|------------------------------|---------|------------------------------------------------------------------------------------------------------------------------------------------------------------------------------------------------------------------------------------------------------------------------------------------------------------------------------------------------------------------|
| <b>Title and abstract</b>    | 1       | (a) Indicate the study's design with a commonly used term in the title or the abstract [within title page and abstract under 'design']<br>(b) Provide in the abstract an informative and balanced summary of what was done and what was found [see abstract under 'results']                                                                                     |
| <b>Introduction</b>          |         |                                                                                                                                                                                                                                                                                                                                                                  |
| Background/rationale         | 2       | Explain the scientific background and rationale for the investigation being reported [pg 4]                                                                                                                                                                                                                                                                      |
| Objectives                   | 3       | State specific objectives, including any prespecified hypotheses [pg 5]                                                                                                                                                                                                                                                                                          |
| <b>Methods</b>               |         |                                                                                                                                                                                                                                                                                                                                                                  |
| Study design                 | 4       | Present key elements of study design early in the paper [pg 5-8]                                                                                                                                                                                                                                                                                                 |
| Setting                      | 5       | Describe the setting, locations, and relevant dates, including periods of recruitment, exposure, follow-up, and data collection [pg 5-7]                                                                                                                                                                                                                         |
| Participants                 | 6       | (a) Give the eligibility criteria, and the sources and methods of selection of participants. Describe methods of follow-up [pg 5-7]<br>(b) For matched studies, give matching criteria and number of exposed and unexposed [n/a]                                                                                                                                 |
| Variables                    | 7       | Clearly define all outcomes, exposures, predictors, potential confounders, and effect modifiers. Give diagnostic criteria, if applicable [pg 5-8]                                                                                                                                                                                                                |
| Data sources/<br>measurement | 8*      | For each variable of interest, give sources of data and details of methods of assessment (measurement). Describe comparability of assessment methods if there is more than one group [pg 5-8]                                                                                                                                                                    |
| Bias                         | 9       | Describe any efforts to address potential sources of bias [n/a]                                                                                                                                                                                                                                                                                                  |
| Study size                   | 10      | Explain how the study size was arrived at [n/a]                                                                                                                                                                                                                                                                                                                  |
| Quantitative variables       | 11      | Explain how quantitative variables were handled in the analyses. If applicable, describe which groupings were chosen and why [pg 8-9]                                                                                                                                                                                                                            |
| Statistical methods          | 12      | (a) Describe all statistical methods, including those used to control for confounding [for all statistical methods a-e: pg 7-9]<br>(b) Describe any methods used to examine subgroups and interactions<br>(c) Explain how missing data were addressed<br>(d) If applicable, explain how loss to follow-up was addressed<br>(e) Describe any sensitivity analyses |
| <b>Results</b>               |         |                                                                                                                                                                                                                                                                                                                                                                  |
| Participants                 | 13*     | (a) Report numbers of individuals at each stage of study—eg numbers potentially eligible, examined for eligibility, confirmed eligible, included in the study, completing follow-up, and analysed [n/a]<br>(b) Give reasons for non-participation at each stage<br>(c) Consider use of a flow diagram                                                            |
| Descriptive data             | 14*     | (a) Give characteristics of study participants (eg demographic, clinical, social) and information on exposures and potential confounders [for all descriptive data a-c: pg 9, Table 2]<br>(b) Indicate number of participants with missing data for each variable of interest<br>(c) Summarise follow-up time (eg, average and total amount)                     |
| Outcome data                 | 15*     | Report numbers of outcome events or summary measures over time [pg 9-11, Table 1,2]                                                                                                                                                                                                                                                                              |
| Main results                 | 16      | (a) Give unadjusted estimates and, if applicable, confounder-adjusted estimates and                                                                                                                                                                                                                                                                              |



|                          |    |                                                                                                                                                                                           |
|--------------------------|----|-------------------------------------------------------------------------------------------------------------------------------------------------------------------------------------------|
|                          |    | their precision (eg, 95% confidence interval). Make clear which confounders were adjusted for and why they were included [all main results <i>a-c</i> : pg 9-11, Tables 3-4, Figures 1-3] |
|                          |    | (b) Report category boundaries when continuous variables were categorized                                                                                                                 |
|                          |    | (c) If relevant, consider translating estimates of relative risk into absolute risk for a meaningful time period                                                                          |
| Other analyses           | 17 | Report other analyses done—eg analyses of subgroups and interactions, and sensitivity analyses [pg 11]                                                                                    |
| <b>Discussion</b>        |    |                                                                                                                                                                                           |
| Key results              | 18 | Summarise key results with reference to study objectives [pg 11]                                                                                                                          |
| Limitations              | 19 | Discuss limitations of the study, taking into account sources of potential bias or imprecision. Discuss both direction and magnitude of any potential bias [pg 14]                        |
| Interpretation           | 20 | Give a cautious overall interpretation of results considering objectives, limitations, multiplicity of analyses, results from similar studies, and other relevant evidence [pg 11-13]     |
| Generalisability         | 21 | Discuss the generalisability (external validity) of the study results [pg 14]                                                                                                             |
| <b>Other information</b> |    |                                                                                                                                                                                           |
| Funding                  | 22 | Give the source of funding and the role of the funders for the present study and, if applicable, for the original study on which the present article is based [pg 15]                     |

\*Give information separately for exposed and unexposed groups.

**Note:** An Explanation and Elaboration article discusses each checklist item and gives methodological background and published examples of transparent reporting. The STROBE checklist is best used in conjunction with this article (freely available on the Web sites of PLoS Medicine at <http://www.plosmedicine.org/>, Annals of Internal Medicine at <http://www.annals.org/>, and Epidemiology at <http://www.epidem.com/>). Information on the STROBE Initiative is available at <http://www.strobe-statement.org>.

# BMJ Open

## Excess burden of non-communicable disease years of life lost from heat in rural Burkina Faso: a time-series analysis of the years 2000-2010

|                                 |                                                                                                                                                                                                                                                                                                                           |
|---------------------------------|---------------------------------------------------------------------------------------------------------------------------------------------------------------------------------------------------------------------------------------------------------------------------------------------------------------------------|
| Journal:                        | <i>BMJ Open</i>                                                                                                                                                                                                                                                                                                           |
| Manuscript ID                   | bmjopen-2017-018068.R1                                                                                                                                                                                                                                                                                                    |
| Article Type:                   | Research                                                                                                                                                                                                                                                                                                                  |
| Date Submitted by the Author:   | 15-Sep-2017                                                                                                                                                                                                                                                                                                               |
| Complete List of Authors:       | Bunker, A.; Heidelberg University, Network Aging Research<br>Sewe, Maquins ; Umeå University<br>Sie, Ali; Centre de Recherche en Sante de Nouna<br>Rocklov, Joachim; Umea Universitet Nationalekonomi,<br>Sauerborn, Rainer; Institute of Public Health, University of Heidelberg,<br>Tropical Medecine and Public Health |
| <b>Primary Subject Heading</b>: | Epidemiology                                                                                                                                                                                                                                                                                                              |
| Secondary Subject Heading:      | Global health, Public health                                                                                                                                                                                                                                                                                              |
| Keywords:                       | Heat, Year of life lost, Non-communicable disease, Sub-Saharan Africa, Time-series                                                                                                                                                                                                                                        |
|                                 |                                                                                                                                                                                                                                                                                                                           |

SCHOLARONE™  
Manuscripts

1  
2  
3 **Excess burden of non-communicable disease years of life lost from heat in rural**  
4 **Burkina Faso: a time-series analysis of the years 2000-2010**  
5  
6

7  
8 Aditi Bunker<sup>1,2</sup>, Maquins Odhiambo Sewe<sup>3</sup>, Ali Sie<sup>4</sup>, Joacim Rocklöv<sup>3</sup>, Rainer  
9 Sauerborn<sup>2</sup>  
10

11  
12 <sup>1</sup>*Network Aging Research, University of Heidelberg, Bergheimer Strasse 20, D-69115*  
13 *Heidelberg, Germany*  
14

15  
16 <sup>2</sup>*Institute of Public Health, University of Heidelberg, Im Neuenheimer Feld 324,*  
17 *69120 Heidelberg, Germany*  
18

19  
20 <sup>3</sup>*Department of Public Health and Clinical Medicine, Epidemiology and Global*  
21 *Health, Umeå University, 901 87, Umeå, Sweden*  
22

23  
24 <sup>4</sup>*Centre de Recherche en Santé de Nouna, Burkina Faso, PO BOX 02 Nouna, Burkina*  
25 *Faso*  
26  
27

28  
29  
30  
31 **Corresponding author**  
32

33 Aditi Bunker

34 Network Aging Research

35 University of Heidelberg

36 Bergheimer Strasse 20

37 D-69115 Heidelberg

38 Germany

39 E-mail: [aditi.bunker@uni-heidelberg.de](mailto:aditi.bunker@uni-heidelberg.de)

40 Phone: +41-762800186  
41  
42  
43  
44  
45  
46  
47  
48  
49  
50  
51  
52  
53  
54  
55  
56  
57  
58  
59  
60

## Abstract

### Objectives

Investigate the association of heat exposure on years of life lost (YLL) from non-communicable diseases (NCD) in Nouna, Burkina Faso between 2000-2010.

### Design

Daily time-series regression analysis using distributed lag non-linear models, assuming a quasi-Poisson distribution of YLL.

### Setting

Nouna Health and Demographic Surveillance System, Kossi Province, Rural Burkina Faso.

### Participants

18,367 NCD-YLL corresponding to 790 NCD deaths recorded in the Nouna HDSS register over 11 years.

### Main outcome measure

Excess mean daily NCD-YLL were generated from the relative risk of maximum daily temperature on NCD-YLL, including effects delayed up to 14 days.

### Results

Daily average NCD-YLL were 4.6, 2.4 and 2.1 person-years for all-ages, males and females, respectively. Moderate 4-day cumulative rise in maximum temperature from 36.4°C (50<sup>th</sup> percentile) to 41.4°C (90<sup>th</sup> percentile) resulted in 4.44 (95% CI 0.24 to 12.28) excess daily NCD-YLL for all-ages, rising to 7.39 (0.32 to 24.62) at extreme temperature (42.8°C; 99<sup>th</sup> percentile). The strongest health effects manifested on the day of heat exposure (lag 0), where 0.81 (0.13 to 1.59) excess mean NCD-YLL occurred daily at 41.7°C compared to 36.4°C, diminishing in statistical significance after 4 days. At lag 0, daily excess mean NCD-YLL were higher for males 0.58 (0.11 to 1.15) compared to females 0.15 (-0.25 to 0.63) at 41.7°C versus 36.4°C.

### Conclusion

Premature death from NCD was elevated significantly with moderate and extreme heat exposure. These findings have important implications for developing adaptation and mitigation strategies to reduce ambient heat exposure and preventive measures for limiting NCD in Africa.

**Key words:** temperature, heat, years of life lost, non-communicable disease, Africa, time-series.

### Strengths and limitations of this study

- This study investigated the relationship between two defining public health issues affecting Sub-Saharan Africa; increasing ambient heat from climate change and the rising prevalence of non-communicable disease
- Eleven years of high-quality health and demographic data from rural Africa was exploited for analysis
- Only premature death was quantified as the outcome because long-term morbidity data were unavailable
- Temperature data from a weather station located 53 km from the study location was used as a proxy for individual level temperature exposure.

## Introduction

As the global average temperature rises, epidemiological evidence on the temperature-health association in neglected African populations is needed to develop appropriate interventions. Surface temperature over West Africa and the Sahel increased by 0.5-0.8°C between 1970 and 2010, and at a faster pace in the most recent 20 years [1]. Analysis of longitudinal data from 12 Health and Demographic Surveillance Sites (HDSS), which includes the Nouna HDSS in Burkina Faso, forecasts that the mean temperature in Africa will exceed the 1900-2000 decadal average by 2100 under all climate change scenarios [2]. In a study applying six climate model-future scenarios across six HDSS sites, the most conservative combination, rapid economic growth and balanced energy sources resulted in a 0.5-1°C temperature increase by 2100, whereas most combinations projected a 2-3°C temperature rise in the same period [2]. Prolonged exposure to high ambient temperature in the subsistence farming community of Nouna, and low adaptive capacity makes this community particularly vulnerable to the effects of temperature increase.

Non-communicable disease (NCD) cause substantial economic drain to society by adversely affecting four pillars of economic growth; labour supply, productivity, investments and education. Projections from 2006 indicated that if no action was taken to reduce the risk of NCD in 23 low-and-middle income countries, US\$83 billion would be lost over the subsequent decade to the impact of heart disease, stroke and diabetes [3]. As life expectancy increases in Burkina Faso, people will have more time to develop chronic and degenerative disorders; NCD will therefore contribute increasingly to population mortality. In 2014, NCD accounted for 32% of all deaths in Burkina Faso. The main contributors were cardiovascular disease, cancer, chronic respiratory disease and diabetes [4]. In 2011, Friel *et al.* presented a review exposing the link between climate change and a wide range of NCD, and argued that more frequent and intense heat extremes could exacerbate cardiovascular and respiratory health outcomes [5].

Previous studies have explored the impact of extreme events such as heatwaves or cold waves [6,7] on health, which are anticipated to increase in frequency and magnitude with climate change [8]. A recent multicity study, however, found that

1  
2  
3 milder non-optimal temperature rather than extreme temperature was responsible for  
4 most of the temperature-related mortality burden (defined as below the 2.5<sup>th</sup> and  
5 above the 97.5<sup>th</sup> percentile) [9]. Unfortunately, no African studies were included by  
6 Gasparri *et al.* [9]. Heat (and cold) waves are defined by magnitude and duration;  
7 for example, two or more consecutive days exceeding the 98-99<sup>th</sup> (or 1-2<sup>nd</sup>) percentile  
8 of the temperature range. Excess risks are a comparison of heatwave periods with  
9 non-heatwaves periods in previous years. Our study investigates the health risks of  
10 moderate to extreme heat, where extreme temperature is defined as below the 5<sup>th</sup> and  
11 above the 95<sup>th</sup> percentiles of maximum temperature.  
12  
13  
14  
15  
16  
17  
18  
19

20 Epidemiological studies on the temperature-health association in African populations  
21 have primarily measured daily deaths as the outcome [10,11]. Rather than the number  
22 of deaths, we used years of life lost (YLL), a global burden of disease (GBD)  
23 outcome metric for ascertaining premature death. YLL is an aggregate of life  
24 expectancy and death counts that gives the absolute value of years of life lost from a  
25 certain exposure, rather than a relative risk. In the only previous study set in Africa  
26 investigating the temperature-YLL association, Egondi *et al.* found no heat effects on  
27 *all-cause* YLL in the East African highlands of Nairobi, Kenya. A reduction in  
28 temperature (21°C compared with 26°C), however, resulted in 27.4 excess all-cause  
29 YLL per day (95% CI 2.7 to 52.0) [12]. The current article addresses Africa's dual  
30 challenge of coping with rising temperatures from climate change and increasing  
31 prevalence of NCD. The association between temperature and other health outcomes  
32 in Nouna, including infectious disease will be the subject of future work. The paucity  
33 of population-based studies set in African focused on the impact of temperature on  
34 NCD health outcomes suggests further studies are required. Our study addresses this  
35 research gap by investigating the impact of 11 years of heat exposure on YLL from  
36 NCD in the Nouna HDSS.  
37  
38  
39  
40  
41  
42  
43  
44  
45  
46  
47  
48

## 49 **Methods**

### 50 ***Data collection***

51 Health outcome data were obtained from the HDSS, Centre de Recherche en Santé de  
52 Nouna, Burkina Faso [13]. All registered deaths between 1 January 2000 to 31  
53 December 2010 were included. Vital statistics for each resident included a unique  
54 identifying number (ID), date of birth, date of immigration into the HDSS, date of  
55  
56  
57  
58  
59  
60

1  
2  
3 death, date of emigration from the HDSS and gender. Raw mortality data comprised a  
4 unique ID number for each death event, date of birth, date of death, sex, cause of  
5 death coded as an International Classification of Disease (ICD10) code, and an  
6 accompanying cause of death in French. Cause of death was established by verbal  
7 autopsy [14]. Age of death was calculated as the difference between the date of death  
8 and birth. We applied the GBD cause-specific categories and ICD10 codes to define  
9 NCD as an aggregate of: malignant neoplasms (C00-C97), other neoplasms (D00-  
10 D48), diabetes mellitus (E10-E14), endocrine disorders (D55-D64; minus-D64.9,  
11 D65-D89, E03-E07, E15-16, E20-E34, E65-E88), neuropsychiatric conditions (F01-  
12 F99, G06-G98), sense organ diseases (H00-H61, H68-H93), cardiovascular diseases  
13 (I00-I99), respiratory diseases (J30-J98), digestive diseases (K00-K92), genitourinary  
14 diseases (N00-N64, N75-N98), skin diseases (L00-L98), musculoskeletal diseases  
15 (M00-M99) and congenital anomalies (Q00-Q99) [15].  
16  
17  
18  
19  
20  
21  
22  
23  
24  
25

### 26 ***Computation of daily years of life lost***

27  
28 Different resolutions of life tables can be used to calculate YLL i.e. global, country-  
29 level or local life expectancy depending on the purpose of the study. In 1990, the  
30 GBD approach calculated YLL relative to the life expectancy of Japanese men and  
31 women, the highest for any societal group [16]. Weights for age and time preference  
32 can additionally be applied to reduce the contribution of death before adulthood [17].  
33 For the GBD 2010 study, a reference standard of 86 years at birth was used for both  
34 males and females and YLL were calculated using a life table based on the lowest  
35 observed mortality in each age group in countries with more than five million  
36 inhabitants [18]. This study used local rather than global life tables, as done in similar  
37 studies [19-21] to present realistic potential losses or gains in life years for the Nouna  
38 population grounded in real data (rather than modelled data), which is more  
39 meaningful for local decision makers. The cause of death and demographic data from  
40 the Nouna HDSS were used to build life tables for the Nouna population. The use of  
41 global life expectancy would likely produce very large YLL for populations with low  
42 life expectancy such as in Burkina Faso. Furthermore, global life expectancy is likely  
43 to be more useful when comparing YLL between two countries, which was not the  
44 aim of this study.  
45  
46  
47  
48  
49  
50  
51  
52  
53  
54  
55  
56  
57  
58  
59  
60



We used the Nouna HDSS vital events and mortality data from 2000-2010 to produce age-specific death rates. We generated gender-specific life tables to account for varying life expectancies between men and women (details in **Supplementary File**). Mean additional survival time, averaged between 2000-2010 was calculated for each age band to account for the changing population profile over this time. Abridged life tables were created in five-year increments, producing stable life expectancy estimates for a relatively small population (approximately 90,000 inhabitants in 2012 [10]). The 0-1, and 1-5 age groups were, however, separated. Combining these ages would mask the lower remaining life expectancy for the 0-1 age relative to the 1-5 age group, a consequence of high infant mortality. For each NCD death, YLL were calculated by matching age and sex with the relevant life table. Daily YLL were an aggregate of individual YLL on the respective day calculated as:

a) individual YLL at time of death:

$$YLL_{individual(i)} = LE_{remaining} - Age_{death} \quad [1]$$

b) total daily YLL:

$$YLL_{daily} = \sum_{i=1}^n YLL_i \quad [2]$$

where:

$i$  is the  $i$ th individual

$LE_{remaining}$  is the conditional life expectancy

$Age_{death}$  is the age at death

$n$  is the number of deaths occurring on a given day.

We stratified NCD-YLL by sex to assess if gender differences existed.

### **Temperature data**

Because temperature data for Nouna were not sufficiently complete for analysis, we obtained hourly mean (t-mean), maximum (t-max) and minimum (t-min) temperature data from the National Climatic Data Centre for the Dédougou weather station (12.4° N, 3.4° W) from 1 January 2000 to 31 December 2010 (4071 days). Pearson's

correlation analysis was performed to compare maximum temperature between a local Nouna weather station (coordinates 12.7° N, 3.9° W) and the Dédougou weather station (located 53 km from Nouna). Over the study period of 4071 days, 2432 days (59%) of maximum temperature from Nouna were available for comparison. The very strong correlation coefficient of 0.93 (95% CI 0.92 to 0.94), p-value < 2.2e-16 indicated there was little variability between the two sites, validating our use of Dédougou maximum temperature for Nouna. Hourly Dédougou data were averaged to give a daily temperature. The raw time-series consisted of 25% missing t-mean, 14% t-max and 17% t-min. We created an imputation algorithm by averaging 15 consecutive days of temperature either side of a missing temperature value to create a 30-day moving average. The Time Indexes and Time Indexed Series (tis) package v.1.30 was applied in R software to impute missing temperature values.

### ***Statistical modelling***

We applied time-series quasi-Poisson regression analysis, using a distributed lag non-linear model (DLNM) to investigate the association between maximum daily temperature and NCD-YLL.

A natural cubic spline with eight degrees of freedom per year was applied to control for season and long-term time-trends. A heaping effect was found in the raw data (**Supplementary Table 5 and Supplementary Figure 1-2**), where deaths of an unknown date were assigned to the 9<sup>th</sup> day of the corresponding month. An indicator variable was added to mark and control for heaping of deaths and day of the week. The DLNM captured the immediate and delayed effects of temperature (lags) on health, known as the lag-response association as single lag days, or as it cumulates over time. The exposure-response curve was modelled with a natural cubic spline with knots placed at the 10<sup>th</sup>, 50<sup>th</sup> and 90<sup>th</sup> percentiles. The lag-response was modelled with a natural cubic spline of two degrees of freedom, resulting in default knot placement equally along a logarithmic scale. The model equation was:

$$E(Y_t) = \beta_o + s(T, \text{timedf}) + f(X_{tmax}, \text{lagdf}, \text{vardf}) + DOW + HP$$

$$E(Y_t) \sim \text{quasi - Poisson}$$

[3]

where:

1  
2  
3  $E(Y_t)$  is the daily YLL

4  $\beta_o$  is the y intercept

5  
6  $s(T, timedf)$  is the smooth function of time with specified df *timedf*

7  
8  $f(X_{tmax}, lagdf, vardf)$  is the cross-basis function of t-max and the associated lag  
9 dimension with *vardf* and *lagdf* degrees of freedom respectively. DOW accounts for  
10 day of week and HP for the heaping effect.  
11  
12

13  
14  
15 From the RR, absolute values of excess mean daily NCD-YLL were calculated as:

$$16 \quad (Average \text{ daily } NCD - YLL \times RR) - Average \text{ daily } NCD - YLL$$

17  
18  
19  
20  
21  
22  
23  
24  
25  
26  
27  
28  
29  
30  
31  
32  
33  
34  
35  
36  
37  
38  
39  
40  
41  
42  
43  
44  
45  
46  
47  
48  
49  
50  
51  
52  
53  
54  
55  
56  
57  
58  
59  
60

[4]

All effect estimates were presented against the median t-max of 36.4°C either as overall 4-day and 14-day cumulative RRs (and corresponding excess mean daily NCD-YLL), or single-day lags extending to 14 days.

Several sensitivity analyses were conducted to test the robustness of altering model choices including; specifying alternative knot positions for exposure-response at the 10<sup>th</sup>, 75<sup>th</sup> and 90<sup>th</sup>, and 10<sup>th</sup>, 25<sup>th</sup>, 75<sup>th</sup> and 90<sup>th</sup> percentiles, extending degrees of freedom (df) for the lag-response between 2 to 6df, manipulating control for season and time-trend ranging between 5-10df, logarithm transformation of YLL and applying a Gaussian distribution, and extending the lag period to 28 days to assess if temperature exposure triggered NCD deaths on a longer time scale. Quasi-Akaike information criteria (QAIC) values were calculated to guide model selection. All statistical analyses were conducted using *R* software v.3.2.2. Distributed lag non-linear models were fitted using the DLNM package v.2.2.3.

## Results

The 790 NCD deaths correspond to 18,367 YLL over the study period. Cardiovascular diseases were the largest contributor to NCD-YLL, accounting for 9095 or 50% of all NCD-YLL. Digestive disorders, malignant neoplasms, genitourinary and neuropsychiatric conditions also contributed substantially towards NCD-YLL. Interestingly, endocrine disorders (including diabetes mellitus) formed a very small proportion (1%) of all NCD-YLL (**Table 1**). **Table 2** shows that maximum mortality peaked at five deaths per day, corresponding to 154 daily NCD-YLL. Daily

1  
2  
3 mean NCD-YLL were 4.6, 2.4 and 2.1 person-years for all-ages, males and females,  
4 respectively. Maximum daily temperature was 36.4°C at the 50<sup>th</sup> percentile, peaking  
5 at 43.9°C in the study period.  
6  
7

8  
9  
10 **Figure 1** shows 3D graphs of the RR of NCD-YLL at a range of maximum  
11 temperature and lag values, centred at the reference temperature of 36.4°C (all RRs  
12 and excess mean daily NCD-YLL in the results are given as a comparison to this  
13 reference temperature). All-age (panel A) and male (panel B) plots showed a strong  
14 surge in the RR with high temperature close to the time of heat exposure. Males  
15 presented no noticeable effect with colder temperature. In contrast, women (panel C)  
16 and the all-age group showed more prominent health effects with cooler temperatures,  
17 which increased at longer lags. The lag structure of 0-4 days was used to identify  
18 immediate health effects [22], which were expanded to 14 days to verify if the effects  
19 persisted or were concentrated in earlier days. Single day lagged effects from 0-14  
20 days were also considered to identify mortality displacement trends with longer lags.  
21 The main results were the 4- and 14-day cumulative (**Table 3a and Figure 2**) and  
22 single-day lagged RR of NCD-YLL (**Table 4a and Figure 3**), from which daily  
23 excess mean NCD-YLL was calculated (**Tables 3b and 4b**).  
24  
25  
26  
27  
28  
29  
30  
31  
32  
33

34 Heat effects on NCD-YLL were felt strongly in Nouna above the 50<sup>th</sup> percentile. Over  
35 four cumulative days, exposure to moderate temperature (90<sup>th</sup> percentile at 41.3°C)  
36 was associated with a statistically significant increase of excess mean daily NCD-  
37 YLL by 4.44 (0.24 to 12.28) for all-ages, 3.73 (0.33 to 11.39) for males, but remained  
38 statistically insignificant for females 0.43 (-1.08 to 4.16). In comparison to the 90<sup>th</sup>  
39 percentile, excess mean daily NCD-YLL increased slightly at 95<sup>th</sup> percentile (41.7°C)  
40 for all ages and males, but not females (**Table 3b**). Extreme heat exposure (99<sup>th</sup>  
41 percentile) over four days increased excess daily mean NCD-YLL for all-ages to 7.39  
42 (0.32 to 24.62) and 8.65 (1.07 to 32.73) for males in contrast to the minimal increase  
43 for females; 0.12 (-1.48 to 5.86). Extending the cumulative effect to 14 days also  
44 resulted in elevated excess daily mean NCD-YLL, but wider 95% confidence bounds  
45 rendered the effect estimates for all three groups statistically insignificant.  
46  
47  
48  
49  
50  
51  
52  
53  
54

55  
56 Across 14 individual lag days (**Figure 3**), the largest heat effects were felt  
57 immediately (at lag 0); excess daily mean NCD-YLL were 0.81 (0.13 to 1.59) for all-  
58  
59  
60

1  
2  
3 ages, 0.58 (0.11 to 1.15) for males, and 0.15 (-0.25 to 0.63) for females at 41.7°C  
4 (Table 4b). Heat effects tapered after lag 0, but remained statistically significant to  
5 lag 4 at 41.7°C for all-ages and males. For the 95<sup>th</sup> percentile, a gradual reduction in  
6 excess daily mean NCD-YLL (statistically insignificant) was observed up to 8-10 lag  
7 days for all-ages, males and females with no subsequent increase.  
8  
9

10  
11  
12  
13 A reduction in temperature to 30°C (Figure 3), resulted in a slightly protective effect  
14 at shorter lags (0-5), but after 14 days the excess daily NCD-YLL were slightly  
15 elevated for all subgroup; 0.13 (-0.21 to 0.49) for all-ages; 0.06 (-0.17 to 0.32) for  
16 males; and 0.11 (-0.11 to 0.34) for females (Table 4b). Females were the only group  
17 to present a statistically significant increase in mean daily NCD-YLL with extreme  
18 cold (1<sup>st</sup> percentile) at lag 13 and 14 (Supplementary Table 8b).  
19  
20  
21  
22  
23

24 Excess mean daily NCD-YLL were elevated with heat exposure for the 65+ age  
25 group, however, the low sample size produced very large confidence bounds (i.e. 0.14  
26 (-0.89 to 86.35) at 38.9°C versus 36.4°C.  
27  
28  
29  
30

31 Several sensitivity analyses were conducted to validate model selection, including  
32 generating QAIC, where lower QAIC indicate better model fit (Supplementary  
33 Tables 9 and 10). Because increasing the df produces lower QAIC values, we used  
34 prior examples to achieve a balance in controlling for season and long-term trend to 8  
35 df per year [9]. Applying 7 df per year, as used in other studies did not greatly affect  
36 the risk estimates [21,23]. The natural cubic spline produced lower QAIC in  
37 comparison to the more flexible cubic B-spline. Varying knot position and numbers  
38 for the exposure-response relationship also did not vary effect estimates. Using 3 df  
39 for the lag-response relationship produced the classic reversed J curve expected for  
40 heat effects, however, 2 df generated lower QAICs indicating better model fit. There  
41 was no evidence of autocorrelation (Supplementary Figures 6-7).  
42  
43  
44  
45  
46  
47  
48  
49  
50

## 51 Discussion

52 A central finding of this study was that excess premature deaths from NCD increased  
53 with moderate and extreme heat in rural Sub Saharan Africa. The magnitude of health  
54 effects worsened with heat intensity. The largest increase in excess premature  
55 mortality from NCD occurred rapidly, on the day of heat exposure (lag 0), and  
56  
57  
58  
59  
60

1  
2  
3 diminished in statistical significance after 4 days. The effects of heat on NCD-YLL  
4 were greater in males in comparison to females.  
5  
6

7  
8 In Nairobi, Kenya, increase in temperature over 14 days from 26°C to 30°C resulted  
9 in 3.3 (95% CI -19.7 to 26.4) YLL per day, but from *all causes* [12]. Similarly, a  
10 change in temperature from the 50<sup>th</sup> to 75<sup>th</sup> percentile (36.4 to 38.9°C) in Nouna  
11 resulted in 3.01 (-0.84 to 10.82) excess daily *NCD-YLL* over 14 days. Unlike Nouna,  
12 the temperature in Nairobi does not typically exceed 40°C. As the only existing  
13 African study presenting outcomes as YLL, the comparison presented here indicated  
14 ~3 daily YLL in Nouna and Nairobi with a similar temperature increase.  
15 Unfortunately, a direct contrast of results between these two African studies is limited  
16 because YLL in Nouna were from NCD only, but from all causes of death in Nairobi.  
17  
18  
19  
20  
21  
22  
23

24 In Australia and China heat exposure increased the YLL from cardiovascular disease.  
25 A total of 45 years were lost daily from cardiovascular disease (95% CI 22 to 67  
26 years) in Brisbane, Australia, at a mean temperature of 32°C versus 24°C [19]. In  
27 Guangzhou, China (lag 0-14), a change in mean temperature from the 75<sup>th</sup> (28°C) to  
28 99<sup>th</sup> percentile (32°C) resulted in 4.81 (-2.25 to 11.88) daily YLL from cardiovascular  
29 disease [21]. Cardiovascular disease contributed to 50% of YLL in Nouna. Although  
30 subgroup analysis of NCD was limited by sample size in Nouna, the magnitude of  
31 effects was closer to Guangzhou than Brisbane; 4.07 (-2.73 to 35.66) and 7.39 (0.32  
32 to 24.62) mean daily YLLs were found from *all NCD* at lag 0-14 and lag 0-4  
33 respectively at the 50<sup>th</sup> versus 99<sup>th</sup> percentile. Heat can exacerbate cardiovascular  
34 strain, through increased cardiac output, blood viscosity and coagulation, attenuated  
35 vasoconstriction, and cerebral perfusion pressure [24]. Our findings agree with those  
36 from Guangzhou and Brisbane [19,21], where heat effects occurred rapidly at lag 0,  
37 lasting a maximum of 4 days. In contrast to Brisbane, Nouna and Guangzhou  
38 exhibited fewer YLL for a similar age and temperature shift. All sites used regional or  
39 local life tables to calculate YLL rather than global life tables, so the elevated YLL in  
40 Brisbane are unlikely to be attributable to lower life expectancy in Nouna compared  
41 to Brisbane. Unlike Brisbane, the predominant cause of death in Nouna is still  
42 infectious disease; most days in the Nouna time series exhibited no YLL from NCD.  
43 Temperature-related premature death from NCD could increase in Nouna as the  
44  
45  
46  
47  
48  
49  
50  
51  
52  
53  
54  
55  
56  
57  
58  
59  
60

1  
2  
3 epidemiological transition progresses, increasing the proportion of deaths attributable  
4 to NCD in the future.  
5  
6

7  
8 Daily respiratory YLL increased by 2.81 (-1.54 to 7.16) in Guangzhou at 28°C versus  
9 32°C [21] where infectious and chronic respiratory deaths were grouped together as  
10 ICD-10 J00-99. In this analysis, however, chronic respiratory YLL (ICD-10 J30-98)  
11 only contributed to 2% of total NCD-YLL in Nouna. The separation of chronic and  
12 acute respiratory outcomes maybe relevant for comparing findings from different  
13 studies and understanding the causal mechanisms. Digestive, renal and  
14 neuropsychiatric causes contributed substantially to overall NCD-YLL in Nouna.  
15 Heat is known to trigger renal [25] and mental health-related deaths [26], however,  
16 the link to chronic digestive causes requires further investigation.  
17  
18  
19  
20  
21  
22  
23

24 Although excess NCD-YLL for women was elevated with heat exposure, male NCD-  
25 YLL were affected by a greater magnitude at lag 0-2. One explanation is that men  
26 working outdoors might have higher exposed to ambient heat. Occupational stress has  
27 been associated with excess risk of NCD morbidity including psychological  
28 distress[27] and kidney disease [28]. These results are somewhat unexpected  
29 considering that women in Nouna are exposed to extra heat from cooking and  
30 carrying wood/water for 2-3 hours daily. Women might die prematurely from other  
31 causes such as childbirth, leaving men to be more affected by diseases associated with  
32 longevity such as cardiovascular disease, however, further investigation of gender  
33 differences is warranted.  
34  
35  
36  
37  
38  
39  
40  
41  
42

43 Contrary to findings across 14 European cities [29], we found no evidence of  
44 harvesting effects with heat; gradual reduction in YLL across lag days ensuing the  
45 initial surge were not associated with significant subsequent negative associations or a  
46 rise again in risk estimates for any subgroups [22]. The public health relevance of our  
47 findings is therefore enhanced, as premature NCD mortality is not merely the  
48 advancement of death in frail individuals with pre-existing chronic conditions.  
49  
50  
51  
52  
53

54 This study has several strengths. An 11-year time series of reliable, high-quality data  
55 from a rural African setting was used to quantify the burden of temperature on NCD-  
56 YLL. Variables such as the date, age and cause of death were subject to quality  
57  
58  
59  
60



1  
2  
3 checks and continuous improvements at International Network for the Demographic  
4 Evaluation of Populations and Their Health (INDEPTH) sites including Nouna. These  
5 processes enabled one of the best quality and most extensive longitudinal health  
6 datasets in Africa and Asia to be used for this study. The DLNM accounted for non-  
7 linearity and lagged effects. In place of relative risks which would have been obtained  
8 had only death counts been used, combining life expectancy and death counts gave an  
9 absolute value for YLL from NCD, which is relevant for policy making [30]. Despite  
10 the low number of NCD deaths, significant effects of heat on premature mortality  
11 were detected, indicating that the effects were strong. The results in the final model  
12 were robust and withstood variations of model parameters. Rather than focusing only  
13 on anomalous weather events such as heatwaves, one of the longest time series  
14 available in rural Africa was exploited to highlight that excess premature deaths from  
15 NCD does not only occur during extreme heat, but with moderate heat.  
16  
17  
18  
19  
20  
21  
22  
23  
24  
25

26 Some limitations are also noted. Caution should be exercised in generalising these  
27 findings to all rural African settings. Temperature data were obtained from the nearest  
28 location with a similar temperature profile to Nouna. Air pollution data were  
29 unavailable to assess potential confounding effects of the exposure-response  
30 relationship. The lower resolution and distribution of weather data in Burkina Faso  
31 compared to Organisation for Economic Co-operation and Development (OECD)  
32 countries can make it challenging to obtain suitable weather data in Burkina Faso.  
33 Public health scientists ought to address this challenge by extending research beyond  
34 where the data are best, to where problems are the greatest and research/solutions  
35 most needed. It is likely that cancer or mental disorders were under-reported as  
36 sophisticated questionnaires and tests are needed to establish these causes. In 2004,  
37 the World Health Organization (WHO) estimated that NCD accounted for 20% of the  
38 burden of disease in Burkina Faso as a percentage of total DALYs (disability adjusted  
39 life years), which captures both premature death and life lived with disease [31]. We  
40 found only 7% of the burden from premature deaths or YLL in Nouna were from  
41 NCD. Although the YLL component of DALYs in the WHO estimate were obtained  
42 by multiplying the number of deaths at each age by the global standard life  
43 expectancy for each age (rather than the regional life expectancy for each age), the  
44 sole use of premature death is likely to have missed substantial burden from life lived  
45 with disease. Causal studies on the temperature-NCD association would benefit from  
46  
47  
48  
49  
50  
51  
52  
53  
54  
55  
56  
57  
58  
59  
60



1  
2  
3 using DALYs or quality adjusted life years (QALY) as the outcome measure,  
4 considering a large proportion of the burden of NCD comes from life lived with  
5 disease. The YLL lifetable approach does not differentiate health and  
6 sociodemographic risk profiles for each individual. Unfortunately, the sample size  
7 was insufficient to further stratify NCD by age (i.e. elderly) or subgroups such as  
8 cardiovascular causes. The use of longer time series in the future with larger sample  
9 sizes is likely to enable such breakdowns by cause or age, reducing the uncertainty  
10 from wide confidence bounds, and supporting better quantification of heat impacts on  
11 NCD-YLL.  
12  
13  
14  
15  
16  
17  
18  
19

### 20 **Conclusion**

21 In rural Sub Saharan Africa, where NCD are not the main cause of premature death,  
22 we found that moderate and extreme heat exposure significantly increases excess  
23 daily premature mortality from NCD. As NCD prevalence increases in Africa due to  
24 demographic, dietary and lifestyle changes, climate change will increasingly  
25 contribute as a risk factor towards the burden of deaths from NCD. Subsistence  
26 farming communities in Africa, such as Nouna, would therefore benefit from the  
27 development of early preventive measures to curb heat-associated NCD deaths.  
28  
29  
30  
31  
32  
33  
34

### 35 **Competing interests**

36 The authors declare they have no actual or potential competing financial interests  
37  
38  
39

### 40 **Acknowledgments**

41 We thank Dr David Hondula for help obtaining temperature data from the National  
42 Climatic Data Centre, USA, and Drs Adrian Barnett and Cunrui Huang for statistical  
43 modelling advice.  
44  
45  
46  
47

### 48 **Funding**

49 AB was funded by the Klaus-Tschira Stiftung gGmbH (00.128.2008). Funders had no  
50 direct role in study design, data collection, data analysis, interpretation or writing of  
51 the report.  
52  
53  
54  
55

### 56 **Data sharing**

57 No additional data are available.  
58  
59  
60

**Author contributions**

AB and RS developed the research idea with input from JR. Data were provided by AS. AB, MOS, JR and RS developed the modelling strategy. AB conducted the analysis, which was verified by MOS and RJ. AB wrote the manuscript. All authors contributed to revision of the manuscript.

For peer review only

## References

- 1 Niang I, Ruppel OC, Abdrabo MA, *et al.* Africa. In: *Climate Change 2014: Impacts, Adaptation, and Vulnerability. Part B: Regional Aspects. Contribution of Working Group II to the Fifth Assessment Report of the Intergovernmental Panel on Climate Change.* Cambridge University Press, Cambridge, United Kingdom and New York, NY, USA: 2014.
- 2 Hondula DM, Rocklöv J, Sankoh OA. Past, present, and future climate at select INDEPTH member Health and Demographic Surveillance Systems in Africa and Asia. *Glob Health Action* 2012;**5**:617–86.
- 3 Abegunde DO, Mathers CD, Adam T, *et al.* The burden and costs of chronic diseases in low-income and middle-income countries. *Lancet* 2007;**370**:1929–38.
- 4 World Health Organization. Burkina Faso. Non-communicable Diseases (NCD) Country Profiles. who.int. 2014.[http://www.who.int/nmh/countries/bfa\\_en.pdf](http://www.who.int/nmh/countries/bfa_en.pdf) (accessed 12 May 2016).
- 5 Friel S, Bowen K, Campbell-Lendrum D, *et al.* Climate Change, Noncommunicable Diseases, and Development: The Relationships and Common Policy Opportunities. *Annual review of public health* 2011;**32**:133–47.
- 6 D'Ippoliti D, Michelozzi P, Marino C, *et al.* The impact of heat waves on mortality in 9 European cities: results from the EuroHEAT project. 2010;**9**:37.
- 7 Fouillet A, Rey G, Laurent F, *et al.* Excess mortality related to the August 2003 heat wave in France. *Int Arch Occup Environ Health* 2006;**80**:16–24.
- 8 IPCC. Summary for Policymakers. In: *Climate Change 2013: The Physical Science Basis. Contribution of Working Group I to the Fifth Assessment Report of the Intergovernmental Panel on Climate Change.* Cambridge University Press, Cambridge, United Kingdom and New York, NY, USA.
- 9 Gasparrini A, Guo Y, Hashizume M, *et al.* Mortality risk attributable to high and low ambient temperature: a multicountry observational study. *Lancet* 2015;**386**:369–75.
- 10 Diboulo E, Sié A, Rocklöv J, *et al.* Weather and mortality: a 10 year retrospective analysis of the Nouna Health and Demographic Surveillance System, Burkina Faso. *Glob Health Action* 2012;**5**:1–8.
- 11 Egondi T, Kyobutungi C, Kovats S, *et al.* Time-series analysis of weather and mortality patterns in Nairobi's informal settlements. *Glob Health Action* 2012;**5**:1–10.
- 12 Egondi T, Kyobutungi C, Rocklöv J. Temperature variation and heat wave and cold spell impacts on years of life lost among the urban poor population of Nairobi, Kenya. *Int J Environ Res Public Health* 2015;**12**:2735–48.
- 13 Sié A, Louis VR, Gbangou A, *et al.* The Health and Demographic Surveillance

- 1  
2  
3 System (HDSS) in Nouna, Burkina Faso, 1993-2007. *Glob Health Action*  
4 2010;**3**.
- 5  
6 14 Ramroth H, Lorenz E, Rankin JC, *et al*. Cause of death distribution with InterVA  
7 and physician coding in a rural area of Burkina Faso. *Trop Med Int Health*  
8 2012;**17**:904–13.
- 9  
10 15 World Health Organization. The Global Burden of Disease. 2004 Update.  
11 Geneva: 2008.
- 12  
13 16 Murray CJ, Lopez AD, editors. The Global Burden of Disease. A comprehensive  
14 assessment of mortality and disability from diseases, injuries, and risk factors in  
15 1990 and projected to 2020: 1996.
- 16  
17 17 Pruss-Ustun A, Mathers C, Corvolan C, *et al*, editors. Introduction and methods:  
18 assessing the environmental burden of disease at national and local levels.  
19 Geneva: 2003.
- 20  
21 18 Murray CJL, Ezzati M, Flaxman AD, *et al*. GBD 2010: design, definitions, and  
22 metrics. *Lancet* 2012;**380**:2063–6.
- 23  
24 19 Huang C, Barnett AG, Wang X, *et al*. Effects of extreme temperatures on years  
25 of life lost for cardiovascular deaths: a time series study in Brisbane, Australia.  
26 *Circ Cardiovasc Qual Outcomes* 2012;**5**:609–14.
- 27  
28 20 Huang C, Barnett AG, Wang X, *et al*. The impact of temperature on years of life  
29 lost in Brisbane, Australia. *Nature Climate change* 2012;**2**:265–70.
- 30  
31 21 Yang J, Ou CQ, Guo Y, *et al*. The burden of ambient temperature on years of life  
32 lost in Guangzhou, China. *Sci Rep* 2015;**5**:12250.
- 33  
34 22 Basu R, Malig B. High ambient temperature and mortality in California:  
35 exploring the roles of age, disease, and mortality displacement. *Environmental*  
36 *Research* 2011;**111**:1286–92.
- 37  
38 23 Bhaskaran K, Gasparrini A, Hajat S, *et al*. Time series regression studies in  
39 environmental epidemiology. *Int J Epidemiol* 2013;**42**:1187–95.
- 40  
41 24 Keatinge WR, Coleshaw SR, Easton JC, *et al*. Increased platelet and red cell  
42 counts, blood viscosity, and plasma cholesterol levels during heat stress, and  
43 mortality from coronary and cerebral thrombosis. *Am J Med* 1986;**81**:795–800.
- 44  
45 25 Semenza JC, McCullough JE, Flanders WD, *et al*. Excess hospital admissions  
46 during the July 1995 heat wave in Chicago. *Am J Prev Med* 1999;**16**:269–77.
- 47  
48 26 Basu R, Samet JM. The potential impacts of climate variability and change on  
49 temperature-related morbidity and mortality in the United States. *Environ Health*  
50 *Perspect* 2002;**110**:1219–24.
- 51  
52 27 Tawatsupa B, Lim LL-Y, Kjellstrom T, *et al*. The association between overall  
53 health, psychological distress, and occupational heat stress among a large  
54 national cohort of 40,913 Thai workers. *Glob Health Action* 2010;**3**.
- 55  
56  
57  
58  
59  
60

- 1  
2  
3 28 Tawatsupa B, Lim LL-Y, Kjellstrom T, *et al.* Association between occupational  
4 heat stress and kidney disease among 37,816 workers in the Thai Cohort Study  
5 (TCS). *J Epidemiol* 2012;**22**:251–60.  
6  
7 29 Baccini M, Kosatsky T, Biggeri A. Impact of summer heat on urban population  
8 mortality in Europe during the 1990s: an evaluation of years of life lost adjusted  
9 for harvesting. *PLoS ONE* 2013;**8**:e69638.  
10  
11 30 Murray CJL, Lopez AD. Measuring the Global Burden of Disease. *N Engl J Med*  
12 2013;**369**:448–57.  
13  
14 31 World Health Organization Regional Office for Africa. Health Situation  
15 Analysis in the African Region. Brazzaville: 2011.  
16  
17  
18  
19  
20  
21  
22  
23  
24  
25  
26  
27  
28  
29  
30  
31  
32  
33  
34  
35  
36  
37  
38  
39  
40  
41  
42  
43  
44  
45  
46  
47  
48  
49  
50  
51  
52  
53  
54  
55  
56  
57  
58  
59  
60

1  
2  
3 **Figure 1:** Association of RR of NCD-YLL to maximum temperature and lag days,  
4 with reference to 36.4°C for all ages, males and females.  
5

6 **Figure 2:** Plots of 4-day (panel A-all age, B-male, and C-female), and 14-day (panel  
7 D-all age, E-male, and F-female) cumulative RR of NCD-YLL against maximum  
8 temperature (solid line) with 95% confidence bounds (grey area) for all ages, males  
9 and females in Nouna, Burkina Faso between 2000 and 2010. The reference  
10 temperature is 36.4°C. Note: to improve readability of the curves, the scales on the y-  
11 axis differ.  
12

13 **Figure 3:** Delayed effects of maximum temperature on the RR of NCD-YLL (solid  
14 line) and 95% confidence bounds (grey area) for all age, males and females in Nouna,  
15 Burkina Faso, by lag 0-14 days. Plots A-all age, B-male, and C-female represent cold  
16 effects at 30°C (5<sup>th</sup> percentile), and plots D-all age, E-male, and F-female represent  
17 heat effects at 41.7°C (95<sup>th</sup> percentile) of maximum temperature. The reference  
18 temperature is 36.4°C. Note: to improve readability of the curves, the scales on the y-  
19 axis differ.  
20  
21  
22

23 **Table 1:** Cause specific NCD outcomes with corresponding deaths and years of life  
24 lost. NCD accounted for 12% of total deaths, and 7% of total YLL in Nouna between  
25 2000-2010  
26

27 **Table 2:** Summary statistics of daily NCD deaths, NCD years of life lost and  
28 temperature in Nouna, Burkina Faso between 2000-2010.  
29

30 **Table 3a:** Cumulative relative risk (and 95% confidence bounds) of maximum  
31 temperature on non-communicable disease years of life lost in Nouna stratified across  
32 lag 0-4 and lag 0-14 days and gender between 2000-2010. Relative risks are presented  
33 for; heat effects as 38.9°C, 41.1°C and 41.7°C with reference to 36.4°C; cold effects  
34 as 30°C, 31.1°C and 33.3°C with reference to 36.4°C. Results controlled for long-  
35 term trends, season, day of the week, and heaping effect.  
36  
37

38 **Table 3b:** Cumulative excess average daily NCD-YLL (and 95% confidence bounds)  
39 stratified across lag 0-4 and lag 0-14 days and gender between 2000-2010. Relative  
40 risks were used to calculate excess average daily NCD-YLL as follows: (Average  
41 daily NCD-YLL of all-age, male or female \* relative risk) – Average daily NCD-  
42 YLL. NCD-YLL are presented for; heat effects as 42.8°C, 38.9°C, 41.1°C and 41.7°C  
43 with reference to 36.4°C; cold effects as 30°C, 31.1°C, 33.3°C and 27.8°C with  
44 reference to 36.4°C. Results controlled for long-term trends, season, day of the week,  
45 and heaping effect.  
46  
47

48 **Table 4a:** Relative risk (and 95% confidence bounds) of maximum temperature on  
49 non-communicable disease years of life lost in Nouna stratified by individual lag days  
50 for all age, males and females between 2000-2010. Relative risks are presented for  
51 heat effects as 41.7°C (95<sup>th</sup> percentile) with reference to 36.4°C, cold effects as 30°C  
52 (5<sup>th</sup> percentile) with reference to 36.4°C. Results controlled for long-term trends,  
53 season, day of the week, and heaping effect.  
54  
55

56 **Table 4b:** Excess average daily NCD-YLL (and 95% confidence bounds) in Nouna  
57 stratified by individual lag days for all age, males and females between 2000-2010.  
58  
59  
60

1  
2  
3  
4  
5  
6  
7  
8  
9  
10  
11  
12  
13  
14  
15  
16  
17  
18  
19  
20  
21  
22  
23  
24  
25  
26  
27  
28  
29  
30  
31  
32  
33  
34  
35  
36  
37  
38  
39  
40  
41  
42  
43  
44  
45  
46  
47  
48  
49  
50  
51  
52  
53  
54  
55  
56  
57  
58  
59  
60

Relative risks were used to calculate excess average daily NCD-YLL as follows:  
(Average daily NCD-YLL of all-age, male or female \* relative risk) – Average daily  
NCD-YLL. NCD-YLL are presented for heat effects as 41.7°C (95<sup>th</sup> percentile) with  
reference to 36.4°C, cold effects as 30°C (5<sup>th</sup> percentile) with reference to 36.4°C.  
Results controlled for long-term trends, season, day of the week, and heaping effect.

For peer review only

1  
2  
3  
4  
5  
6  
7  
8  
9  
10  
11  
12  
13  
14  
15  
16  
17  
18  
19  
20  
21  
22  
23  
24  
25  
26  
27  
28  
29  
30  
31  
32  
33  
34  
35  
36  
37  
38  
39  
40  
41  
42  
43  
44  
45  
46  
47  
48  
49  
50  
51  
52  
53  
54  
55  
56  
57  
58  
59  
60

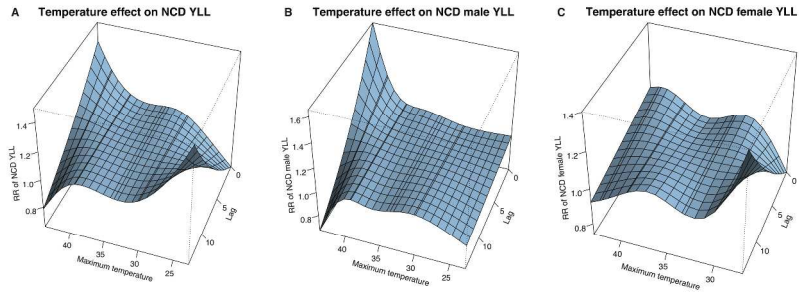

Association of RR of NCD-YLL to maximum temperature and lag days, with reference to 36.4°C for all ages, males and females.

296x419mm (300 x 300 DPI)



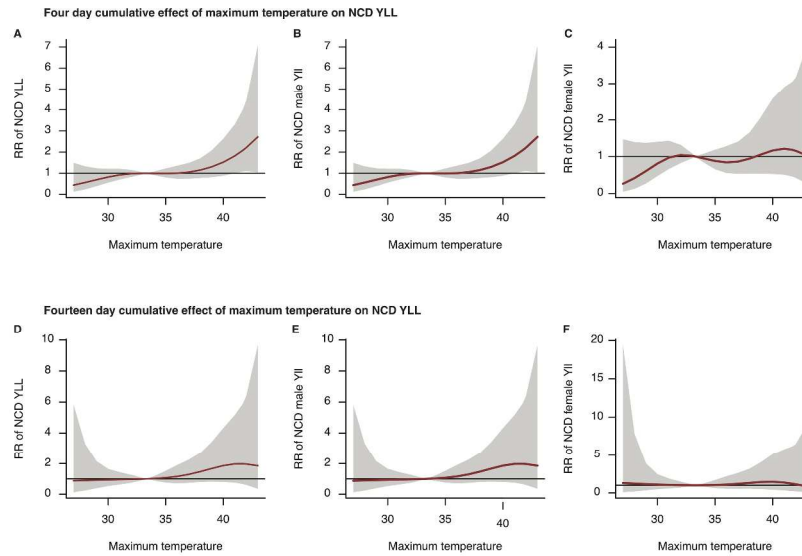

Plots of 4-day (panel A-all age, B-male, and C-female), and 14-day (panel D-all age, E-male, and F-female) cumulative RR of NCD-YLL against maximum temperature (solid line) with 95% confidence bounds (grey area) for all ages, males and females in Nouna, Burkina Faso between 2000 and 2010. The reference temperature is 36.4°C. Note: to improve readability of the curves, the scales on the y-axis differ.

296x419mm (300 x 300 DPI)

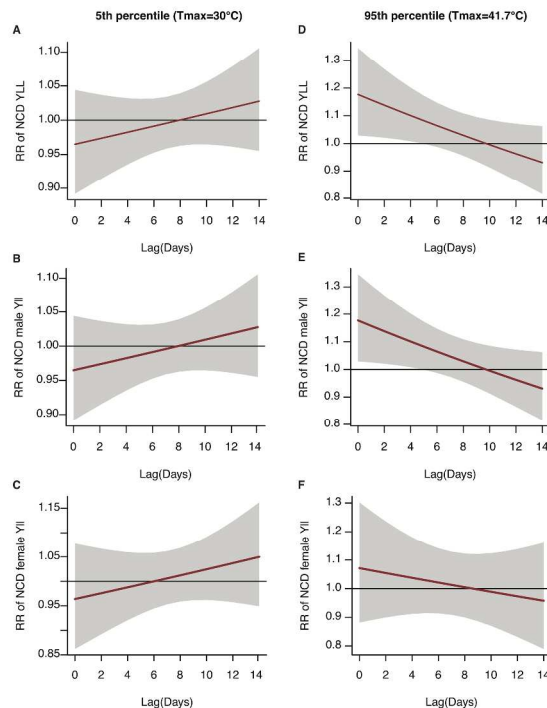

Delayed effects of maximum temperature on the RR of NCD-YLL (solid line) and 95% confidence bounds (grey area) for all age, males and females in Nouna, Burkina Faso, by lag 0-14 days. Plots A-all age, B-male, and C-female represent cold effects at 30°C (5th percentile), and plots D-all age, E-male, and F-female represent heat effects at 41.7°C (95th percentile) of maximum temperature. The reference temperature is 36.4°C. Note: to improve readability of the curves, the scales on the y-axis differ.

296x419mm (300 x 300 DPI)

1  
2  
3  
4  
5  
6  
7  
8  
9  
10  
11  
12  
13  
14  
15  
16  
17  
18  
19  
20  
21  
22  
23  
24  
25  
26  
27  
28  
29  
30  
31  
32  
33  
34  
35  
36  
37  
38  
39  
40  
41  
42  
43  
44  
45  
46  
47  
48  
49

| Disease                     | Death count | Death (%)  | YLL count    | YLL (%)    |
|-----------------------------|-------------|------------|--------------|------------|
| Cardiovascular diseases     | 461         | 58         | 9095         | 50         |
| Digestive diseases          | 137         | 17         | 3614         | 20         |
| Malignant neoplasms         | 81          | 10         | 1720         | 9          |
| Genitourinary diseases      | 38          | 5          | 1602         | 9          |
| Neuropsychiatric conditions | 37          | 5          | 1289         | 7          |
| Congenital anomalies        | 8           | 1          | 481          | 3          |
| Respiratory diseases        | 15          | 2          | 321          | 2          |
| Diabetes mellitus           | 11          | 1          | 167          | 1          |
| Other endocrine disorders   | 1           | 0          | 22           | 0          |
| Musculoskeletal diseases    | 1           | 0          | 57           | 0          |
| <b>Total</b>                | <b>790</b>  | <b>100</b> | <b>18367</b> | <b>100</b> |

| Daily NCD and temperature descriptive statistics 2000-2010 |         |      |      |      |      |         |
|------------------------------------------------------------|---------|------|------|------|------|---------|
|                                                            | Minimum | 25%  | 50%  | Mean | 75%  | Maximum |
| <b>Daily number of NCD deaths</b>                          |         |      |      |      |      |         |
| <b>Total</b>                                               | 0       | 0    | 0    | 0.2  | 0    | 5       |
| <b>Male</b>                                                | 0       | 0    | 0    | 0.1  | 0    | 4       |
| <b>Female</b>                                              | 0       | 0    | 0    | 0.1  | 0    | 3       |
| <b>&gt;65 years</b>                                        | 0       | 0    | 0    | 0.1  | 0    | 3       |
| <b>Daily NCD years of life lost</b>                        |         |      |      |      |      |         |
| <b>Total</b>                                               | 0       | 0    | 0    | 4.6  | 0    | 154     |
| <b>Male</b>                                                | 0       | 0    | 0    | 2.4  | 0    | 118.9   |
| <b>Female</b>                                              | 0       | 0    | 0    | 2.1  | 0    | 127.5   |
| <b>&gt;65 years</b>                                        | 0       | 0    | 0    | 0.9  | 0    | 39.2    |
| <b>Temperature (°C)</b>                                    |         |      |      |      |      |         |
| <b>Daily minimum</b>                                       | 3.3     | 21.1 | 22.8 | 23.1 | 25   | 32.8    |
| <b>Daily average</b>                                       | 17.2    | 27.5 | 29.2 | 29.6 | 31.7 | 37.8    |
| <b>Daily maximum</b>                                       | 22.8    | 33.3 | 36.4 | 36.1 | 38.9 | 43.9    |

1  
2  
3  
4  
5  
6  
7  
8  
9  
10  
11  
12  
13  
14  
15  
16  
17  
18  
19  
20  
21  
22  
23  
24  
25  
26  
27  
28  
29  
30  
31  
32  
33  
34  
35  
36  
37  
38  
39  
40  
41  
42  
43  
44  
45  
46  
47  
48  
49

|                           | 27.8°C<br>(1st percentile) | 30°C<br>(5th percentile) | 31.1°C<br>(10th percentile) | 33.3°C<br>(25th percentile) | 38.9°C<br>(75th percentile) | 41.4°C<br>(90th percentile) | 41.7°C<br>(95th percentile) | 42.8°C<br>(99th percentile) |
|---------------------------|----------------------------|--------------------------|-----------------------------|-----------------------------|-----------------------------|-----------------------------|-----------------------------|-----------------------------|
|                           | 34 days below 27.8°C       | 174 days below 30°C      | 325 days below 31.3°C       | 912 days below 33.3°C       | 883 days above 38.9°C       | 300 days above 41.4°C       | 189 days above 41.7°C       | 28 days above 42.8°C        |
|                           | RR (95% CI)                | RR (95% CI)              | RR (95% CI)                 | RR (95% CI)                 | RR (95% CI)                 | RR (95% CI)                 | RR (95% CI)                 | RR (95% CI)                 |
| <b>Lag structure 0-4</b>  |                            |                          |                             |                             |                             |                             |                             |                             |
| All age                   | 0.54 (0.22 to 1.36)        | 0.82 (0.56 to 1.21)      | 0.93 (0.72 to 1.21)         | 1.00 (0.99 to 1.01)         | 1.29 (0.81 to 2.04)         | 1.96 (1.05 to 3.67)         | 2.08 (1.08 to 4.01)         | 2.61 (1.07 to 6.35)         |
| Male                      | 0.53 (0.15 to 1.86)        | 0.77 (0.46 to 1.3)       | 0.88 (0.62 to 1.25)         | 1.00 (0.99 to 1.01)         | 1.36 (0.74 to 2.49)         | 2.56 (1.14 to 5.75)         | 2.86 (1.23 to 6.69)         | 4.60 (1.45 to 14.64)        |
| Female                    | 0.38 (0.10 to 1.41)        | 0.81 (0.47 to 1.4)       | 0.99 (0.68 to 1.43)         | 1.00 (0.99 to 1.01)         | 1.05 (0.54 to 2.04)         | 1.20 (0.49 to 2.98)         | 1.19 (0.46 to 3.05)         | 1.06 (0.30 to 3.79)         |
| <b>Lag structure 0-14</b> |                            |                          |                             |                             |                             |                             |                             |                             |
| All age                   | 0.89 (0.22 to 3.67)        | 0.94 (0.53 to 1.65)      | 0.96 (0.64 to 1.42)         | 1.00 (0.99 to 1.01)         | 1.65 (0.82 to 3.35)         | 1.98 (0.71 to 5.54)         | 1.98 (0.66 to 5.91)         | 1.88 (0.41 to 8.75)         |
| Male                      | 0.71 (0.11 to 4.63)        | 0.91 (0.43 to 1.94)      | 0.97 (0.57 to 1.66)         | 1.00 (0.99 to 1.01)         | 1.57 (0.62 to 3.97)         | 2.11 (0.57 to 7.85)         | 2.14 (0.53 to 8.70)         | 2.16 (0.29 to 16.35)        |
| Female                    | 1.24 (0.16 to 9.27)        | 1.09 (0.49 to 2.46)      | 1.05 (0.59 to 1.84)         | 1.00 (0.98 to 1.02)         | 1.42 (0.50 to 3.99)         | 1.28 (0.28 to 5.97)         | 1.21 (0.24 to 6.17)         | 0.92 (0.10 to 8.30)         |

|                           | 27.8°C<br>(1st percentile) | 30°C<br>(5th percentile) | 31.1°C<br>(10th percentile) | 33.3°C<br>(25th percentile) | 38.9°C<br>(75th percentile) | 41.4°C<br>(90th percentile) | 41.7°C<br>(95th percentile) | 42.8°C<br>(99th percentile) |
|---------------------------|----------------------------|--------------------------|-----------------------------|-----------------------------|-----------------------------|-----------------------------|-----------------------------|-----------------------------|
|                           | 34 days below 27.8°C       | 174 days below 30°C      | 325 days below 31.3°C       | 912 days below 33.3°C       | 883 days above 38.9°C       | 300 days above 41.4°C       | 189 days above 41.7°C       | 28 days above 42.8°C        |
|                           | YLL (95% CI)               | YLL (95% CI)             | YLL (95% CI)                | YLL (95% CI)                | YLL (95% CI)                | YLL (95% CI)                | YLL (95% CI)                | YLL (95% CI)                |
| <b>Lag structure 0-4</b>  |                            |                          |                             |                             |                             |                             |                             |                             |
| <b>All age</b>            | -2.11 (-3.61 to 1.64)      | -0.81 (-2.02 to 0.97)    | -0.31 (-1.30 to 0.97)       | 0.00 (-0.03 to 0.03)        | 1.33 (-0.86 to 4.80)        | 4.44 (0.24 to 12.28)        | 4.98 (0.38 to 13.83)        | 7.39 (0.32 to 24.62)        |
| <b>Male</b>               | -1.13 (-2.04 to 2.06)      | -0.55 (-1.30 to 0.72)    | -0.29 (-0.92 to 0.59)       | 0.00 (-0.03 to 0.02)        | 0.86 (-0.62 to 3.57)        | 3.73 (0.33 to 11.39)        | 4.48 (0.54 to 13.65)        | 8.65 (1.07 to 32.73)        |
| <b>Female</b>             | -1.30 (-1.88 to 0.86)      | -0.39 (-1.11 to 0.85)    | -0.03 (-0.66 to 0.90)       | 0.01 (-0.01 to 0.03)        | 0.10 (-0.97 to 2.19)        | 0.43 (-1.08 to 4.16)        | 0.39 (-1.13 to 4.32)        | 0.12 (-1.48 to 5.86)        |
| <b>Lag structure 0-14</b> |                            |                          |                             |                             |                             |                             |                             |                             |
| <b>All age</b>            | -0.48 (-3.6 to 12.27)      | -0.28 (-2.15 to 3.01)    | -0.20 (-1.64 to 1.95)       | -0.01 (-0.06 to 0.04)       | 3.01 (-0.84 to 10.82)       | 4.53 (-1.33 to 20.89)       | 4.5 (-1.55 to 22.57)        | 4.07 (-2.73 to 35.66)       |
| <b>Male</b>               | -0.70 (-2.14 to 8.71)      | -0.21 (-1.37 to 2.25)    | -0.06 (-1.03 to 1.58)       | 0.00 (-0.04 to 0.04)        | 1.38 (-0.90 to 7.12)        | 2.67 (-1.03 to 16.44)       | 2.74 (-1.14 to 18.48)       | 2.78 (-1.72 to 36.83)       |
| <b>Female</b>             | 0.50 (-1.75 to 17.37)      | 0.20 (-1.08 to 3.07)     | 0.09 (-0.86 to 1.77)        | 0.00 (-0.03 to 0.03)        | 0.87 (-1.05 to 6.28)        | 0.59 (-1.52 to 10.44)       | 0.44 (-1.60 to 10.86)       | -0.18 (-1.89 to 15.32)      |

1  
2  
3  
4  
5  
6  
7  
8  
9  
10  
11  
12  
13  
14  
15  
16  
17  
18  
19  
20  
21  
22  
23  
24  
25  
26  
27  
28  
29  
30  
31  
32  
33  
34  
35  
36  
37  
38  
39  
40  
41  
42  
43  
44  
45  
46  
47  
48  
49

|       | All age               |                          | Male                  |                          | Female                |                          |
|-------|-----------------------|--------------------------|-----------------------|--------------------------|-----------------------|--------------------------|
|       | 30°C (5th percentile) | 41.7°C (95th percentile) | 30°C (5th percentile) | 41.7°C (95th percentile) | 30°C (5th percentile) | 41.7°C (95th percentile) |
|       | RR (95% CI)           |                          | RR (95% CI)           |                          | RR (95% CI)           |                          |
| lag0  | 0.96 (0.89 to 1.04)   | 1.18 (1.03 to 1.35)      | 0.96 (0.87 to 1.07)   | 1.24 (1.04 to 1.48)      | 0.96 (0.86 to 1.08)   | 1.07 (0.88 to 1.30)      |
| lag1  | 0.97 (0.90 to 1.04)   | 1.16 (1.03 to 1.31)      | 0.97 (0.88 to 1.06)   | 1.21 (1.04 to 1.42)      | 0.97 (0.88 to 1.07)   | 1.06 (0.89 to 1.27)      |
| lag2  | 0.97 (0.91 to 1.04)   | 1.14 (1.02 to 1.27)      | 0.97 (0.9 to 1.05)    | 1.19 (1.03 to 1.36)      | 0.98 (0.89 to 1.07)   | 1.05 (0.90 to 1.24)      |
| lag3  | 0.98 (0.92 to 1.03)   | 1.12 (1.01 to 1.23)      | 0.98 (0.91 to 1.05)   | 1.16 (1.02 to 1.31)      | 0.98 (0.91 to 1.06)   | 1.05 (0.91 to 1.21)      |
| lag4  | 0.98 (0.94 to 1.03)   | 1.10 (1.01 to 1.20)      | 0.98 (0.92 to 1.05)   | 1.13 (1.01 to 1.27)      | 0.99 (0.92 to 1.06)   | 1.04 (0.91 to 1.18)      |
| lag5  | 0.99 (0.94 to 1.03)   | 1.08 (1.00 to 1.17)      | 0.99 (0.93 to 1.04)   | 1.10 (1.00 to 1.22)      | 0.99 (0.93 to 1.06)   | 1.03 (0.91 to 1.16)      |
| lag6  | 0.99 (0.95 to 1.03)   | 1.06 (0.99 to 1.15)      | 0.99 (0.94 to 1.04)   | 1.08 (0.98 to 1.19)      | 1.00 (0.94 to 1.06)   | 1.02 (0.91 to 1.14)      |
| lag7  | 1.00 (0.96 to 1.03)   | 1.05 (0.97 to 1.13)      | 0.99 (0.95 to 1.05)   | 1.05 (0.96 to 1.16)      | 1.01 (0.95 to 1.06)   | 1.01 (0.91 to 1.13)      |
| lag8  | 1.00 (0.96 to 1.04)   | 1.03 (0.96 to 1.11)      | 1.00 (0.95 to 1.05)   | 1.03 (0.93 to 1.13)      | 1.01 (0.96 to 1.07)   | 1.00 (0.90 to 1.12)      |
| lag9  | 1.00 (0.96 to 1.05)   | 1.01 (0.94 to 1.10)      | 1.00 (0.95 to 1.06)   | 1.00 (0.91 to 1.11)      | 1.02 (0.96 to 1.08)   | 1.00 (0.89 to 1.12)      |
| lag10 | 1.01 (0.96 to 1.06)   | 1.00 (0.91 to 1.09)      | 1.01 (0.95 to 1.07)   | 0.98 (0.88 to 1.09)      | 1.02 (0.96 to 1.09)   | 0.99 (0.87 to 1.12)      |
| lag11 | 1.01 (0.96 to 1.07)   | 0.98 (0.89 to 1.08)      | 1.01 (0.94 to 1.08)   | 0.96 (0.85 to 1.08)      | 1.03 (0.96 to 1.11)   | 0.98 (0.85 to 1.13)      |
| lag12 | 1.02 (0.96 to 1.08)   | 0.96 (0.86 to 1.07)      | 1.02 (0.94 to 1.10)   | 0.93 (0.81 to 1.07)      | 1.04 (0.96 to 1.12)   | 0.97 (0.83 to 1.14)      |
| lag13 | 1.02 (0.96 to 1.09)   | 0.95 (0.84 to 1.07)      | 1.02 (0.93 to 1.12)   | 0.91 (0.78 to 1.06)      | 1.04 (0.95 to 1.14)   | 0.97 (0.81 to 1.15)      |
| lag14 | 1.03 (0.96 to 1.11)   | 0.93 (0.82 to 1.06)      | 1.03 (0.93 to 1.13)   | 0.89 (0.75 to 1.06)      | 1.05 (0.95 to 1.16)   | 0.96 (0.79 to 1.16)      |

|              | All age               |                          | Male                  |                          | Female                |                          |
|--------------|-----------------------|--------------------------|-----------------------|--------------------------|-----------------------|--------------------------|
|              | 30°C (5th percentile) | 41.7°C (95th percentile) | 30°C (5th percentile) | 41.7°C (95th percentile) | 30°C (5th percentile) | 41.7°C (95th percentile) |
|              | 174 days below 30°C   | 189 days above 41.7°C    | 174 days below 30°C   | 189 days above 41.7°C    | 174 days below 30°C   | 189 days above 41.7°C    |
|              | YLL (95% CI)          |                          | YLL (95% CI)          |                          | YLL (95% CI)          |                          |
| <b>lag0</b>  | -0.16 (-0.50 to 0.20) | 0.81 (0.13 to 1.59)      | -0.09 (-0.31 to 0.16) | 0.58 (0.11 to 1.15)      | -0.08 (-0.29 to 0.16) | 0.15 (-0.25 to 0.63)     |
| <b>lag1</b>  | -0.14 (-0.45 to 0.19) | 0.72 (0.12 to 1.41)      | -0.08 (-0.28 to 0.15) | 0.51 (0.09 to 1.01)      | -0.06 (-0.26 to 0.15) | 0.13 (-0.23 to 0.56)     |
| <b>lag2</b>  | -0.12 (-0.40 to 0.17) | 0.63 (0.09 to 1.24)      | -0.07 (-0.25 to 0.13) | 0.44 (0.07 to 0.87)      | -0.05 (-0.23 to 0.14) | 0.11 (-0.21 to 0.50)     |
| <b>lag3</b>  | -0.10 (-0.35 to 0.16) | 0.55 (0.07 to 1.08)      | -0.06 (-0.22 to 0.12) | 0.38 (0.05 to 0.75)      | -0.04 (-0.20 to 0.13) | 0.10 (-0.20 to 0.43)     |
| <b>lag4</b>  | -0.08 (-0.30 to 0.15) | 0.46 (0.04 to 0.93)      | -0.05 (-0.19 to 0.11) | 0.31 (0.02 to 0.64)      | -0.03 (-0.17 to 0.13) | 0.08 (-0.19 to 0.38)     |
| <b>lag5</b>  | -0.06 (-0.25 to 0.14) | 0.38 (0.00 to 0.79)      | -0.04 (-0.17 to 0.10) | 0.25 (-0.01 to 0.54)     | -0.01 (-0.14 to 0.12) | 0.06 (-0.18 to 0.33)     |
| <b>lag6</b>  | -0.04 (-0.22 to 0.14) | 0.30 (-0.06 to 0.68)     | -0.03 (-0.15 to 0.10) | 0.19 (-0.05 to 0.45)     | 0.00 (-0.12 to 0.12)  | 0.04 (-0.18 to 0.30)     |
| <b>lag7</b>  | -0.02 (-0.19 to 0.16) | 0.21 (-0.12 to 0.58)     | -0.01 (-0.13 to 0.11) | 0.12 (-0.10 to 0.37)     | 0.01 (-0.10 to 0.13)  | 0.03 (-0.19 to 0.27)     |
| <b>lag8</b>  | 0.00 (-0.17 to 0.18)  | 0.13 (-0.20 to 0.50)     | 0.00 (-0.12 to 0.12)  | 0.07 (-0.16 to 0.31)     | 0.03 (-0.09 to 0.14)  | 0.01 (-0.21 to 0.26)     |
| <b>lag9</b>  | 0.02 (-0.16 to 0.21)  | 0.06 (-0.30 to 0.44)     | 0.01 (-0.12 to 0.14)  | 0.01 (-0.22 to 0.26)     | 0.04 (-0.08 to 0.17)  | -0.01 (-0.24 to 0.25)    |
| <b>lag10</b> | 0.04 (-0.16 to 0.26)  | -0.02 (-0.40 to 0.39)    | 0.02 (-0.13 to 0.17)  | -0.05 (-0.30 to 0.23)    | 0.05 (-0.08 to 0.19)  | -0.02 (-0.27 to 0.26)    |
| <b>lag11</b> | 0.06 (-0.17 to 0.31)  | -0.10 (-0.51 to 0.36)    | 0.03 (-0.14 to 0.20)  | -0.10 (-0.37 to 0.2)     | 0.07 (-0.08 to 0.22)  | -0.04 (-0.31 to 0.27)    |
| <b>lag12</b> | 0.08 (-0.18 to 0.36)  | -0.17 (-0.62 to 0.33)    | 0.04 (-0.15 to 0.24)  | -0.16 (-0.45 to 0.17)    | 0.08 (-0.09 to 0.26)  | -0.06 (-0.35 to 0.29)    |
| <b>lag13</b> | 0.11 (-0.19 to 0.42)  | -0.25 (-0.74 to 0.31)    | 0.05 (-0.16 to 0.28)  | -0.21 (-0.52 to 0.15)    | 0.09 (-0.10 to 0.30)  | -0.07 (-0.40 to 0.31)    |
| <b>lag14</b> | 0.13 (-0.21 to 0.49)  | -0.32 (-0.85 to 0.29)    | 0.06 (-0.17 to 0.32)  | -0.26 (-0.60 to 0.13)    | 0.11 (-0.11 to 0.34)  | -0.09 (-0.44 to 0.34)    |



STROBE Statement—Checklist of items that should be included in reports of *cohort studies*

|                              | Item No | Recommendation                                                                                                                                                                                                                                                                                                                                                   |
|------------------------------|---------|------------------------------------------------------------------------------------------------------------------------------------------------------------------------------------------------------------------------------------------------------------------------------------------------------------------------------------------------------------------|
| <b>Title and abstract</b>    | 1       | (a) Indicate the study's design with a commonly used term in the title or the abstract [within title page and abstract under 'design']<br>(b) Provide in the abstract an informative and balanced summary of what was done and what was found [see abstract under 'results']                                                                                     |
| <b>Introduction</b>          |         |                                                                                                                                                                                                                                                                                                                                                                  |
| Background/rationale         | 2       | Explain the scientific background and rationale for the investigation being reported [pg 4]                                                                                                                                                                                                                                                                      |
| Objectives                   | 3       | State specific objectives, including any prespecified hypotheses [pg 5]                                                                                                                                                                                                                                                                                          |
| <b>Methods</b>               |         |                                                                                                                                                                                                                                                                                                                                                                  |
| Study design                 | 4       | Present key elements of study design early in the paper [pg 5-8]                                                                                                                                                                                                                                                                                                 |
| Setting                      | 5       | Describe the setting, locations, and relevant dates, including periods of recruitment, exposure, follow-up, and data collection [pg 5-7]                                                                                                                                                                                                                         |
| Participants                 | 6       | (a) Give the eligibility criteria, and the sources and methods of selection of participants. Describe methods of follow-up [pg 5-7]<br>(b) For matched studies, give matching criteria and number of exposed and unexposed [n/a]                                                                                                                                 |
| Variables                    | 7       | Clearly define all outcomes, exposures, predictors, potential confounders, and effect modifiers. Give diagnostic criteria, if applicable [pg 5-8]                                                                                                                                                                                                                |
| Data sources/<br>measurement | 8*      | For each variable of interest, give sources of data and details of methods of assessment (measurement). Describe comparability of assessment methods if there is more than one group [pg 5-8]                                                                                                                                                                    |
| Bias                         | 9       | Describe any efforts to address potential sources of bias [n/a]                                                                                                                                                                                                                                                                                                  |
| Study size                   | 10      | Explain how the study size was arrived at [n/a]                                                                                                                                                                                                                                                                                                                  |
| Quantitative variables       | 11      | Explain how quantitative variables were handled in the analyses. If applicable, describe which groupings were chosen and why [pg 8-9]                                                                                                                                                                                                                            |
| Statistical methods          | 12      | (a) Describe all statistical methods, including those used to control for confounding [for all statistical methods a-e: pg 7-9]<br>(b) Describe any methods used to examine subgroups and interactions<br>(c) Explain how missing data were addressed<br>(d) If applicable, explain how loss to follow-up was addressed<br>(e) Describe any sensitivity analyses |
| <b>Results</b>               |         |                                                                                                                                                                                                                                                                                                                                                                  |
| Participants                 | 13*     | (a) Report numbers of individuals at each stage of study—eg numbers potentially eligible, examined for eligibility, confirmed eligible, included in the study, completing follow-up, and analysed [n/a]<br>(b) Give reasons for non-participation at each stage<br>(c) Consider use of a flow diagram                                                            |
| Descriptive data             | 14*     | (a) Give characteristics of study participants (eg demographic, clinical, social) and information on exposures and potential confounders [for all descriptive data a-c: pg 9, Table 2]<br>(b) Indicate number of participants with missing data for each variable of interest<br>(c) Summarise follow-up time (eg, average and total amount)                     |
| Outcome data                 | 15*     | Report numbers of outcome events or summary measures over time [pg 9-11, Table 1,2]                                                                                                                                                                                                                                                                              |
| Main results                 | 16      | (a) Give unadjusted estimates and, if applicable, confounder-adjusted estimates and                                                                                                                                                                                                                                                                              |

|                          |    |                                                                                                                                                                                           |
|--------------------------|----|-------------------------------------------------------------------------------------------------------------------------------------------------------------------------------------------|
|                          |    | their precision (eg, 95% confidence interval). Make clear which confounders were adjusted for and why they were included [all main results <i>a-c</i> : pg 9-11, Tables 3-4, Figures 1-3] |
|                          |    | (b) Report category boundaries when continuous variables were categorized                                                                                                                 |
|                          |    | (c) If relevant, consider translating estimates of relative risk into absolute risk for a meaningful time period                                                                          |
| Other analyses           | 17 | Report other analyses done—eg analyses of subgroups and interactions, and sensitivity analyses [pg 11]                                                                                    |
| <b>Discussion</b>        |    |                                                                                                                                                                                           |
| Key results              | 18 | Summarise key results with reference to study objectives [pg 11]                                                                                                                          |
| Limitations              | 19 | Discuss limitations of the study, taking into account sources of potential bias or imprecision. Discuss both direction and magnitude of any potential bias [pg 14]                        |
| Interpretation           | 20 | Give a cautious overall interpretation of results considering objectives, limitations, multiplicity of analyses, results from similar studies, and other relevant evidence [pg 11-13]     |
| Generalisability         | 21 | Discuss the generalisability (external validity) of the study results [pg 14]                                                                                                             |
| <b>Other information</b> |    |                                                                                                                                                                                           |
| Funding                  | 22 | Give the source of funding and the role of the funders for the present study and, if applicable, for the original study on which the present article is based [pg 15]                     |

\*Give information separately for exposed and unexposed groups.

**Note:** An Explanation and Elaboration article discusses each checklist item and gives methodological background and published examples of transparent reporting. The STROBE checklist is best used in conjunction with this article (freely available on the Web sites of PLoS Medicine at <http://www.plosmedicine.org/>, Annals of Internal Medicine at <http://www.annals.org/>, and Epidemiology at <http://www.epidem.com/>). Information on the STROBE Initiative is available at <http://www.strobe-statement.org>.
