# Supplementary material for: Excess burden of non-communicable disease years of life lost from heat in rural Burkina Faso: a time series analysis of the years 2000–2010
Source: PubMed Central journal article supplement — BMJ Open. 2017 Nov 4;7(11):e018068. doi: 10.1136/bmjopen-2017-018068 (PMC5695355; doi:10.1136/bmjopen-2017-018068), 2017-11-04
Supplement: bmjopen-2017-018068supp001.pdf [file bmjopen-2017-018068supp001.pdf]

## Supplementary File

### Excess burden of non-communicable disease years of life lost from heat in rural Burkina Faso: a time-series analysis of the years 2000-2010

Aditi Bunker, Maquins Odhiambo Sewe, Ali Sie, Joacim Rocklöv, Rainer Sauerborn

#### Nouna life table development with R software

Vital statistics including the unique identifying number (ID), date of birth, date of immigration into the HDSS, date of death, date of emigration from the HDSS and gender were used to calculate age standardized death rates (ASDR) separately for males and females. The gender-specific ASDRs were used to generate mean additional survival time for each respective age band.

**Supplementary Table 1:** Male life table for the Nouna population.

| Age group | Male ASDR | Conditional probabilities of death in age interval (Initial) | Number of people having Xth birthday | Total number of deaths in age interval | Total number of person years spent in age interval | Total number of persons years lived by those aged x and over | Male mean additional survival time at age X | max--- Initial | Interval |
|-----------|-----------|--------------------------------------------------------------|--------------------------------------|----------------------------------------|----------------------------------------------------|--------------------------------------------------------------|---------------------------------------------|----------------|----------|
| [0-1]     | 0.05174   | 0.0493                                                       | 100000                               | 4934                                   | 95362                                              | 5801098                                                      | 58.0                                        | 0.06           | 1        |
| [1-5)     | 0.02025   | 0.0773                                                       | 95066                                | 7349                                   | 362877                                             | 5705736                                                      | 60.0                                        | 1.634          | 4        |
| [5-9)     | 0.00271   | 0.0135                                                       | 87717                                | 1181                                   | 435636                                             | 5342858                                                      | 60.9                                        | 2.500          | 5        |
| [10-14)   | 0.00169   | 0.0084                                                       | 86537                                | 728                                    | 430865                                             | 4907223                                                      | 56.7                                        | 2.500          | 5        |
| [15-19)   | 0.00213   | 0.0106                                                       | 85809                                | 908                                    | 427128                                             | 4476357                                                      | 52.2                                        | 2.888          | 5        |
| [20-24)   | 0.00197   | 0.0098                                                       | 84901                                | 834                                    | 422516                                             | 4049229                                                      | 47.7                                        | 2.614          | 5        |
| [25-29)   | 0.00268   | 0.0133                                                       | 84067                                | 1121                                   | 417549                                             | 3626714                                                      | 43.1                                        | 2.513          | 5        |
| [30-34)   | 0.00375   | 0.0186                                                       | 82947                                | 1540                                   | 410920                                             | 3209164                                                      | 38.7                                        | 2.525          | 5        |
| [35-39)   | 0.00670   | 0.0329                                                       | 81406                                | 2682                                   | 400487                                             | 2798244                                                      | 34.4                                        | 2.560          | 5        |
| [40-44)   | 0.00718   | 0.0353                                                       | 78724                                | 2779                                   | 386943                                             | 2397757                                                      | 30.5                                        | 2.597          | 5        |
| [45-49)   | 0.01037   | 0.0506                                                       | 75945                                | 3844                                   | 370750                                             | 2010814                                                      | 26.5                                        | 2.665          | 5        |
| [50-54)   | 0.01373   | 0.0666                                                       | 72101                                | 4799                                   | 349454                                             | 1640064                                                      | 22.7                                        | 2.697          | 5        |
| [55-59)   | 0.01989   | 0.0951                                                       | 67302                                | 6401                                   | 321795                                             | 1290611                                                      | 19.2                                        | 2.701          | 5        |
| [60-64)   | 0.02682   | 0.1263                                                       | 60901                                | 7694                                   | 286842                                             | 968815                                                       | 15.9                                        | 2.704          | 5        |
| [65-69)   | 0.03897   | 0.1787                                                       | 53208                                | 9508                                   | 244007                                             | 681974                                                       | 12.8                                        | 2.683          | 5        |
| [70-74)   | 0.06415   | 0.2786                                                       | 43699                                | 12175                                  | 189788                                             | 437966                                                       | 10.0                                        | 2.642          | 5        |
| [75-79)   | 0.09484   | 0.3858                                                       | 31524                                | 12163                                  | 128247                                             | 248179                                                       | 7.9                                         | 2.585          | 5        |
| [80-84)   | 0.13669   | 0.5099                                                       | 19361                                | 9873                                   | 72223                                              | 119932                                                       | 6.2                                         | 2.510          | 5        |
| 85+       | 0.19889   | 1.0000                                                       | 9489                                 | 9489                                   | 47709                                              | 47709                                                        | 5.0                                         | 2.351          | 5        |

**Supplementary Table 2: Female life table for the Nouna population.**

| Age group | Female ASDR | Conditional probabilities of death in age interval (Initial) | Number of people having Xth birthday | Total number of deaths in age interval | Total number of person years spent in age interval | Total number of persons years lived by those aged x and over | Female mean additional survival time at age X | max--- Initial | Interval |
|-----------|-------------|--------------------------------------------------------------|--------------------------------------|----------------------------------------|----------------------------------------------------|--------------------------------------------------------------|-----------------------------------------------|----------------|----------|
| [0-1]     | 0.04829     | 0.0462                                                       | 100000                               | 4619                                   | 95658                                              | 6151128                                                      | 61.5                                          | 0.06           | 1        |
| [1-5)     | 0.01761     | 0.0676                                                       | 95381                                | 6449                                   | 366267                                             | 6055469                                                      | 63.5                                          | 1.634          | 4        |
| [5-9)     | 0.00253     | 0.0125                                                       | 88932                                | 1116                                   | 441872                                             | 5689203                                                      | 64.0                                          | 2.500          | 5        |
| [10-14)   | 0.00154     | 0.0077                                                       | 87817                                | 672                                    | 437402                                             | 5247331                                                      | 59.8                                          | 2.500          | 5        |
| [15-19)   | 0.00231     | 0.0115                                                       | 87144                                | 1002                                   | 433606                                             | 4809928                                                      | 55.2                                          | 2.888          | 5        |
| [20-24)   | 0.00221     | 0.0110                                                       | 86143                                | 948                                    | 428451                                             | 4376323                                                      | 50.8                                          | 2.614          | 5        |
| [25-29)   | 0.00407     | 0.0201                                                       | 85194                                | 1715                                   | 421707                                             | 3947872                                                      | 46.3                                          | 2.513          | 5        |
| [30-34)   | 0.00449     | 0.0222                                                       | 83479                                | 1854                                   | 412808                                             | 3526165                                                      | 42.2                                          | 2.525          | 5        |
| [35-39)   | 0.00463     | 0.0229                                                       | 81625                                | 1868                                   | 403569                                             | 3113358                                                      | 38.1                                          | 2.560          | 5        |
| [40-44)   | 0.00555     | 0.0274                                                       | 79758                                | 2182                                   | 393543                                             | 2709789                                                      | 34.0                                          | 2.597          | 5        |
| [45-49)   | 0.00589     | 0.0291                                                       | 77575                                | 2255                                   | 382609                                             | 2316245                                                      | 29.9                                          | 2.665          | 5        |
| [50-54)   | 0.01040     | 0.0508                                                       | 75320                                | 3823                                   | 367794                                             | 1933636                                                      | 25.7                                          | 2.697          | 5        |
| [55-59)   | 0.01283     | 0.0623                                                       | 71496                                | 4454                                   | 347242                                             | 1565842                                                      | 21.9                                          | 2.701          | 5        |
| [60-64)   | 0.01747     | 0.0840                                                       | 67042                                | 5631                                   | 322284                                             | 1218600                                                      | 18.2                                          | 2.704          | 5        |
| [65-69)   | 0.03271     | 0.1520                                                       | 61412                                | 9337                                   | 285425                                             | 896316                                                       | 14.6                                          | 2.683          | 5        |
| [70-74)   | 0.05247     | 0.2335                                                       | 52075                                | 12157                                  | 231707                                             | 610891                                                       | 11.7                                          | 2.642          | 5        |
| [75-79)   | 0.08025     | 0.3361                                                       | 39918                                | 13417                                  | 167186                                             | 379184                                                       | 9.5                                           | 2.585          | 5        |
| [80-84)   | 0.10647     | 0.4208                                                       | 26500                                | 11151                                  | 104736                                             | 211998                                                       | 8.0                                           | 2.510          | 5        |
| 85+       | 0.14310     | 1.0000                                                       | 15349                                | 15349                                  | 107261                                             | 107261                                                       | 7.0                                           | 2.351          | 5        |

The mean additional survival time from the life table was matched by age and sex to calculated NCD YLL. An excerpt of the R code is given here:

```
## Calculate NCD male YLL
data$yllncd[age<1 & sex=="M" & broadgroup=="NCD"] <-58.0
data$yllncd[age>=1 & age<=5 & sex=="M" & $broadgroup=="NCD"] <-60.0
data$yllncd[age>5 & age<=10 & sex=="M" & $broadgroup=="NCD"] <-60.9
data$yllncd[age>10 & age<=15 & sex=="M" & $broadgroup=="NCD"] <-56.7
data$yllncd[age>15 & age<=20 & sex=="M" & $broadgroup=="NCD"] <-52.2
data$yllncd[age>20 & age<=25 & sex=="M" & $broadgroup=="NCD"] <-47.7
data$yllncd[age>25 & age<=30 & sex=="M" & $broadgroup=="NCD"] <-43.1
data$yllncd[age>30 & age<=35 & sex=="M" & $broadgroup=="NCD"] <-38.7
data$yllncd[age>35 & age<=40 & sex=="M" & broadgroup=="NCD"] <-34.4
data$yllncd[age>40 & age<=45 & sex=="M" & broadgroup=="NCD"] <-30.5
data$yllncd[age>45 & age<=50 & sex=="M" & broadgroup=="NCD"] <-26.5
data$yllncd[age>50 & age<=55 & sex=="M" & broadgroup=="NCD"] <-22.7
data$yllncd[age>55 & age<=60 & sex=="M" & broadgroup=="NCD"] <-19.2
data$yllncd[age>60 & age<=65 & sex=="M" & broadgroup=="NCD"] <-15.9
data$yllncd[age>65 & age<=70 & sex=="M" & broadgroup=="NCD"] <-12.8
data$yllncd[age>70 & age<=75 & sex=="M" & broadgroup=="NCD"] <-10.0
data$yllncd[age>75 & age<=80 & sex=="M" & broadgroup=="NCD"] <- 7.9
data$yllncd[age>80 & age<=85 & sex=="M" & broadgroup=="NCD"] <- 6.2
data$yllncd[age>85 & sex=="M" & broadgroup=="NCD"] <- 5.0

## Calculate NCD female YLL
data$yllncd[age< 1 & sex=="F" & broadgroup=="NCD"] <-61.5
data$yllncd[age>=1 & age<= 5 & sex=="F" & broadgroup=="NCD"] <-63.5
data$yllncd[age> 5 & age<=10 & sex=="F" & broadgroup=="NCD"] <-64.0
data$yllncd[age>10 & age<=15 & sex=="F" & broadgroup=="NCD"] <-59.8
data$yllncd[age>15 & age<=20 & sex=="F" & broadgroup=="NCD"] <-55.2
data$yllncd[age>20 & age<=25 & sex=="F" & broadgroup=="NCD"] <-50.8
data$yllncd[age>25 & age<=30 & sex=="F" & broadgroup=="NCD"] <-46.3
data$yllncd[age>30 & age<=35 & sex=="F" & broadgroup=="NCD"] <-42.2
data$yllncd[age>35 & age<=40 & sex=="F" & broadgroup=="NCD"] <-38.1
data$yllncd[age>40 & age<=45 & sex=="F" & broadgroup=="NCD"] <-34.0
```

```

data$yllncd[age>45 & age<=50 & sex=="F" & broadgroup=="NCD" ] <-29.9
data$yllncd[age>50 & age<=55 & sex=="F" & broadgroup=="NCD" ] <-25.7
data$yllncd[age>55 & age<=60 & sex=="F" & broadgroup=="NCD" ] <-21.9
data$yllncd[age>60 & age<=65 & sex=="F" & broadgroup=="NCD" ] <-18.2
data$yllncd[age>65 & age<=70 & sex=="F" & broadgroup=="NCD" ] <-14.6
data$yllncd[age>70 & age<=75 & sex=="F" & broadgroup=="NCD" ] <-11.7
data$yllncd[age>75 & age<=80 & sex=="F" & broadgroup=="NCD" ] <- 9.5
data$yllncd[age>80 & age<=85 & sex=="F" & broadgroup=="NCD" ] <- 8.0
data$yllncd[age>85 & sex=="F" & broadgroup=="NCD" ] <- 7.0

```

### Exploratory analysis

Exploratory analysis of NCD deaths and YLL stratified by year indicates that 2010, 2008 and 2001 recorded the highest number of NCD deaths and YLL.

**Supplementary Table 3:** Breakdown of NCD deaths and YLL by year.

| Year         | All-age    |                | Male       |               | Female     |               | 65+ Years  |               |
|--------------|------------|----------------|------------|---------------|------------|---------------|------------|---------------|
|              | NCD deaths | NCD YLL        | NCD deaths | NCD YLL       | NCD deaths | NCD YLL       | NCD deaths | NCD YLL       |
| 2000         | 45         | 1180.2         | 29         | 688.9         | 16         | 491.3         | 19         | 192           |
| 2001         | 86         | 2130.1         | 49         | 1253.1        | 37         | 877           | 38         | 405.3         |
| 2002         | 51         | 1229.9         | 24         | 565.7         | 27         | 664.2         | 23         | 236.1         |
| 2003         | 67         | 1697.6         | 34         | 864.1         | 33         | 833.5         | 28         | 278.9         |
| 2004         | 57         | 1141.8         | 32         | 640.1         | 25         | 501.7         | 31         | 313.9         |
| 2005         | 71         | 1618.7         | 34         | 598.9         | 37         | 1019.8        | 29         | 280.6         |
| 2006         | 77         | 1758.6         | 41         | 897.8         | 36         | 860.8         | 40         | 413.5         |
| 2007         | 71         | 1807.6         | 42         | 1076.5        | 29         | 731.1         | 29         | 288.5         |
| 2008         | 86         | 1894.2         | 52         | 1222.9        | 34         | 671.3         | 43         | 440.3         |
| 2009         | 75         | 1632.6         | 45         | 987.7         | 30         | 644.9         | 28         | 307.2         |
| 2010         | 104        | 2275.2         | 52         | 1036.5        | 52         | 1238.7        | 48         | 455.2         |
| <b>Total</b> | <b>790</b> | <b>18366.5</b> | <b>434</b> | <b>9832.2</b> | <b>356</b> | <b>8534.3</b> | <b>356</b> | <b>3611.5</b> |

Further stratification of NCD deaths and YLL by month shows that NCD-YLL are the greatest between November and April.

**Supplementary Table 4:** Breakdown of NCD deaths and YLL by month.

| Month        | Total      |                | Male       |               | Female     |               | 65+ Years  |               |
|--------------|------------|----------------|------------|---------------|------------|---------------|------------|---------------|
|              | NCD deaths | NCD YLL        | NCD deaths | NCD YLL       | NCD deaths | NCD YLL       | NCD deaths | NCD YLL       |
| Jan          | 71         | 1606.3         | 32         | 683.1         | 39         | 923.2         | 36         | 387           |
| Feb          | 75         | 1492.5         | 42         | 855           | 33         | 637.5         | 38         | 414.5         |
| Mar          | 62         | 1157.2         | 32         | 536.9         | 30         | 620.3         | 32         | 298.4         |
| Apr          | 73         | 1420.1         | 39         | 726.1         | 34         | 694           | 42         | 408.1         |
| May          | 66         | 1619.4         | 44         | 1010.1        | 22         | 609.3         | 26         | 232.3         |
| Jun          | 69         | 1913.9         | 37         | 964.6         | 32         | 949.3         | 25         | 243.8         |
| Jul          | 58         | 1456.2         | 30         | 710.4         | 28         | 745.8         | 26         | 275.9         |
| Aug          | 59         | 1536.6         | 31         | 842.3         | 28         | 694.3         | 21         | 229.8         |
| Sep          | 65         | 1641.6         | 34         | 796.6         | 31         | 845           | 23         | 241.2         |
| Oct          | 52         | 1252.3         | 31         | 790.4         | 21         | 461.9         | 24         | 242           |
| Nov          | 59         | 1414.1         | 37         | 886           | 22         | 528.1         | 29         | 315.2         |
| Dec          | 81         | 1856.3         | 45         | 1030.7        | 36         | 825.6         | 34         | 323.3         |
| <b>Total</b> | <b>790</b> | <b>18366.5</b> | <b>434</b> | <b>9832.2</b> | <b>356</b> | <b>8534.3</b> | <b>356</b> | <b>3611.5</b> |

A heaping effect can be found on the 9<sup>th</sup> day of every month.

**Supplementary Table 5:** Breakdown of NCD deaths and YLL by day.

| Day          | Total      |                | Male       |               | Female     |               | 65+ Years  |               |
|--------------|------------|----------------|------------|---------------|------------|---------------|------------|---------------|
|              | NCD deaths | NCD YLL        | NCD deaths | NCD YLL       | NCD deaths | NCD YLL       | NCD deaths | NCD YLL       |
| 1            | 34         | 677.6          | 19         | 326.5         | 15         | 351.1         | 15         | 165.1         |
| 2            | 26         | 602.7          | 8          | 183.4         | 18         | 419.3         | 13         | 143.2         |
| 3            | 16         | 337            | 10         | 199.5         | 6          | 137.5         | 7          | 59.8          |
| 4            | 25         | 591.7          | 10         | 230.2         | 15         | 361.5         | 10         | 100.5         |
| 5            | 18         | 408.7          | 13         | 220.5         | 5          | 188.2         | 8          | 78.8          |
| 6            | 21         | 430.2          | 11         | 257.9         | 10         | 172.3         | 12         | 115           |
| 7            | 18         | 409.1          | 9          | 196           | 9          | 213.1         | 8          | 79.7          |
| 8            | 24         | 442.9          | 16         | 333.2         | 8          | 109.7         | 13         | 114.9         |
| 9            | 179        | 4559           | 96         | 2325.4        | 83         | 2233.6        | 77         | 763.2         |
| 10           | 26         | 471.6          | 15         | 274.2         | 11         | 197.4         | 14         | 140.7         |
| 11           | 21         | 560.2          | 7          | 120.8         | 14         | 439.4         | 10         | 99.2          |
| 12           | 19         | 408.3          | 14         | 271.9         | 5          | 136.4         | 10         | 117.2         |
| 13           | 20         | 374            | 12         | 209.2         | 8          | 164.8         | 12         | 106.9         |
| 14           | 22         | 607.5          | 12         | 387.5         | 10         | 220           | 9          | 112.4         |
| 15           | 37         | 1033.6         | 25         | 733.1         | 12         | 300.5         | 6          | 47.8          |
| 16           | 27         | 646            | 16         | 385.4         | 11         | 260.6         | 7          | 71.4          |
| 17           | 17         | 569.4          | 10         | 361.5         | 7          | 207.9         | 4          | 36            |
| 18           | 21         | 533.7          | 13         | 302.1         | 8          | 231.6         | 9          | 107.4         |
| 19           | 16         | 364.6          | 6          | 203.3         | 10         | 161.3         | 7          | 79            |
| 20           | 24         | 543.5          | 10         | 224.6         | 14         | 318.9         | 13         | 159.9         |
| 21           | 18         | 402.8          | 11         | 244.5         | 7          | 158.3         | 11         | 108.5         |
| 22           | 15         | 280.6          | 10         | 221.4         | 5          | 59.2          | 11         | 113.4         |
| 23           | 11         | 181.8          | 8          | 107.8         | 3          | 74            | 7          | 68.1          |
| 24           | 19         | 414.2          | 11         | 179.9         | 8          | 234.3         | 9          | 79            |
| 25           | 21         | 448.2          | 10         | 214.1         | 11         | 234.1         | 11         | 100.7         |
| 26           | 22         | 486.1          | 13         | 306           | 9          | 180.1         | 6          | 63.9          |
| 27           | 24         | 458.7          | 14         | 293.1         | 10         | 165.6         | 12         | 116.5         |
| 28           | 13         | 243.2          | 6          | 95.6          | 7          | 147.6         | 9          | 101.4         |
| 29           | 17         | 423.7          | 7          | 130.9         | 10         | 292.8         | 6          | 57.5          |
| 30           | 14         | 386.8          | 10         | 282.7         | 4          | 104.1         | 6          | 65.2          |
| 31           | 5          | 69.1           | 2          | 10            | 3          | 59.1          | 4          | 39.2          |
| <b>Total</b> | <b>790</b> | <b>18366.5</b> | <b>434</b> | <b>9832.2</b> | <b>356</b> | <b>8534.3</b> | <b>356</b> | <b>3611.5</b> |

The histogram of number of NCD deaths and corresponding NCD-YLL stratified by day of the month reveals a heaping effect on 9<sup>th</sup> of every month. We control for this effect in the statistical modeling.

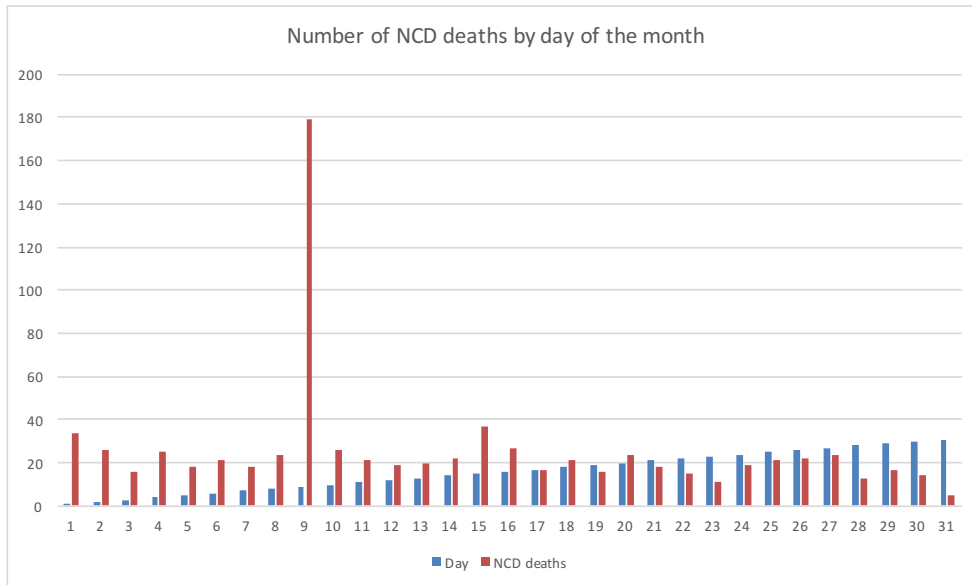

**Supplementary Figure 1:** Count of NCD deaths by day.

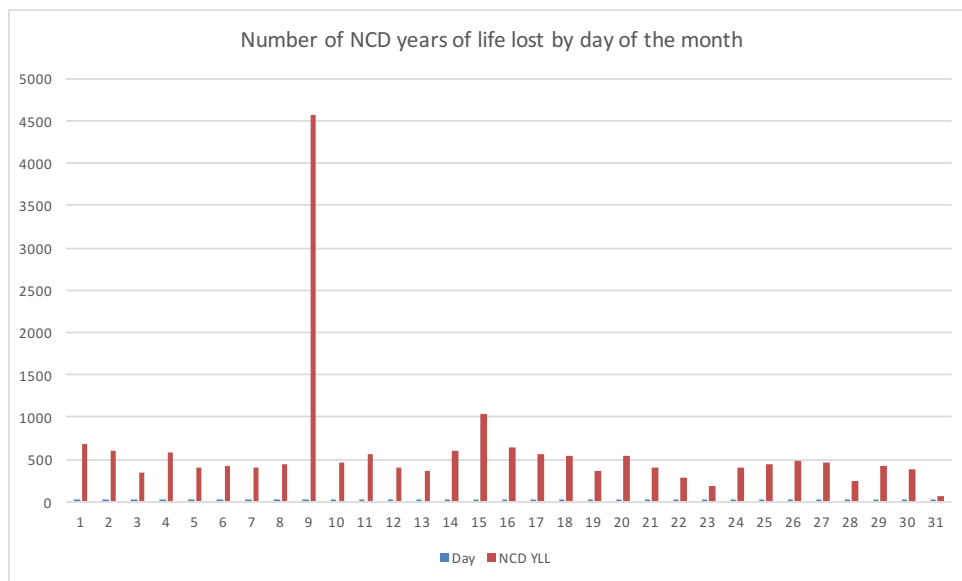

**Supplementary Figure 2:** Count of NCD-YLL by day.

### Statistical modeling

The histogram reveals that for most days (represented by 'Frequency' on the y axis) there were no NCD-YLL.

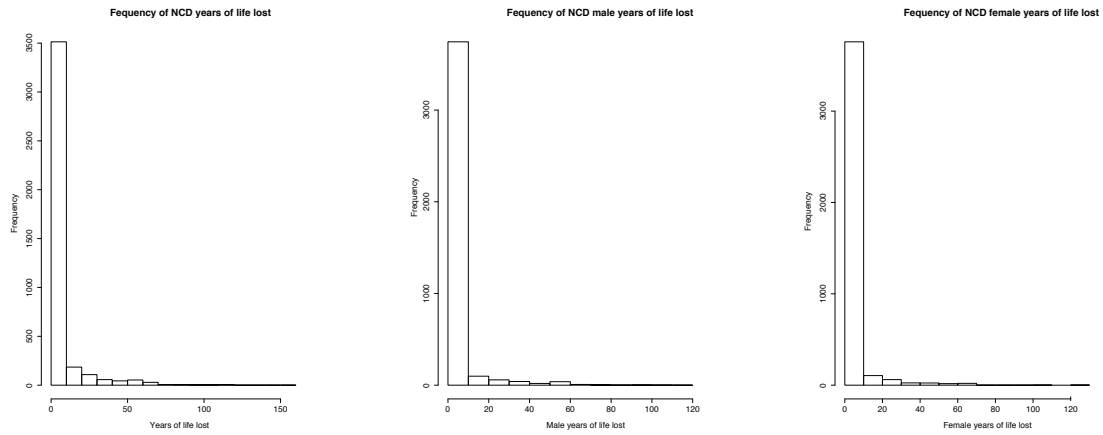

**Supplementary Figure 3:** Frequency of NCD-YLL for all-age, males and females.

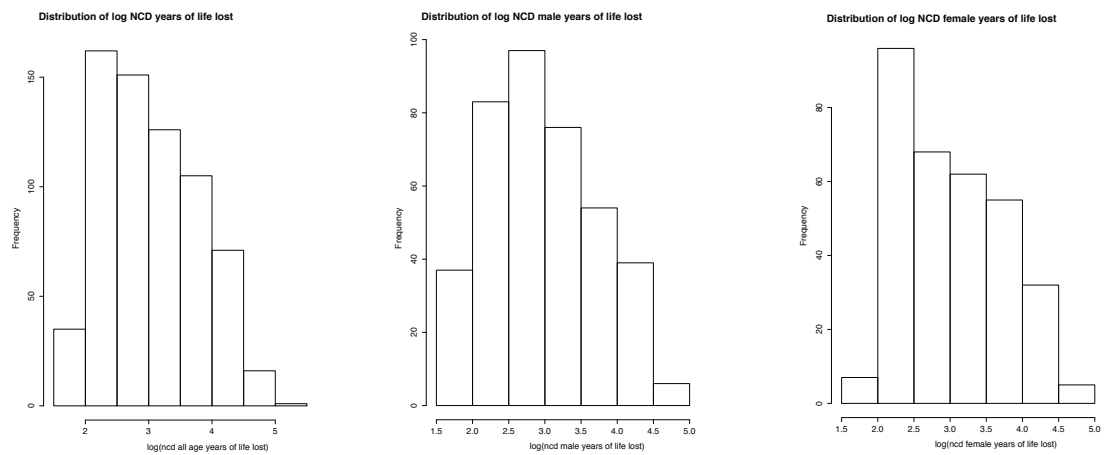

**Supplementary Figure 4:** Distribution of log NCD-YLL for all-age, males and females.

The plot of monthly maximum temperature and NCD YLL (2000-2010) shows that the peak in maximum temperature is associated with a trough in NCD YLL.

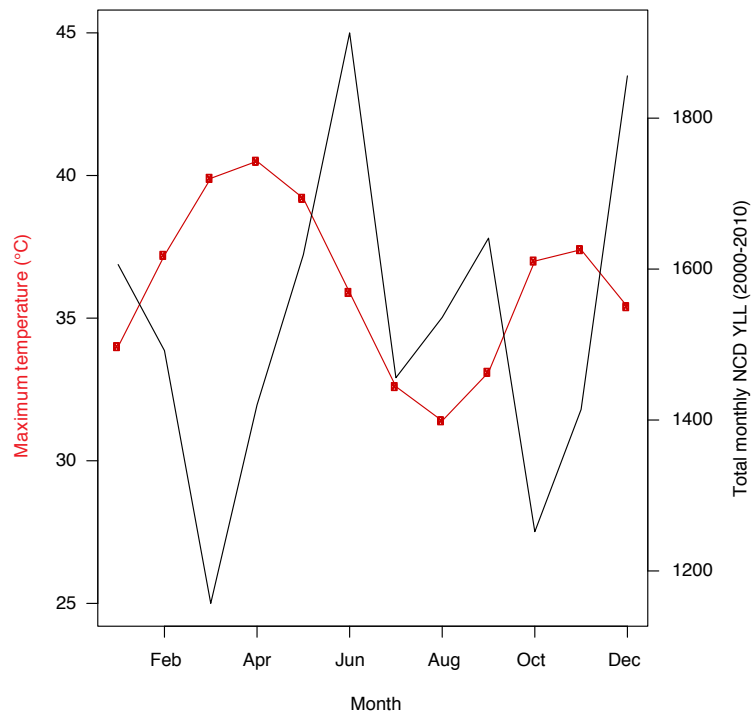

**Supplementary Figure 5:** Correlation between monthly maximum temperature and NCD mortality (2000-2010).

### Model validation

The cumulative periodogram test assessed whether the residuals were independent over time. The black diagonal line did not cross the confidence bounds (represented by the blue dotted lines) indicating that the residuals were independent (Supplementary Figure 6). Autocorrelation is that observations close in time are more likely to be alike than those separated by time. Because the short-term (day-to-day) association of temperature and NCD-YLL are of interest, it is important to control for season and long-term trends, which can make the short-term associations difficult to detect<sup>1</sup>. The presence of vertical spikes within the confines of the confidence bounds (blue dotted lines) also indicate that autocorrelation was removed in the autocorrelation function plot (Supplementary Figure 7). There was no evidence of autocorrelation after controlling for seasonality and long-term trends in the analysis.

<sup>1</sup> Bhaskaran K, Gasparri A, Hajat S, Smeeth L, Armstrong B (2013) Time series regression studies in environmental epidemiology. *Int J Epidemiol* 42:1187–1195.

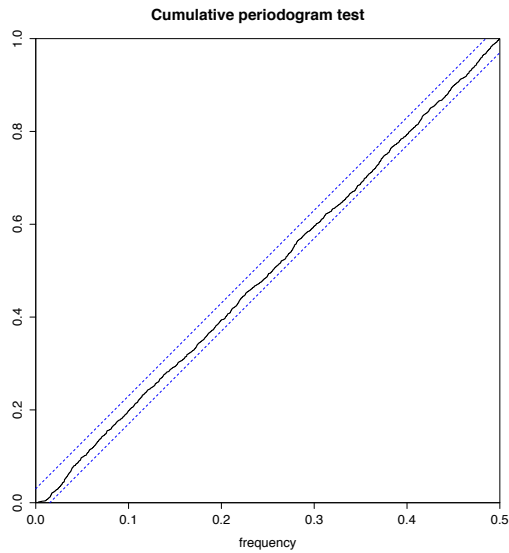

**Supplementary Figure 6:** Cumulative periodogram test determines the independence of residuals over time. The blue dotted lines are the confidence intervals.

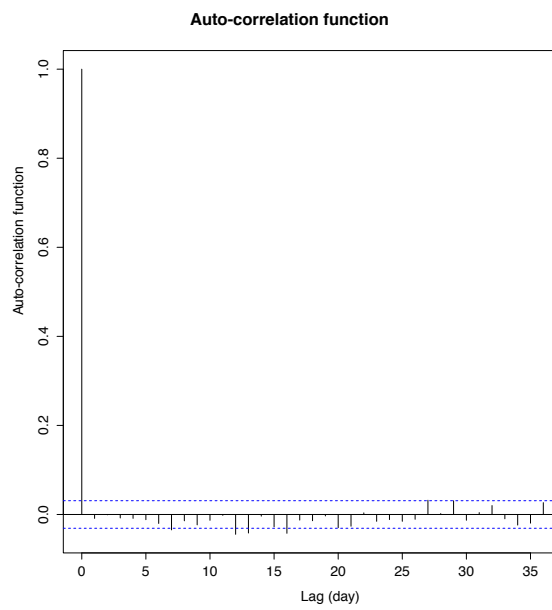

**Supplementary Figure 7:** Autocorrelation function of the base model. Vertical lines or ‘spikes’ are placed along individual lag days ( $x$ -axis). The height of the spike is relative to the magnitude of the autocorrelation function ( $y$ -axis). Autocorrelation at lag one is always one. Blue dotted lines are the confidence intervals.



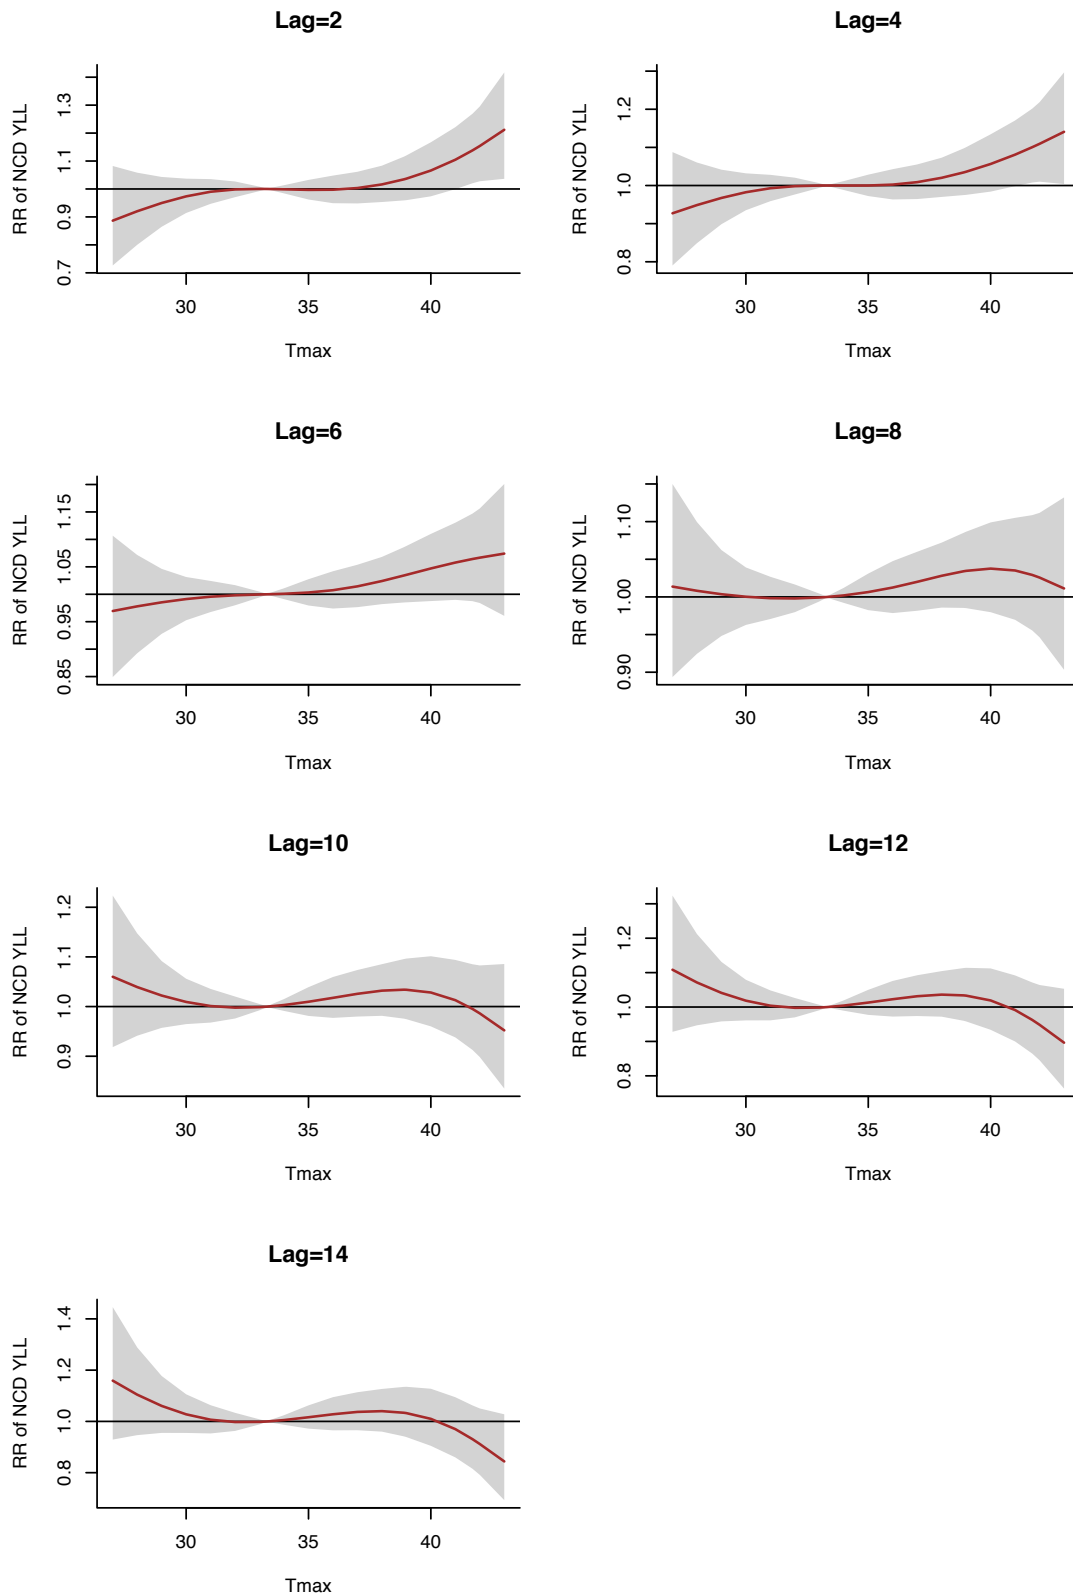

**Supplementary Figure 8:** Plots of the 4-day cumulative relative risk of non-communicable disease years of life lost for all ages stratified by lag days 2-14 (in two day increments).

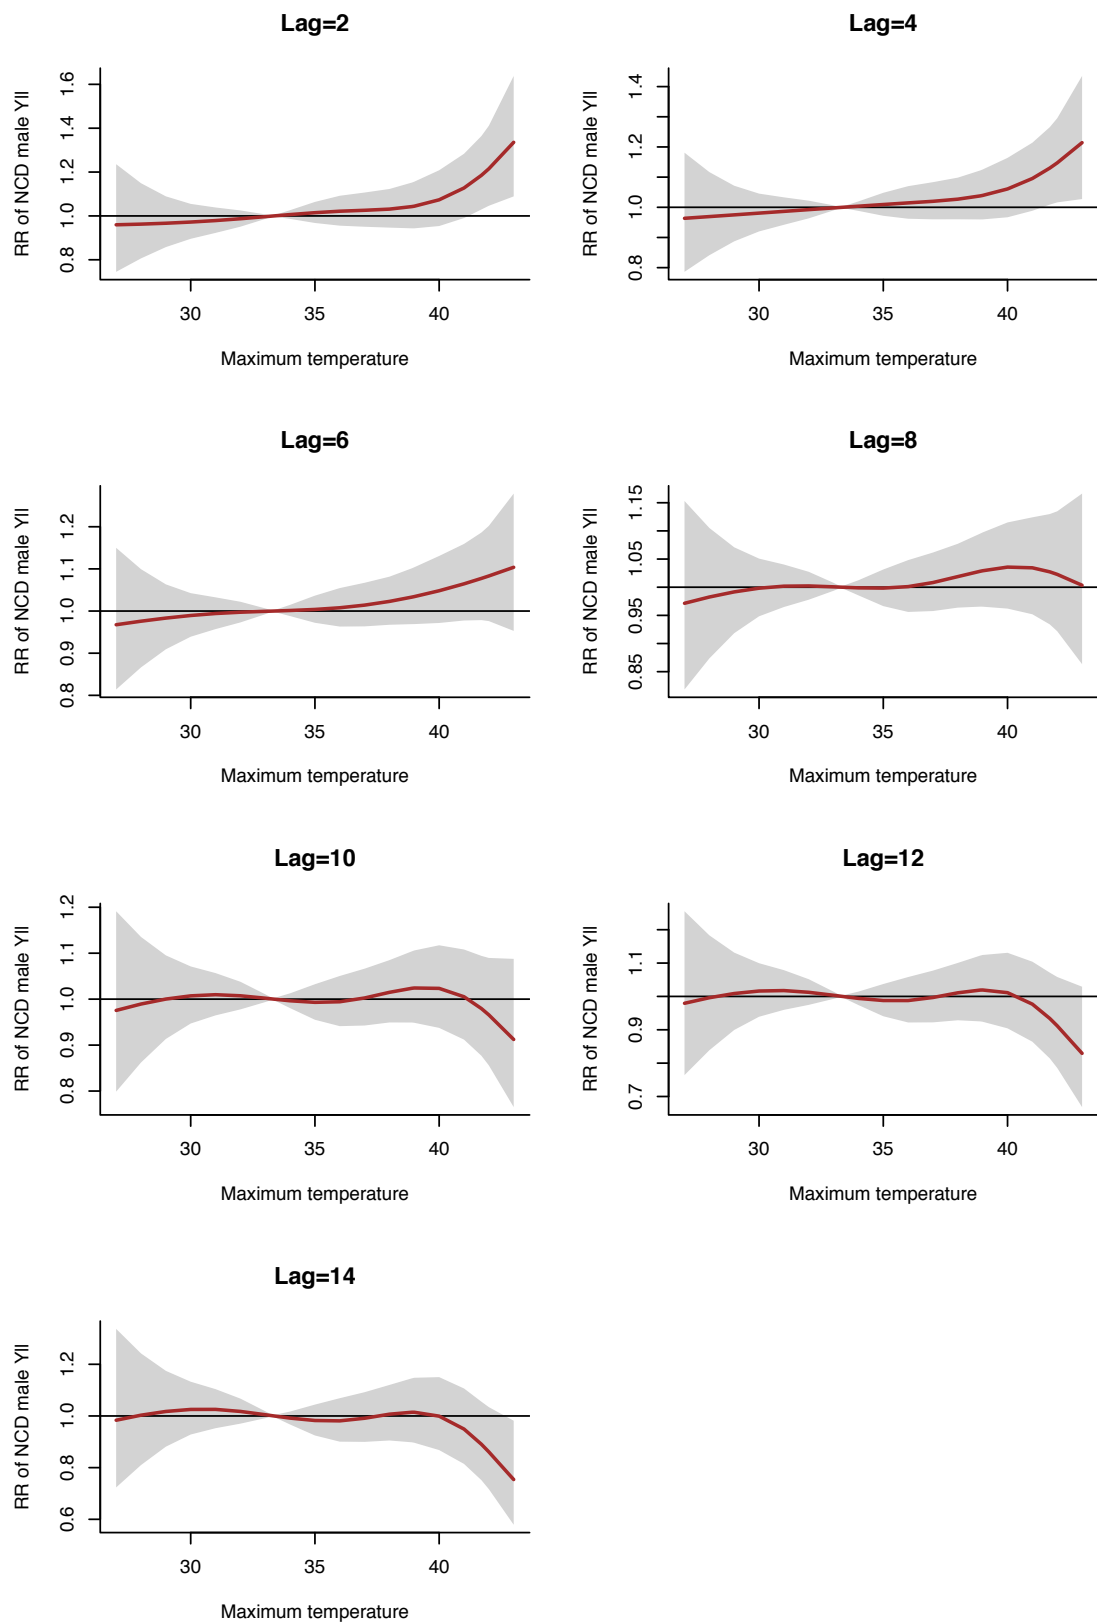

**Supplementary Figure 9:** Plots of the 4-day cumulative relative risk of non-communicable disease years of life lost for males stratified by lag days 2-14 (in two day increments).

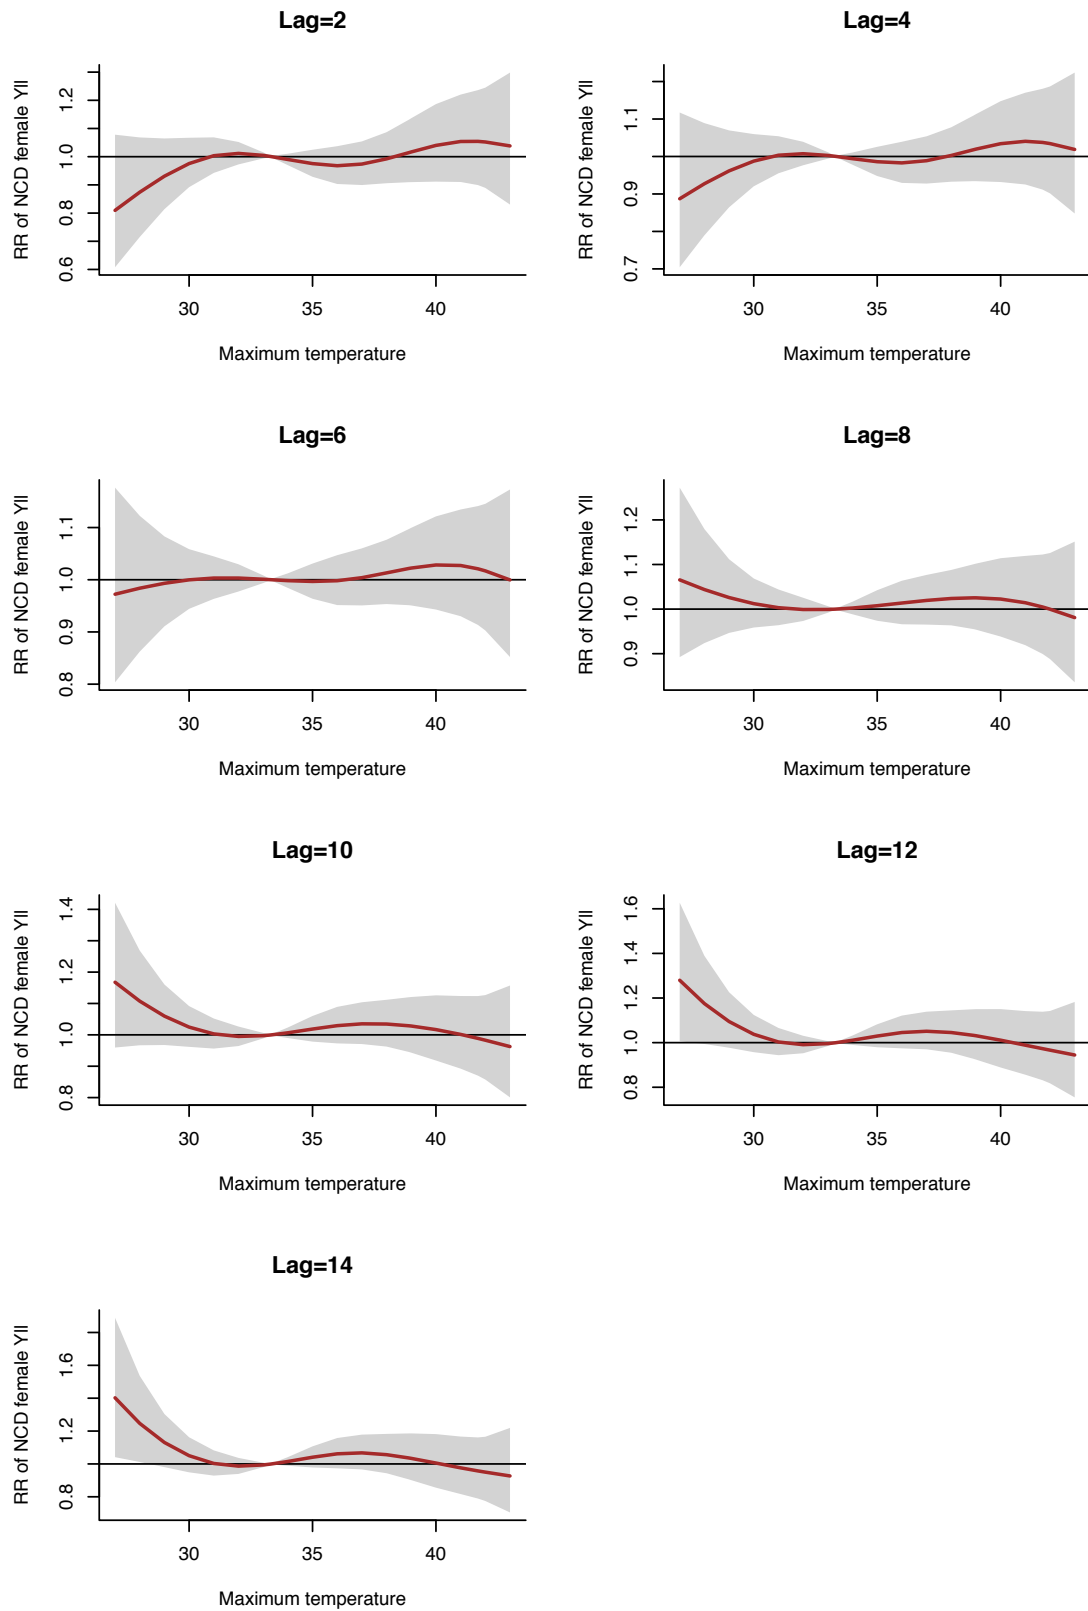

**Supplementary Figure 10:** Plots of the 4-day cumulative relative risk of non-communicable disease years of life lost for females stratified by lag days 2-14 (in two day increments).

**Supplementary Table 6a:** Relative risk (and 95% confidence bounds) of maximum temperature on non-communicable disease all-age years of life lost in Nouna stratified by individual lag days between 2000-2010. Relative risks are presented for; heat effects as 38.9°C, 41.1°C, 41.7°C and 42.8°C with reference to 36.4°C; cold effects as 27.8°C 30°C, 31.1°C and 33.3°C with reference to 36.4°C. Results controlled for long-term trends, season, day of the week, and heaping effect.

|              | 27.8°C<br>(1st percentile) | 30°C<br>(5th percentile) | 31.1°C<br>(10th percentile) | 33.3°C<br>(25th percentile) | 38.9°C<br>(75th percentile) | 41.4°C<br>(90th percentile) | 41.7°C<br>(95th percentile) | 42.8°C<br>(99th percentile) |
|--------------|----------------------------|--------------------------|-----------------------------|-----------------------------|-----------------------------|-----------------------------|-----------------------------|-----------------------------|
|              | 34 days below 27.8°C       | 174 days below 30°C      | 325 days below 31.3°C       | 912 days below 33.3°C       | 883 days above 38.9°C       | 300 days above 41.4°C       | 189 days above 41.7°C       | 28 days above 42.8°C        |
|              | RR (95% CI)                | RR (95% CI)              | RR (95% CI)                 | RR (95% CI)                 | RR (95% CI)                 | RR (95% CI)                 | RR (95% CI)                 | RR (95% CI)                 |
| <b>lag0</b>  | 0.88 (0.73 to 1.06)        | 0.96 (0.89 to 1.04)      | 0.99 (0.94 to 1.04)         | 1.00 (1.00 to 1.00)         | 1.03 (0.94 to 1.14)         | 1.16 (1.02 to 1.31)         | 1.18 (1.03 to 1.35)         | 1.27 (1.06 to 1.52)         |
| <b>lag1</b>  | 0.90 (0.76 to 1.06)        | 0.97 (0.90 to 1.04)      | 0.99 (0.94 to 1.04)         | 1.00 (1.00 to 1.00)         | 1.03 (0.95 to 1.13)         | 1.14 (1.01 to 1.28)         | 1.16 (1.03 to 1.31)         | 1.23 (1.05 to 1.45)         |
| <b>lag2</b>  | 0.91 (0.79 to 1.06)        | 0.97 (0.91 to 1.04)      | 0.99 (0.95 to 1.03)         | 1.00 (1.00 to 1.00)         | 1.03 (0.96 to 1.12)         | 1.12 (1.01 to 1.25)         | 1.14 (1.02 to 1.27)         | 1.20 (1.04 to 1.39)         |
| <b>lag3</b>  | 0.93 (0.81 to 1.06)        | 0.98 (0.92 to 1.03)      | 0.99 (0.96 to 1.03)         | 1.00 (1.00 to 1.00)         | 1.03 (0.97 to 1.11)         | 1.11 (1.01 to 1.22)         | 1.12 (1.01 to 1.23)         | 1.17 (1.02 to 1.33)         |
| <b>lag4</b>  | 0.94 (0.84 to 1.07)        | 0.98 (0.94 to 1.03)      | 0.99 (0.96 to 1.03)         | 1.00 (1.00 to 1.00)         | 1.03 (0.97 to 1.10)         | 1.09 (1.00 to 1.19)         | 1.10 (1.01 to 1.20)         | 1.13 (1.01 to 1.28)         |
| <b>lag5</b>  | 0.96 (0.86 to 1.07)        | 0.99 (0.94 to 1.03)      | 0.99 (0.97 to 1.03)         | 1.00 (1.00 to 1.00)         | 1.03 (0.98 to 1.09)         | 1.08 (1.00 to 1.16)         | 1.08 (1.00 to 1.17)         | 1.10 (0.99 to 1.23)         |
| <b>lag6</b>  | 0.98 (0.88 to 1.08)        | 0.99 (0.95 to 1.03)      | 1.00 (0.97 to 1.02)         | 1.00 (1.00 to 1.00)         | 1.03 (0.99 to 1.09)         | 1.06 (0.99 to 1.14)         | 1.06 (0.99 to 1.15)         | 1.07 (0.97 to 1.19)         |
| <b>lag7</b>  | 0.99 (0.90 to 1.09)        | 1.00 (0.96 to 1.03)      | 1.00 (0.97 to 1.02)         | 1.00 (1.00 to 1.00)         | 1.03 (0.99 to 1.08)         | 1.05 (0.98 to 1.12)         | 1.05 (0.97 to 1.13)         | 1.04 (0.94 to 1.16)         |
| <b>lag8</b>  | 1.01 (0.92 to 1.11)        | 1.00 (0.96 to 1.04)      | 1.00 (0.97 to 1.03)         | 1.00 (1.00 to 1.00)         | 1.03 (0.99 to 1.09)         | 1.03 (0.96 to 1.11)         | 1.03 (0.96 to 1.11)         | 1.01 (0.91 to 1.13)         |
| <b>lag9</b>  | 1.03 (0.93 to 1.13)        | 1.00 (0.96 to 1.05)      | 1.00 (0.97 to 1.03)         | 1.00 (1.00 to 1.00)         | 1.03 (0.98 to 1.09)         | 1.02 (0.94 to 1.10)         | 1.01 (0.94 to 1.10)         | 0.99 (0.88 to 1.10)         |
| <b>lag10</b> | 1.04 (0.94 to 1.16)        | 1.01 (0.96 to 1.06)      | 1.00 (0.97 to 1.03)         | 1.00 (1.00 to 1.00)         | 1.03 (0.98 to 1.10)         | 1.00 (0.92 to 1.09)         | 1.00 (0.91 to 1.09)         | 0.96 (0.85 to 1.08)         |
| <b>lag11</b> | 1.06 (0.94 to 1.19)        | 1.01 (0.96 to 1.07)      | 1.00 (0.97 to 1.04)         | 1.00 (1.00 to 1.00)         | 1.03 (0.97 to 1.10)         | 0.99 (0.90 to 1.08)         | 0.98 (0.89 to 1.08)         | 0.93 (0.82 to 1.07)         |
| <b>lag12</b> | 1.08 (0.94 to 1.23)        | 1.02 (0.96 to 1.08)      | 1.00 (0.96 to 1.05)         | 1.00 (1.00 to 1.00)         | 1.03 (0.96 to 1.11)         | 0.98 (0.88 to 1.08)         | 0.96 (0.86 to 1.07)         | 0.91 (0.78 to 1.05)         |
| <b>lag13</b> | 1.10 (0.94 to 1.27)        | 1.02 (0.96 to 1.09)      | 1.00 (0.96 to 1.05)         | 1.00 (1.00 to 1.00)         | 1.03 (0.95 to 1.12)         | 0.96 (0.86 to 1.08)         | 0.95 (0.84 to 1.07)         | 0.88 (0.75 to 1.04)         |
| <b>lag14</b> | 1.11 (0.94 to 1.32)        | 1.03 (0.96 to 1.11)      | 1.01 (0.95 to 1.06)         | 1.00 (1.00 to 1.00)         | 1.03 (0.94 to 1.13)         | 0.95 (0.84 to 1.08)         | 0.93 (0.82 to 1.06)         | 0.86 (0.71 to 1.03)         |

**Supplementary Table 6b:** Excess all-age average daily NCD-YLL (and 95% confidence bounds) in Nouna stratified by individual lag days between 2000-2010. Relative risks were used to calculate excess average daily NCD-YLL as follows: (Average daily NCD-YLL of all-age\* relative risk) – Average daily NCD-YLL. NCD-YLL are presented for; heat effects as 38.9°C, 41.1°C, 41.7°C and 42.8°C with reference to 36.4°C; cold effects as 27.8°C 30°C, 31.1°C and 33.3°C with reference to 36.4°C. Results controlled for long-term trends, season, day of the week, and heaping effect.

|              | 27.8°C<br>(1 <sup>st</sup> percentile) | 30°C<br>(5th percentile) | 31.1°C<br>(10th percentile) | 33.3°C<br>(25th percentile) | 38.9°C<br>(75th percentile) | 41.4°C<br>(90th percentile) | 41.7°C<br>(95th percentile) | 42.8°C<br>(99th percentile) |
|--------------|----------------------------------------|--------------------------|-----------------------------|-----------------------------|-----------------------------|-----------------------------|-----------------------------|-----------------------------|
|              | 34 days below 27.8°C                   | 174 days below 30°C      | 325 days below 31.3°C       | 912 days below 33.3°C       | 883 days above 38.9°C       | 300 days above 41.4°C       | 189 days above 41.7°C       | 28 days above 42.8°C        |
|              | YLL (95% CI)                           | YLL (95% CI)             | YLL (95% CI)                | YLL (95% CI)                | YLL (95% CI)                | YLL (95% CI)                | YLL (95% CI)                | YLL (95% CI)                |
| <b>lag0</b>  | -0.53 (-1.22 to 0.30)                  | -0.16 (-0.50 to 0.20)    | -0.05 (-0.29 to 0.20)       | 0.00 (-0.01 to 0.01)        | 0.16 (-0.27 to 0.63)        | 0.71 (0.07 to 1.45)         | 0.81 (0.13 to 1.59)         | 1.24 (0.28 to 2.38)         |
| <b>lag1</b>  | -0.47 (-1.10 to 0.29)                  | -0.14 (-0.45 to 0.19)    | -0.05 (-0.26 to 0.18)       | 0.00 (-0.01 to 0.01)        | 0.16 (-0.23 to 0.58)        | 0.64 (0.06 to 1.29)         | 0.72 (0.12 to 1.41)         | 1.07 (0.23 to 2.07)         |
| <b>lag2</b>  | -0.40 (-0.98 to 0.29)                  | -0.12 (-0.40 to 0.17)    | -0.04 (-0.23 to 0.16)       | 0.00 (0.00 to 0.01)         | 0.16 (-0.19 to 0.53)        | 0.57 (0.05 to 1.13)         | 0.63 (0.09 to 1.24)         | 0.92 (0.17 to 1.79)         |
| <b>lag3</b>  | -0.33 (-0.86 to 0.29)                  | -0.10 (-0.35 to 0.16)    | -0.03 (-0.21 to 0.14)       | 0.00 (0.00 to 0.00)         | 0.16 (-0.15 to 0.49)        | 0.49 (0.04 to 0.99)         | 0.55 (0.07 to 1.08)         | 0.77 (0.10 to 1.52)         |
| <b>lag4</b>  | -0.25 (-0.75 to 0.30)                  | -0.08 (-0.30 to 0.15)    | -0.03 (-0.18 to 0.13)       | 0.00 (0.00 to 0.00)         | 0.16 (-0.12 to 0.45)        | 0.42 (0.02 to 0.86)         | 0.46 (0.04 to 0.93)         | 0.62 (0.03 to 1.28)         |
| <b>lag5</b>  | -0.18 (-0.63 to 0.32)                  | -0.06 (-0.25 to 0.14)    | -0.02 (-0.16 to 0.12)       | 0.00 (0.00 to 0.00)         | 0.16 (-0.09 to 0.42)        | 0.35 (-0.01 to 0.74)        | 0.38 (0.00 to 0.79)         | 0.47 (-0.05 to 1.06)        |
| <b>lag6</b>  | -0.11 (-0.53 to 0.36)                  | -0.04 (-0.22 to 0.14)    | -0.02 (-0.14 to 0.11)       | 0.00 (0.00 to 0.00)         | 0.16 (-0.07 to 0.39)        | 0.28 (-0.05 to 0.64)        | 0.30 (-0.06 to 0.68)        | 0.33 (-0.15 to 0.88)        |
| <b>lag7</b>  | -0.03 (-0.44 to 0.42)                  | -0.02 (-0.19 to 0.16)    | -0.01 (-0.13 to 0.11)       | 0.00 (0.00 to 0.00)         | 0.16 (-0.06 to 0.39)        | 0.22 (-0.1 to 0.56)         | 0.21 (-0.12 to 0.58)        | 0.20 (-0.27 to 0.72)        |
| <b>lag8</b>  | 0.04 (-0.37 to 0.50)                   | 0.00 (-0.17 to 0.18)     | -0.01 (-0.13 to 0.12)       | 0.00 (0.00 to 0.00)         | 0.16 (-0.07 to 0.39)        | 0.15 (-0.17 to 0.49)        | 0.13 (-0.2 to 0.50)         | 0.07 (-0.40 to 0.58)        |
| <b>lag9</b>  | 0.12 (-0.32 to 0.61)                   | 0.02 (-0.16 to 0.21)     | 0.00 (-0.14 to 0.13)        | 0.00 (0.00 to 0.00)         | 0.16 (-0.08 to 0.41)        | 0.08 (-0.25 to 0.44)        | 0.06 (-0.30 to 0.44)        | -0.06 (-0.54 to 0.47)       |
| <b>lag10</b> | 0.20 (-0.29 to 0.74)                   | 0.04 (-0.16 to 0.26)     | 0.00 (-0.15 to 0.16)        | 0.00 (-0.01 to 0.00)        | 0.16 (-0.11 to 0.44)        | 0.02 (-0.35 to 0.41)        | -0.02 (-0.40 to 0.39)       | -0.19 (-0.69 to 0.39)       |
| <b>lag11</b> | 0.28 (-0.27 to 0.89)                   | 0.06 (-0.17 to 0.31)     | 0.01 (-0.16 to 0.18)        | 0.00 (-0.01 to 0.00)        | 0.16 (-0.15 to 0.48)        | -0.05 (-0.44 to 0.38)       | -0.10 (-0.51 to 0.36)       | -0.31 (-0.85 to 0.31)       |
| <b>lag12</b> | 0.36 (-0.26 to 1.07)                   | 0.08 (-0.18 to 0.36)     | 0.01 (-0.18 to 0.21)        | 0.00 (-0.01 to 0.00)        | 0.16 (-0.18 to 0.52)        | -0.11 (-0.55 to 0.37)       | -0.17 (-0.62 to 0.33)       | -0.43 (-1.01 to 0.25)       |
| <b>lag13</b> | 0.44 (-0.26 to 1.25)                   | 0.11 (-0.19 to 0.42)     | 0.02 (-0.20 to 0.24)        | 0.00 (-0.01 to 0.00)        | 0.16 (-0.23 to 0.57)        | -0.17 (-0.65 to 0.36)       | -0.25 (-0.74 to 0.31)       | -0.54 (-1.16 to 0.19)       |
| <b>lag14</b> | 0.53 (-0.26 to 1.45)                   | 0.13 (-0.21 to 0.49)     | 0.02 (-0.21 to 0.28)        | 0.00 (-0.01 to 0.01)        | 0.15 (-0.27 to 0.62)        | -0.24 (-0.75 to 0.35)       | -0.32 (-0.85 to 0.29)       | -0.65 (-1.31 to 0.14)       |

**Supplementary Table 7a:** Relative risk (and 95% confidence bounds) of maximum temperature on non-communicable disease male years of life lost in Nouna stratified by individual lag days between 2000-2010. Relative risks are presented for; heat effects as 38.9°C, 41.1°C, 41.7°C and 42.8°C with reference to 36.4°C; cold effects as 27.8°C 30°C, 31.1°C and 33.3°C with reference to 36.4°C. Results controlled for long-term trends, season, day of the week, and heaping effect.

|              | <b>27.8 °C</b><br><b>(1st percentile)</b> | <b>30 °C</b><br><b>(5th percentile)</b> | <b>31.1°C</b><br><b>(10th percentile)</b> | <b>33.3°C</b><br><b>(25th percentile)</b> | <b>38.9°C</b><br><b>(75th percentile)</b> | <b>41.4°C</b><br><b>(90th percentile)</b> | <b>41.7°C</b><br><b>(95th percentile)</b> | <b>42.8°C</b><br><b>(99th percentile)</b> |
|--------------|-------------------------------------------|-----------------------------------------|-------------------------------------------|-------------------------------------------|-------------------------------------------|-------------------------------------------|-------------------------------------------|-------------------------------------------|
|              | 34 days below 27.8°C                      | 174 days below 30°C                     | 325 days below 31.3°C                     | 912 days below 33.3°C                     | 883 days above 38.9°C                     | 300 days above 41.4°C                     | 189 days above 41.7°C                     | 28 days above 42.8°C                      |
|              | RR (95% CI)                               | RR (95% CI)                             | RR (95% CI)                               | RR (95% CI)                               | RR (95% CI)                               | RR (95% CI)                               | RR (95% CI)                               | RR (95% CI)                               |
| <b>lag0</b>  | 0.96 (0.75 to 1.21)                       | 0.96 (0.87 to 1.07)                     | 0.97 (0.90 to 1.04)                       | 1.00 (1.00 to 1.00)                       | 1.05 (0.92 to 1.19)                       | 1.2 (1.02 to 1.42)                        | 1.24 (1.04 to 1.48)                       | 1.43 (1.13 to 1.80)                       |
| <b>lag1</b>  | 0.96 (0.77 to 1.19)                       | 0.97 (0.88 to 1.06)                     | 0.98 (0.92 to 1.04)                       | 1.00 (1.00 to 1.00)                       | 1.04 (0.93 to 1.17)                       | 1.18 (1.02 to 1.37)                       | 1.21 (1.04 to 1.42)                       | 1.37 (1.11 to 1.69)                       |
| <b>lag2</b>  | 0.96 (0.79 to 1.16)                       | 0.97 (0.90 to 1.05)                     | 0.98 (0.93 to 1.04)                       | 1.00 (1.00 to 1.00)                       | 1.04 (0.94 to 1.15)                       | 1.16 (1.01 to 1.33)                       | 1.19 (1.03 to 1.36)                       | 1.31 (1.08 to 1.58)                       |
| <b>lag3</b>  | 0.96 (0.81 to 1.14)                       | 0.98 (0.91 to 1.05)                     | 0.98 (0.93 to 1.03)                       | 1.00 (1.00 to 1.00)                       | 1.04 (0.95 to 1.14)                       | 1.14 (1.01 to 1.28)                       | 1.16 (1.02 to 1.31)                       | 1.25 (1.06 to 1.49)                       |
| <b>lag4</b>  | 0.97 (0.83 to 1.13)                       | 0.98 (0.92 to 1.05)                     | 0.99 (0.94 to 1.03)                       | 1.00 (1.00 to 1.00)                       | 1.04 (0.96 to 1.12)                       | 1.11 (1.00 to 1.24)                       | 1.13 (1.01 to 1.27)                       | 1.20 (1.03 to 1.40)                       |
| <b>lag5</b>  | 0.97 (0.85 to 1.12)                       | 0.99 (0.93 to 1.04)                     | 0.99 (0.95 to 1.03)                       | 1.00 (1.00 to 1.00)                       | 1.04 (0.97 to 1.11)                       | 1.09 (0.99 to 1.20)                       | 1.10 (1.00 to 1.22)                       | 1.15 (0.99 to 1.33)                       |
| <b>lag6</b>  | 0.97 (0.86 to 1.11)                       | 0.99 (0.94 to 1.04)                     | 0.99 (0.96 to 1.03)                       | 1.00 (1.00 to 1.00)                       | 1.03 (0.97 to 1.10)                       | 1.07 (0.98 to 1.17)                       | 1.08 (0.98 to 1.19)                       | 1.10 (0.96 to 1.26)                       |
| <b>lag7</b>  | 0.98 (0.86 to 1.11)                       | 0.99 (0.95 to 1.05)                     | 1.00 (0.96 to 1.03)                       | 1.00 (1.00 to 1.00)                       | 1.03 (0.97 to 1.10)                       | 1.05 (0.96 to 1.15)                       | 1.05 (0.96 to 1.16)                       | 1.05 (0.92 to 1.20)                       |
| <b>lag8</b>  | 0.98 (0.86 to 1.11)                       | 1.00 (0.95 to 1.05)                     | 1.00 (0.97 to 1.04)                       | 1.00 (1.00 to 1.00)                       | 1.03 (0.97 to 1.10)                       | 1.03 (0.94 to 1.13)                       | 1.03 (0.93 to 1.13)                       | 1.01 (0.88 to 1.16)                       |
| <b>lag9</b>  | 0.98 (0.86 to 1.13)                       | 1.00 (0.95 to 1.06)                     | 1.01 (0.97 to 1.05)                       | 1.00 (1.00 to 1.00)                       | 1.03 (0.96 to 1.10)                       | 1.01 (0.92 to 1.11)                       | 1.00 (0.91 to 1.11)                       | 0.96 (0.83 to 1.12)                       |
| <b>lag10</b> | 0.99 (0.85 to 1.15)                       | 1.01 (0.95 to 1.07)                     | 1.01 (0.97 to 1.06)                       | 1.00 (1.00 to 1.00)                       | 1.02 (0.95 to 1.10)                       | 0.99 (0.89 to 1.10)                       | 0.98 (0.88 to 1.09)                       | 0.92 (0.78 to 1.09)                       |
| <b>lag11</b> | 0.99 (0.84 to 1.17)                       | 1.01 (0.94 to 1.08)                     | 1.01 (0.96 to 1.07)                       | 1.00 (1.00 to 1.00)                       | 1.02 (0.94 to 1.11)                       | 0.97 (0.87 to 1.09)                       | 0.96 (0.85 to 1.08)                       | 0.88 (0.74 to 1.06)                       |
| <b>lag12</b> | 0.99 (0.82 to 1.20)                       | 1.02 (0.94 to 1.10)                     | 1.02 (0.96 to 1.08)                       | 1.00 (1.00 to 1.00)                       | 1.02 (0.93 to 1.12)                       | 0.95 (0.84 to 1.09)                       | 0.93 (0.81 to 1.07)                       | 0.85 (0.69 to 1.03)                       |
| <b>lag13</b> | 1.00 (0.81 to 1.23)                       | 1.02 (0.93 to 1.12)                     | 1.02 (0.96 to 1.09)                       | 1.00 (1.00 to 1.00)                       | 1.02 (0.91 to 1.13)                       | 0.94 (0.81 to 1.08)                       | 0.91 (0.78 to 1.06)                       | 0.81 (0.65 to 1.01)                       |
| <b>lag14</b> | 1.00 (0.79 to 1.26)                       | 1.03 (0.93 to 1.13)                     | 1.02 (0.95 to 1.10)                       | 1.00 (1.00 to 1.00)                       | 1.01 (0.90 to 1.15)                       | 0.92 (0.78 to 1.08)                       | 0.89 (0.75 to 1.06)                       | 0.78 (0.61 to 0.99)                       |

**Supplementary Table 7b:** Excess male average daily NCD-YLL (and 95% confidence bounds) in Nouna stratified by individual lag days between 2000-2010. Relative risks were used to calculate excess average daily NCD-YLL as follows: (Average daily NCD-YLL of male \* relative risk) – Average daily NCD-YLL. NCD-YLL are presented for; heat effects as 38.9°C, 41.1°C, 41.7°C and 42.8°C with reference to 36.4°C; cold effects as 27.8°C 30°C, 31.1°C and 33.3°C with reference to 36.4°C. Results controlled for long-term trends, season, day of the week, and heaping effect.

|              | <b>27.8 °C</b><br><b>(1st percentile)</b> | <b>30 °C</b><br><b>(5th percentile)</b> | <b>31.1 °C</b><br><b>(10th percentile)</b> | <b>33.3 °C</b><br><b>(25th percentile)</b> | <b>38.9 °C</b><br><b>(75th percentile)</b> | <b>41.4 °C</b><br><b>(90<sup>th</sup> percentile)</b> | <b>41.7 °C</b><br><b>(95th percentile)</b> | <b>42.8 °C</b><br><b>(99th percentile)</b> |
|--------------|-------------------------------------------|-----------------------------------------|--------------------------------------------|--------------------------------------------|--------------------------------------------|-------------------------------------------------------|--------------------------------------------|--------------------------------------------|
|              | 34 days below 27.8°C                      | 174 days below 30°C                     | 325 days below 31.3°C                      | 912 days below 33.3°C                      | 883 days above 38.9°C                      | 300 days above 41.4°C                                 | 189 days above 41.7°C                      | 28 days above 42.8°C                       |
|              | YLL (95% CI)                              | YLL (95% CI)                            | YLL (95% CI)                               | YLL (95% CI)                               | YLL (95% CI)                               | YLL (95% CI)                                          | YLL (95% CI)                               | YLL (95% CI)                               |
| <b>lag0</b>  | -0.11 (-0.59 to 0.51)                     | -0.09 (-0.31 to 0.16)                   | -0.07 (-0.23 to 0.11)                      | 0.00 (-0.01 to 0.00)                       | 0.11 (-0.18 to 0.45)                       | 0.49 (0.05 to 1.01)                                   | 0.58 (0.11 to 1.15)                        | 1.03 (0.32 to 1.93)                        |
| <b>lag1</b>  | -0.10 (-0.54 to 0.45)                     | -0.08 (-0.28 to 0.15)                   | -0.06 (-0.20 to 0.10)                      | 0.00 (-0.01 to 0.00)                       | 0.11 (-0.16 to 0.41)                       | 0.43 (0.04 to 0.89)                                   | 0.51 (0.09 to 1.01)                        | 0.88 (0.26 to 1.65)                        |
| <b>lag2</b>  | -0.09 (-0.49 to 0.39)                     | -0.07 (-0.25 to 0.13)                   | -0.05 (-0.18 to 0.09)                      | 0.00 (0.00 to 0.00)                        | 0.10 (-0.14 to 0.36)                       | 0.38 (0.03 to 0.78)                                   | 0.44 (0.07 to 0.87)                        | 0.74 (0.20 to 1.40)                        |
| <b>lag3</b>  | -0.08 (-0.45 to 0.35)                     | -0.06 (-0.22 to 0.12)                   | -0.04 (-0.16 to 0.08)                      | 0.00 (0.00 to 0.00)                        | 0.10 (-0.11 to 0.33)                       | 0.33 (0.02 to 0.68)                                   | 0.38 (0.05 to 0.75)                        | 0.61 (0.13 to 1.17)                        |
| <b>lag4</b>  | -0.08 (-0.41 to 0.31)                     | -0.05 (-0.19 to 0.11)                   | -0.03 (-0.13 to 0.08)                      | 0.00 (0.00 to 0.00)                        | 0.09 (-0.10 to 0.29)                       | 0.27 (0.00 to 0.58)                                   | 0.31 (0.02 to 0.64)                        | 0.48 (0.06 to 0.96)                        |
| <b>lag5</b>  | -0.07 (-0.37 to 0.28)                     | -0.04 (-0.17 to 0.10)                   | -0.02 (-0.12 to 0.07)                      | 0.00 (0.00 to 0.00)                        | 0.08 (-0.08 to 0.26)                       | 0.22 (-0.02 to 0.49)                                  | 0.25 (-0.01 to 0.54)                       | 0.36 (-0.01 to 0.78)                       |
| <b>lag6</b>  | -0.06 (-0.34 to 0.26)                     | -0.03 (-0.15 to 0.10)                   | -0.01 (-0.10 to 0.08)                      | 0.00 (0.00 to 0.00)                        | 0.08 (-0.07 to 0.24)                       | 0.17 (-0.05 to 0.42)                                  | 0.19 (-0.05 to 0.45)                       | 0.24 (-0.10 to 0.63)                       |
| <b>lag7</b>  | -0.05 (-0.33 to 0.26)                     | -0.01 (-0.13 to 0.11)                   | 0.00 (-0.09 to 0.08)                       | 0.00 (0.00 to 0.00)                        | 0.07 (-0.07 to 0.23)                       | 0.12 (-0.09 to 0.35)                                  | 0.12 (-0.1 to 0.37)                        | 0.13 (-0.19 to 0.49)                       |
| <b>lag8</b>  | -0.05 (-0.33 to 0.27)                     | 0.00 (-0.12 to 0.12)                    | 0.00 (-0.08 to 0.09)                       | 0.00 (0.00 to 0.00)                        | 0.07 (-0.08 to 0.23)                       | 0.07 (-0.14 to 0.30)                                  | 0.07 (-0.16 to 0.31)                       | 0.02 (-0.30 to 0.38)                       |
| <b>lag9</b>  | -0.04 (-0.34 to 0.3)                      | 0.01 (-0.12 to 0.14)                    | 0.01 (-0.08 to 0.11)                       | 0.00 (0.00 to 0.00)                        | 0.06 (-0.10 to 0.24)                       | 0.03 (-0.19 to 0.27)                                  | 0.01 (-0.22 to 0.26)                       | -0.08 (-0.40 to 0.29)                      |
| <b>lag10</b> | -0.03 (-0.36 to 0.35)                     | 0.02 (-0.13 to 0.17)                    | 0.02 (-0.08 to 0.13)                       | 0.00 (0.00 to 0.00)                        | 0.06 (-0.12 to 0.25)                       | -0.02 (-0.25 to 0.24)                                 | -0.05 (-0.30 to 0.23)                      | -0.18 (-0.52 to 0.21)                      |
| <b>lag11</b> | -0.02 (-0.39 to 0.41)                     | 0.03 (-0.14 to 0.20)                    | 0.03 (-0.09 to 0.16)                       | 0.00 (0.00 to 0.00)                        | 0.05 (-0.15 to 0.27)                       | -0.07 (-0.32 to 0.22)                                 | -0.10 (-0.37 to 0.2)                       | -0.28 (-0.63 to 0.14)                      |
| <b>lag12</b> | -0.02 (-0.42 to 0.47)                     | 0.04 (-0.15 to 0.24)                    | 0.04 (-0.09 to 0.18)                       | 0.00 (0.00 to 0.00)                        | 0.05 (-0.18 to 0.29)                       | -0.11 (-0.39 to 0.21)                                 | -0.16 (-0.45 to 0.17)                      | -0.37 (-0.74 to 0.08)                      |
| <b>lag13</b> | -0.01 (-0.46 to 0.54)                     | 0.05 (-0.16 to 0.28)                    | 0.05 (-0.10 to 0.21)                       | 0.00 (0.00 to 0.01)                        | 0.04 (-0.21 to 0.32)                       | -0.15 (-0.46 to 0.19)                                 | -0.21 (-0.52 to 0.15)                      | -0.46 (-0.84 to 0.03)                      |
| <b>lag14</b> | 0.00 (-0.50 to 0.62)                      | 0.06 (-0.17 to 0.32)                    | 0.06 (-0.11 to 0.24)                       | 0.00 (0.00 to 0.01)                        | 0.03 (-0.24 to 0.35)                       | -0.20 (-0.52 to 0.19)                                 | -0.26 (-0.60 to 0.13)                      | -0.54 (-0.94 to -0.02)                     |

**Supplementary Table 8a:** Relative risk (and 95% confidence bounds) of maximum temperature on non-communicable disease female years of life lost in Nouna stratified by individual lag days between 2000-2010. Relative risks are presented for; heat effects as 38.9°C, 41.1°C, 41.7°C and 42.8°C with reference to 36.4°C; cold effects as 27.8°C 30°C, 31.1°C and 33.3°C with reference to 36.4°C. Results controlled for long-term trends, season, day of the week, and heaping effect.

|              | <b>27.8 °C</b><br><b>(1st percentile)</b> | <b>30 °C</b><br><b>(5<sup>th</sup> percentile)</b> | <b>31.1 °C</b><br><b>(10th percentile)</b> | <b>33.3 °C</b><br><b>(25th percentile)</b> | <b>38.9 °C</b><br><b>(75th percentile)</b> | <b>41.4 °C</b><br><b>(90th percentile)</b> | <b>41.7 °C</b><br><b>(95th percentile)</b> | <b>42.8 °C</b><br><b>(99th percentile)</b> |
|--------------|-------------------------------------------|----------------------------------------------------|--------------------------------------------|--------------------------------------------|--------------------------------------------|--------------------------------------------|--------------------------------------------|--------------------------------------------|
|              | 34 days below 27.8 °C                     | 174 days below 30 °C                               | 325 days below 31.3°C                      | 912 days below 33.3°C                      | 883 days above 38.9°C                      | 300 days above 41.4°C                      | 189 days above 41.7°C                      | 28 days above 42.8°C                       |
|              | RR (95% CI)                               | RR (95% CI)                                        | RR (95% CI)                                | RR (95% CI)                                | RR (95% CI)                                | RR (95% CI)                                | RR (95% CI)                                | RR (95% CI)                                |
| <b>lag0</b>  | 0.81 (0.62 to 1.05)                       | 0.96 (0.86 to 1.08)                                | 1.01 (0.93 to 1.09)                        | 1.00 (1.00 to 1.00)                        | 1.01 (0.88 to 1.16)                        | 1.07 (0.89 to 1.29)                        | 1.07 (0.88 to 1.30)                        | 1.06 (0.82 to 1.37)                        |
| <b>lag1</b>  | 0.83 (0.66 to 1.06)                       | 0.97 (0.88 to 1.07)                                | 1.01 (0.94 to 1.08)                        | 1.00 (1.00 to 1.00)                        | 1.01 (0.90 to 1.14)                        | 1.06 (0.90 to 1.26)                        | 1.06 (0.89 to 1.27)                        | 1.05 (0.83 to 1.33)                        |
| <b>lag2</b>  | 0.86 (0.69 to 1.07)                       | 0.98 (0.89 to 1.07)                                | 1.01 (0.95 to 1.07)                        | 1.00 (1.00 to 1.00)                        | 1.01 (0.91 to 1.13)                        | 1.06 (0.91 to 1.23)                        | 1.05 (0.90 to 1.24)                        | 1.04 (0.84 to 1.28)                        |
| <b>lag3</b>  | 0.89 (0.73 to 1.08)                       | 0.98 (0.91 to 1.06)                                | 1.00 (0.95 to 1.06)                        | 1.00 (1.00 to 1.00)                        | 1.02 (0.92 to 1.12)                        | 1.05 (0.91 to 1.20)                        | 1.05 (0.91 to 1.21)                        | 1.03 (0.85 to 1.25)                        |
| <b>lag4</b>  | 0.92 (0.77 to 1.09)                       | 0.99 (0.92 to 1.06)                                | 1.00 (0.96 to 1.05)                        | 1.00 (1.00 to 1.00)                        | 1.02 (0.93 to 1.11)                        | 1.04 (0.92 to 1.18)                        | 1.04 (0.91 to 1.18)                        | 1.02 (0.86 to 1.21)                        |
| <b>lag5</b>  | 0.95 (0.81 to 1.11)                       | 0.99 (0.93 to 1.06)                                | 1.00 (0.96 to 1.05)                        | 1.00 (1.00 to 1.00)                        | 1.02 (0.94 to 1.10)                        | 1.03 (0.92 to 1.15)                        | 1.03 (0.91 to 1.16)                        | 1.01 (0.86 to 1.19)                        |
| <b>lag6</b>  | 0.98 (0.85 to 1.13)                       | 1.00 (0.94 to 1.06)                                | 1.00 (0.96 to 1.04)                        | 1.00 (1.00 to 1.00)                        | 1.02 (0.95 to 1.10)                        | 1.02 (0.92 to 1.14)                        | 1.02 (0.91 to 1.14)                        | 1.00 (0.86 to 1.17)                        |
| <b>lag7</b>  | 1.01 (0.89 to 1.16)                       | 1.01 (0.95 to 1.06)                                | 1.00 (0.97 to 1.04)                        | 1.00 (1.00 to 1.00)                        | 1.02 (0.96 to 1.10)                        | 1.02 (0.92 to 1.13)                        | 1.01 (0.91 to 1.13)                        | 0.99 (0.86 to 1.15)                        |
| <b>lag8</b>  | 1.05 (0.92 to 1.20)                       | 1.01 (0.96 to 1.07)                                | 1.00 (0.96 to 1.04)                        | 1.00 (1.00 to 1.00)                        | 1.03 (0.96 to 1.10)                        | 1.01 (0.91 to 1.12)                        | 1.00 (0.90 to 1.12)                        | 0.98 (0.85 to 1.14)                        |
| <b>lag9</b>  | 1.08 (0.94 to 1.24)                       | 1.02 (0.96 to 1.08)                                | 1.00 (0.96 to 1.04)                        | 1.00 (1.00 to 1.00)                        | 1.03 (0.95 to 1.11)                        | 1.00 (0.90 to 1.12)                        | 1.00 (0.89 to 1.12)                        | 0.98 (0.83 to 1.14)                        |
| <b>lag10</b> | 1.12 (0.97 to 1.30)                       | 1.02 (0.96 to 1.09)                                | 1.00 (0.96 to 1.05)                        | 1.00 (1.00 to 1.00)                        | 1.03 (0.95 to 1.12)                        | 0.99 (0.88 to 1.12)                        | 0.99 (0.87 to 1.12)                        | 0.97 (0.81 to 1.15)                        |
| <b>lag11</b> | 1.16 (0.98 to 1.36)                       | 1.03 (0.96 to 1.11)                                | 1.00 (0.95 to 1.05)                        | 1.00 (1.00 to 1.00)                        | 1.03 (0.94 to 1.13)                        | 0.99 (0.86 to 1.13)                        | 0.98 (0.85 to 1.13)                        | 0.96 (0.79 to 1.16)                        |
| <b>lag12</b> | 1.19 (1.00 to 1.43)                       | 1.04 (0.96 to 1.12)                                | 1.00 (0.94 to 1.06)                        | 1.00 (1.00 to 1.00)                        | 1.03 (0.93 to 1.15)                        | 0.98 (0.84 to 1.14)                        | 0.97 (0.83 to 1.14)                        | 0.95 (0.77 to 1.17)                        |
| <b>lag13</b> | 1.23 (1.01 to 1.51)                       | 1.04 (0.95 to 1.14)                                | 1.00 (0.94 to 1.07)                        | 1.00 (1.00 to 1.00)                        | 1.03 (0.92 to 1.17)                        | 0.97 (0.82 to 1.15)                        | 0.97 (0.81 to 1.15)                        | 0.94 (0.75 to 1.19)                        |
| <b>lag14</b> | 1.27 (1.02 to 1.60)                       | 1.05 (0.95 to 1.16)                                | 1.00 (0.93 to 1.08)                        | 1.00 (1.00 to 1.00)                        | 1.04 (0.91 to 1.19)                        | 0.97 (0.80 to 1.16)                        | 0.96 (0.79 to 1.16)                        | 0.93 (0.72 to 1.20)                        |



**Supplementary Table 8b:** Excess female average daily NCD-YLL (and 95% confidence bounds) in Nouna stratified by individual lag days between 2000-2010. Relative risks were used to calculate excess average daily NCD-YLL as follows: (Average daily NCD-YLL of female \* relative risk) – Average daily NCD-YLL. NCD-YLL are presented for; heat effects as 38.9°C, 41.1°C, 41.7°C and 42.8°C with reference to 36.4°C; cold effects as 27.8°C 30°C, 31.1°C and 33.3°C with reference to 36.4°C. Results controlled for long-term trends, season, day of the week, and heaping effect.

|              | 27.8 °C<br>(1st percentile) | 30 °C<br>(5th percentile) | 31.1°C<br>(10th percentile) | 33.3°C<br>(25 <sup>th</sup> percentile) | 38.9°C<br>(75th percentile) | 41.4°C (<br>90 <sup>th</sup> percentile) | 41.7°C<br>(95th percentile) | 42.8°C<br>(99th percentile) |
|--------------|-----------------------------|---------------------------|-----------------------------|-----------------------------------------|-----------------------------|------------------------------------------|-----------------------------|-----------------------------|
|              | 34 days below 27.8°C        | 174 days below 30°C       | 325 days below 31.3°C       | 912 days below 33.3°C                   | 883 days above 38.9°C       | 300 days above 41.4°C                    | 189 days above 41.7°C       | 28 days above 42.8°C        |
|              | YLL (95% CI)                | YLL (95% CI)              | YLL (95% CI)                | YLL (95% CI)                            | YLL (95% CI)                | YLL (95% CI)                             | YLL (95% CI)                | YLL (95% CI)                |
| <b>lag0</b>  | -0.41 (-0.80 to 0.11)       | -0.08 (-0.29 to 0.16)     | 0.01 (-0.14 to 0.18)        | 0.00 (0.00 to 0.01)                     | 0.02 (-0.25 to 0.33)        | 0.15 (-0.24 to 0.61)                     | 0.15 (-0.25 to 0.63)        | 0.13 (-0.37 to 0.78)        |
| <b>lag1</b>  | -0.35 (-0.72 to 0.13)       | -0.06 (-0.26 to 0.15)     | 0.01 (-0.13 to 0.16)        | 0.00 (0.00 to 0.01)                     | 0.03 (-0.22 to 0.30)        | 0.13 (-0.22 to 0.55)                     | 0.13 (-0.23 to 0.56)        | 0.11 (-0.35 to 0.68)        |
| <b>lag2</b>  | -0.29 (-0.64 to 0.15)       | -0.05 (-0.23 to 0.14)     | 0.01 (-0.11 to 0.14)        | 0.00 (0.00 to 0.00)                     | 0.03 (-0.19 to 0.28)        | 0.12 (-0.2 to 0.48)                      | 0.11 (-0.21 to 0.50)        | 0.09 (-0.33 to 0.60)        |
| <b>lag3</b>  | -0.23 (-0.56 to 0.17)       | -0.04 (-0.20 to 0.13)     | 0.01 (-0.10 to 0.13)        | 0.00 (0.00 to 0.00)                     | 0.03 (-0.16 to 0.25)        | 0.10 (-0.18 to 0.42)                     | 0.10 (-0.20 to 0.43)        | 0.07 (-0.31 to 0.52)        |
| <b>lag4</b>  | -0.17 (-0.48 to 0.20)       | -0.03 (-0.17 to 0.13)     | 0.01 (-0.09 to 0.11)        | 0.00 (0.00 to 0.00)                     | 0.04 (-0.14 to 0.23)        | 0.08 (-0.17 to 0.37)                     | 0.08 (-0.19 to 0.38)        | 0.05 (-0.29 to 0.45)        |
| <b>lag5</b>  | -0.10 (-0.39 to 0.23)       | -0.01 (-0.14 to 0.12)     | 0.01 (-0.08 to 0.10)        | 0.00 (0.00 to 0.00)                     | 0.04 (-0.12 to 0.21)        | 0.07 (-0.16 to 0.33)                     | 0.06 (-0.18 to 0.33)        | 0.03 (-0.28 to 0.39)        |
| <b>lag6</b>  | -0.04 (-0.31 to 0.28)       | 0.00 (-0.12 to 0.12)      | 0.01 (-0.07 to 0.09)        | 0.00 (0.00 to 0.00)                     | 0.05 (-0.10 to 0.20)        | 0.05 (-0.16 to 0.29)                     | 0.04 (-0.18 to 0.30)        | 0.01 (-0.29 to 0.35)        |
| <b>lag7</b>  | 0.03 (-0.24 to 0.34)        | 0.01 (-0.10 to 0.13)      | 0.01 (-0.07 to 0.09)        | 0.00 (0.00 to 0.00)                     | 0.05 (-0.09 to 0.20)        | 0.04 (-0.17 to 0.27)                     | 0.03 (-0.19 to 0.27)        | -0.01 (-0.30 to 0.32)       |
| <b>lag8</b>  | 0.10 (-0.17 to 0.41)        | 0.03 (-0.09 to 0.14)      | 0.01 (-0.07 to 0.09)        | 0.00 (0.00 to 0.00)                     | 0.05 (-0.09 to 0.21)        | 0.02 (-0.19 to 0.25)                     | 0.01 (-0.21 to 0.26)        | -0.03 (-0.32 to 0.30)       |
| <b>lag9</b>  | 0.17 (-0.12 to 0.51)        | 0.04 (-0.08 to 0.17)      | 0.00 (-0.08 to 0.09)        | 0.00 (0.00 to 0.00)                     | 0.06 (-0.10 to 0.23)        | 0.00 (-0.22 to 0.25)                     | -0.01 (-0.24 to 0.25)       | -0.05 (-0.35 to 0.30)       |
| <b>lag10</b> | 0.25 (-0.07 to 0.62)        | 0.05 (-0.08 to 0.19)      | 0.00 (-0.09 to 0.10)        | 0.00 (0.00 to 0.00)                     | 0.06 (-0.11 to 0.25)        | -0.01 (-0.25 to 0.26)                    | -0.02 (-0.27 to 0.26)       | -0.07 (-0.39 to 0.31)       |
| <b>lag11</b> | 0.33 (-0.04 to 0.75)        | 0.07 (-0.08 to 0.22)      | 0.00 (-0.10 to 0.11)        | 0.00 (0.00 to 0.00)                     | 0.06 (-0.13 to 0.28)        | -0.03 (-0.29 to 0.27)                    | -0.04 (-0.31 to 0.27)       | -0.09 (-0.44 to 0.33)       |
| <b>lag12</b> | 0.41 (-0.01 to 0.90)        | 0.08 (-0.09 to 0.26)      | 0.00 (-0.12 to 0.13)        | 0.00 (0.00 to 0.00)                     | 0.07 (-0.15 to 0.31)        | -0.04 (-0.33 to 0.29)                    | -0.06 (-0.35 to 0.29)       | -0.11 (-0.48 to 0.36)       |
| <b>lag13</b> | 0.49 (0.02 to 1.07)         | 0.09 (-0.10 to 0.30)      | 0.00 (-0.13 to 0.14)        | 0.00 (-0.01 to 0.00)                    | 0.07 (-0.17 to 0.35)        | -0.06 (-0.37 to 0.31)                    | -0.07 (-0.40 to 0.31)       | -0.13 (-0.54 to 0.39)       |
| <b>lag14</b> | 0.58 (0.04 to 1.25)         | 0.11 (-0.11 to 0.34)      | 0.00 (-0.15 to 0.16)        | 0.00 (-0.01 to 0.00)                    | 0.08 (-0.20 to 0.39)        | -0.07 (-0.42 to 0.34)                    | -0.09 (-0.44 to 0.34)       | -0.14 (-0.59 to 0.43)       |

Effect estimates withstood changes to model parameters.

**Supplementary Table 9:** Cumulative relative risk (and 95% confidence bounds) of maximum temperature on NCD years of life lost in Nouna between 2000-2010 at 41.7°C with reference to 36.4°C stratified by variations in model parameters. Results controlled for long-term trends, season, day of the week, and heaping effect. df=degrees of freedom.

|                                                                       | Lag structure     | RR (95% CI)          |
|-----------------------------------------------------------------------|-------------------|----------------------|
| <b>Knots for exposure-response: 10th, 50th, and 90th (Base model)</b> | 4 day cumulative  | 2.08 (1.08 to 4.01)  |
| <b>Knots for exposure-response: 10th, 75th, and 90th</b>              | 4 day cumulative  | 2.10 (1.07 to 4.13)  |
| <b>Knots for exposure-response: 10th, 25th, 75th and 90th</b>         | 4 day cumulative  | 2.11 (1.07 to 4.15)  |
| <b>Cubic B-spline for exposure-response</b>                           | 4 day cumulative  | 2.11 (0.96 to 4.66)  |
| <b>Df for exposure-response: 3df, and lag-response: 3df</b>           | 4 day cumulative  | 2.14 (1.10 to 4.15)  |
| <b>Df for lag-response: 5</b>                                         | 4 day cumulative  | 1.98 (1.02 to 3.87)  |
| <b>Df/year for seasonal control: 5</b>                                | 4 day cumulative  | 1.47 (0.82 to 2.64)  |
| <b>Df/year for seasonal control: 6</b>                                | 4 day cumulative  | 1.61 (0.87 to 3.01)  |
| <b>Df/year for seasonal control: 7</b>                                | 4 day cumulative  | 2.00 (1.06 to 3.80)  |
| <b>Df/year for seasonal control: 10</b>                               | 4 day cumulative  | 2.14 (1.09 to 4.22)  |
| <b>Log(yll) with Gaussian family</b>                                  | 4 day cumulative  | 1.82 (0.96 to 3.45)* |
| <b>Extending lag period: 14 days lag</b>                              | 14 day cumulative | 1.98 (0.66 to 5.91)  |
| <b>Extending lag period: 28 days lag</b>                              | 28 day cumulative | 0.67 (0.11 to 4.24)  |

\* effect estimate is YLL.

The model applying a natural cubic spline with knots placed at the 10<sup>th</sup>, 50<sup>th</sup> and 90<sup>th</sup> percentile for the exposure-response relationship, and 2 degrees of freedom with equal knot placement for the lag-response relationship along a logarithmic scale presented the lowest Quasi Akaike Information Criterion (QAIC). This was therefore selected as the final model.

**Supplementary Table 10:** Quasi Akaike Information Criterion (QAIC) values used for selecting the optimal model. NS=natural cubic spline, BS=cubic B-spline, tmax=maximum temperature, df=degrees of freedom.

| Model                                                                                       | QAIC    |
|---------------------------------------------------------------------------------------------|---------|
| NS knots placed at 10, 50, 90th percentile for tmax, 2df lag                                | 4320.82 |
| NS knots placed at 10, 50, 90th percentile for tmax, 3df lag                                | 4324.96 |
| NS knots placed at 10, 50, 90th percentile for tmax, 5df lag                                | 4333.91 |
| NS knots placed at 10, 25, 75, 90th percentile for tmax, 2df lag                            | 4323.75 |
| NS knots placed at 10, 75, 90th percentile for tmax, 2df lag                                | 4320.91 |
| NS equal knots for exposure-response, 2df tmax, 2df lag                                     | 4326.68 |
| NS equal knots for exposure-response, 4df tmax, 2df lag                                     | 4331.27 |
| NS equal knots for exposure-response, 3df tmax, 2df lag                                     | 4328.83 |
| NS equal knots for exposure-response, 3df tmax, 3df lag                                     | 4332.39 |
| BS knots placed at 10, 50, 90th percentile for tmax, 4df for lag (2df for lag were too few) | 4340.54 |
